# Supplementary material
Source: publisher figshare collection journal article supplement (https://gsapubs.figshare.com/articles/dataset/_/12541475)
Supplement: Supplementary file 1 [file 1]

## Sheet: Schoenig02
	TABLE DR5. EMPA OF DETRITAL GARNETS
	sample	grain number	measurement spot	EMPA (wt%)									classification after Tolosana-Delgado et al. (2018)						molar proportions
				SiO2	MgO	CaO	TiO2	FeOtotal	Al2O3	Cr2O3	MnO	wttotal	prob (metamorphic)	A	B	C	D	E	XMg	XFe	XCa	XMn
		Gt_Kakanui_STD	Grt_Kakanui_STD	41.69	18.83	5.26	0.3907	10.28	23.31	0.0822	0.3101	100.15
		Olivine_S_STD	Olivine_Score_STD	40.82	49.04	0.0878	<0.022	9.38	0.0316	0.0333	0.1447	99.54
		Wollastonite_STD	Wollastonite_STD	50.01	0.0322	47.79	<0.022	0.3632	0.0333	<0.026	0.1442	98.37
		TiO2_STD	TiO_STD	0.0339	<0.020	<0.028	99.83	<0.046	<0.025	<0.027	<0.025	99.89
		2O3_STD	corerO_STD	<0.033	<0.021	<0.030	<0.027	<0.047	<0.025	99.86	0.0601	99.96
		hodonit_STD	Rhodonit_STD	47.63	1.89	7.21	<0.024	0.9936	0.0521	<0.028	42.16	99.98
		Heatit_STD	Hemantleatit_STD	<0.032	<0.020	<0.032	0.0467	89.38	<0.025	<0.033	<0.029	89.46
		Gt_Kakanui_STD	Grt_Kakanui_STD	41.62	18.76	5.13	0.4018	10.24	23.34	0.0978	0.3229	99.92
		Olivine_S_STD	Olivine_Score_STD	40.96	49.01	0.0844	0.0209	9.27	0.0262	0.035	0.1154	99.52
		Wollastonite_STD	Wollastonite_STD	52.3	0.036	47.72	<0.021	0.3437	<0.026	<0.026	0.1823	100.6
		TiO2_STD	TiO_STD	<0.031	<0.021	<0.030	99.98	<0.042	0.0281	<0.027	<0.024	100.04
		2O3_STD	corerO_STD	<0.032	<0.021	<0.031	<0.028	<0.045	<0.026	100.17	0.0438	100.28
		hodonit_STD	Rhodonit_STD	47.9	1.85	7.18	<0.024	0.9501	0.0574	<0.028	42.26	100.2
		Heatit_STD	Hemantleatit_STD	<0.032	<0.020	<0.031	<0.029	90.01	<0.027	<0.033	<0.029	90.06
		Gt_Kakanui_STD	Grt_Kakanui_STD	41.62	18.91	5.16	0.3879	10.35	23.56	0.0914	0.3132	100.39
		Olivine_S_STD	Olivine_Score_STD	40.84	49.08	0.0989	<0.021	9.36	<0.022	<0.025	0.1445	99.57
		Wollastonite_STD	Wollastonite_STD	52.17	0.0431	47.78	<0.022	0.3778	<0.026	0.0365	0.145	100.58
		TiO2_STD	TiO_STD	<0.033	<0.020	<0.030	99.36	<0.044	<0.024	<0.027	<0.025	99.42
		2O3_STD	corerO_STD	0.0413	<0.023	<0.030	<0.027	<0.045	0.0271	100.13	<0.034	100.29
		hodonit_STD	Rhodonit_STD	47.74	1.9	7.33	<0.024	1.0166	0.0575	<0.030	41.96	100.01
		Heatit_STD	Hemantleatit_STD	0.0446	<0.021	<0.031	0.0656	89.79	<0.026	<0.033	<0.028	89.97
		Gt_Kakanui_STD	Grt_Kakanui_STD	41.46	18.72	5.1	0.404	10.37	23.3	0.1188	0.2731	99.75
		Olivine_S_STD	Olivine_Score_STD	40.54	49.14	0.0977	<0.021	9.17	0.0615	<0.024	0.1246	99.17
		Wollastonite_STD	Wollastonite_STD	52.25	0.0564	47.63	<0.023	0.3507	<0.025	<0.026	0.158	100.46
		TiO2_STD	TiO_STD	0.0488	<0.022	<0.028	99.7	<0.042	<0.025	<0.028	<0.025	99.77
		2O3_STD	corerO_STD	0.0483	<0.020	0.0316	<0.027	<0.046	<0.026	99.88	0.0393	100.06
		hodonit_STD	Rhodonit_STD	47.67	1.87	7.24	<0.025	0.9833	0.0347	<0.029	41.98	99.77
		Heatit_STD	Hemantleatit_STD	<0.032	<0.020	<0.030	<0.028	89.96	<0.026	<0.033	<0.030	90.04
		Gt_Kakanui_STD	Grt_Kakanui_STD	41.45	18.92	5.06	0.3897	10.21	23.34	0.0786	0.3318	99.78
		Olivine_S_STD	Olivine_Score_STD	40.65	49.13	0.1055	<0.021	9.39	<0.022	0.0476	0.1441	99.48
		Wollastonite_STD	Wollastonite_STD	52.09	0.0437	47.94	<0.022	0.3925	<0.026	<0.026	0.1049	100.59
		TiO2_STD	TiO_STD	<0.031	<0.022	<0.027	99.79	<0.044	0.0298	<0.027	<0.024	99.83
		2O3_STD	corerO_STD	<0.032	<0.020	<0.031	<0.027	<0.045	0.0317	99.92	0.0487	100.05
		hodonit_STD	Rhodonit_STD	47.67	1.86	7.27	<0.025	0.9294	0.0459	<0.028	42.15	99.94
		Heatit_STD	Hemantleatit_STD	<0.034	<0.021	<0.031	0.0751	90.17	0.0372	<0.033	<0.029	90.29
		Gt_Kakanui_STD	Grt_Kakanui_STD	41.6	18.9	5.06	0.4208	10.19	23.3	0.0835	0.3049	99.86
		Olivine_S_STD	Olivine_Score_STD	40.64	49.11	0.1043	<0.021	9.24	<0.023	<0.025	0.1154	99.24
		Wollastonite_STD	Wollastonite_STD	52.05	0.0544	47.86	<0.022	0.3982	<0.027	<0.026	0.1387	100.52
		TiO2_STD	TiO_STD	<0.031	<0.020	<0.029	100	<0.043	0.0352	<0.027	<0.024	100.09
		2O3_STD	corerO_STD	0.0392	<0.021	<0.030	<0.027	<0.051	<0.026	100.36	0.0754	100.48
		hodonit_STD	Rhodonit_STD	47.98	1.91	7.23	<0.025	0.9296	0.0432	<0.028	42.35	100.45
		Heatit_STD	Hemantleatit_STD	<0.032	0.0352	<0.031	<0.029	90.01	<0.027	<0.033	<0.029	90.09
		Gt_Kakanui_STD	Grt_Kakanui_STD	41.77	18.78	5.09	0.4087	10.21	23.44	0.0854	0.2898	100.07
		Olivine_S_STD	Olivine_Score_STD	40.89	49.04	0.1041	<0.020	9.42	0.0454	<0.024	0.1291	99.65
		Wollastonite_STD	Wollastonite_STD	52.21	0.0319	47.68	<0.022	0.3206	0.0312	<0.026	0.1452	100.43
		TiO2_STD	TiO_STD	0.0444	<0.022	<0.028	99.86	<0.046	<0.026	<0.027	<0.024	99.93
		2O3_STD	corerO_STD	<0.033	<0.020	<0.030	<0.028	<0.047	0.0415	99.98	<0.034	100.09
		hodonit_STD	Rhodonit_STD	48.01	1.88	7.25	<0.025	1.0123	0.0327	<0.029	42.31	100.51
		Heatit_STD	Hemantleatit_STD	<0.033	0.0395	<0.032	0.086	89.81	<0.025	<0.032	<0.029	89.96
		Gt_Kakanui_STD	Grt_Kakanui_STD	41.62	18.78	5.19	0.3933	10.4	23.1	0.0872	0.3294	99.89
		Olivine_S_STD	Olivine_Score_STD	40.83	49.05	0.0627	<0.022	9.42	0.0365	0.0433	0.1483	99.59
		Wollastonite_STD	Wollastonite_STD	52.15	0.0394	47.94	<0.022	0.3626	<0.026	<0.026	0.121	100.62
		TiO2_STD	TiO_STD	<0.032	<0.019	<0.030	99.5	<0.044	0.0347	<0.027	0.0247	99.6
		2O3_STD	corerO_STD	0.0546	<0.020	<0.031	<0.027	<0.046	<0.026	99.93	0.0558	100.09
		hodonit_STD	Rhodonit_STD	47.67	1.87	7.18	<0.024	1.0192	0.0347	<0.029	42.1	99.87
		Heatit_STD	Hemantleatit_STD	<0.033	<0.021	<0.032	<0.028	89.68	<0.026	<0.033	<0.029	89.75
	all detrital garnets
	JS-Erz-3s	1	core	39.55	8.05	11.7	0.1849	17.85	22.25	0.0382	0.3472	99.96	0.999995	0.805069	0.0133089	0.181616	2.76975e-07	5.28654e-06	0.301802	0.375384	0.315422	0.00739141
	JS-Erz-3s	2	core	39.22	8.04	7.58	0.1479	23.41	21.91	0.0381	0.4245	100.78	0.999993	0.598157	0.0322974	0.369538	2.26143e-07	7.36363e-06	0.299322	0.488876	0.202824	0.00897801
	JS-Erz-3s	3	core	38.25	4.55	9.27	0.1321	25.56	21.89	<0.027	0.4639	100.13	0.999997	0.684729	0.127143	0.187599	0.000526039	3.05839e-06	0.176432	0.555454	0.257901	0.0102128
	JS-Erz-3s	4	core	39.49	8.9	6.38	0.1112	23.39	22.13	0.0611	0.4311	100.89	0.999991	0.556253	0.0314657	0.412272	1.23032e-06	8.5902e-06	0.331448	0.488762	0.170671	0.00911894
	JS-Erz-3s	11	core	38.38	6.19	2.95	0.0688	30.38	21.92	<0.027	0.4477	100.34	0.999988	0.376513	0.183286	0.439663	0.000526039	1.16563e-05	0.241724	0.665413	0.0829249	0.00993755
	JS-Erz-3s	16	core	38.38	5.82	8.97	0.1182	24.04	21.8	<0.026	0.4693	99.61	0.999996	0.678345	0.0728871	0.248238	0.000526039	3.99961e-06	0.223611	0.518499	0.247646	0.010244
	JS-Erz-3s	19	core	38.08	2.28	9.88	0.0701	27.76	21.6	<0.027	0.8335	100.5	0.999971	0.33652	0.553921	0.109003	0.000526039	2.9044e-05	0.0896117	0.612375	0.279388	0.0186258
	JS-Erz-3s	20	core	38.63	6.22	8.71	0.0879	24.11	22.09	<0.026	0.3976	100.26	0.999998	0.723425	0.0578888	0.218158	0.000526039	2.13298e-06	0.237069	0.515749	0.238561	0.00862069
	JS-Erz-3s	24	core	38.03	2.51	8.57	0.0479	29.25	21.55	<0.027	0.6802	100.64	0.999981	0.376506	0.488698	0.134251	0.000526039	1.87003e-05	0.0984324	0.644574	0.24182	0.0151743
	JS-Erz-3s	25	core	39.65	6.91	13.91	0.0823	17.16	22.5	0.0414	0.3602	100.61	0.999996	0.858782	0.0161002	0.125113	1.41497e-07	4.25421e-06	0.258526	0.360007	0.373815	0.00765264
	JS-Erz-3s	26	core	38.2	3.42	9.87	0.1329	26.83	21.64	<0.027	0.513	100.61	0.999993	0.611135	0.215614	0.172718	0.000526039	6.87849e-06	0.132172	0.58209	0.274461	0.0112769
	JS-Erz-3s	33	core	38.71	6.19	6.68	0.068	26.48	22.11	<0.027	0.5469	100.78	0.999995	0.562869	0.11342	0.32318	0.000526039	4.9045e-06	0.236634	0.567889	0.183587	0.0118899
	JS-Erz-3s	34	core	38.72	5.75	7.79	0.0995	25.75	21.92	<0.027	0.4079	100.46	0.999996	0.657518	0.0761274	0.266351	6.64589e-09	3.95003e-06	0.220948	0.555037	0.215116	0.00889792
	JS-Erz-3s	37	core	39.05	5.87	11.81	0.22	21.13	21.58	<0.026	0.466	100.11	0.999985	0.697464	0.0378065	0.264188	0.000526039	1.46335e-05	0.221629	0.447707	0.320662	0.0100021
	JS-Erz-3s	39	core	37.71	3.07	8.76	<0.024	28.66	21.31	<0.027	0.6257	100.15	0.999988	0.470454	0.342091	0.186917	0.000526039	1.1949e-05	0.118905	0.623265	0.244051	0.0137792
	JS-Erz-3s	42	core	39.08	7.17	8.72	0.0513	22.63	22.16	0.0316	0.393	100.23	0.999997	0.71308	0.0371853	0.249732	8.05181e-08	3.39601e-06	0.271941	0.481715	0.237866	0.00847739
	JS-Erz-3s	46	core	39.12	8.49	4.44	0.0511	25.88	22.27	<0.027	0.3586	100.62	0.999995	0.548964	0.0503294	0.400176	0.000526039	4.54148e-06	0.321508	0.549756	0.121023	0.00771354
	JS-Erz-3s	47	core	39.48	7.75	10.43	0.0595	20.01	22.36	0.0769	0.3951	100.56	0.999996	0.764129	0.0231074	0.212758	8.59426e-07	3.9713e-06	0.290326	0.420393	0.28087	0.00841117
	JS-Erz-3s	52	core	38.84	6.52	10.44	0.1874	21.66	21.97	<0.026	0.4268	100.05	0.999996	0.739276	0.03893	0.221264	0.000526039	4.08572e-06	0.246881	0.460051	0.283897	0.00917128
	JS-Erz-3s	54	core	39.47	6.14	13.08	0.0954	19.19	22.03	<0.027	0.3749	100.41	0.999992	0.800896	0.0233926	0.175177	0.000526039	7.86077e-06	0.231674	0.405886	0.354403	0.008038
	JS-Erz-3s	59	core	37.95	6.19	2.41	0.0564	31.48	21.57	<0.027	0.341	99.99	0.999989	0.372632	0.159477	0.467354	0.000526039	1.1079e-05	0.240057	0.685262	0.0671696	0.00751108
	JS-Erz-3s	62	core	39.04	6.27	9.29	0.1721	23.31	21.75	<0.026	0.4665	100.31	0.99999	0.641042	0.0492564	0.309692	1.9122e-08	9.82881e-06	0.238522	0.497446	0.253948	0.0100849
	JS-Erz-3s	64	core	39.45	7.26	10.48	0.0946	20.66	22.18	<0.026	0.4124	100.57	0.999994	0.736657	0.0270327	0.236304	6.19029e-08	5.70161e-06	0.272843	0.435388	0.282961	0.00880728
	JS-Erz-3s	65	core	37.59	1.4614	9.4	0.0385	29.88	21.54	<0.027	0.6599	100.59	0.999979	0.216958	0.743694	0.0388018	0.000526039	2.09921e-05	0.0576241	0.661202	0.26638	0.0147933
	JS-Erz-3s	66	core	38.65	5.14	8.94	0.1232	25.5	21.93	<0.027	0.5148	100.81	0.999995	0.641509	0.109403	0.248556	0.000526039	5.06277e-06	0.196537	0.546655	0.24563	0.0111786
	JS-Erz-3s	67	core	37.83	2.06	10.06	0.0386	28.14	21.74	<0.027	0.8236	100.7	0.999983	0.299596	0.627865	0.0719965	0.000526039	1.65833e-05	0.080766	0.617985	0.282931	0.0183181
	JS-Erz-3s	68	core	38.27	4	8.23	0.0851	27.39	21.87	<0.026	0.5131	100.38	0.999995	0.594266	0.207648	0.197555	0.000526039	4.82373e-06	0.156465	0.600704	0.231427	0.0114037
	JS-Erz-3s	73	core	38.46	4.89	9.1	0.1498	25.38	21.76	0.0322	0.4453	100.22	0.999995	0.674194	0.0981246	0.227677	6.36094e-09	4.62075e-06	0.188664	0.549187	0.252383	0.00976592
	JS-Erz-3s	77	core	38.54	4.48	9.35	0.0663	25.38	21.73	<0.027	0.445	100	0.999994	0.671982	0.110021	0.217465	0.000526039	6.10456e-06	0.17429	0.554346	0.261519	0.00984463
	JS-Erz-3s	79	core	38.87	5.88	8.06	0.1905	25.24	21.81	<0.027	0.499	100.57	0.999992	0.597204	0.0791594	0.323628	1.37979e-08	8.47123e-06	0.225101	0.542273	0.221771	0.0108554
	JS-Erz-3s	80	core	38.49	2.02	14.97	0.109	23.16	21.28	<0.026	0.6815	100.71	0.999922	0.543189	0.343989	0.112218	0.000526039	7.83456e-05	0.0770735	0.496787	0.411333	0.0148067
	JS-Erz-3s	81	core	38.65	5.49	9.26	0.0583	24.62	21.9	<0.026	0.4594	100.44	0.999996	0.681735	0.0784186	0.239316	0.000526039	4.18894e-06	0.209292	0.526951	0.253797	0.00995996
	JS-Erz-3s	84	core	38.24	6.06	2.78	0.0472	31.32	21.61	<0.027	0.5035	100.57	0.999977	0.301429	0.19302	0.505001	0.000526039	2.33337e-05	0.233836	0.678008	0.0771178	0.0110381
	JS-Erz-3s	86	core	37.59	3.34	5.99	0.0291	30.83	21.64	<0.027	0.6738	100.09	0.999991	0.352531	0.466804	0.180131	0.000526039	8.57404e-06	0.131706	0.683237	0.169933	0.0151237
	JS-Erz-3s	87	core	38.34	3.12	9.01	0.0604	28.44	21.69	<0.027	0.5451	101.22	0.999991	0.531194	0.295182	0.173088	0.000526039	9.42449e-06	0.120742	0.616831	0.250453	0.0119746
	JS-Erz-3s	88	core	39.31	5.35	14.43	0.0872	19.1	22.33	<0.026	0.356	100.97	0.999997	0.860166	0.0293023	0.110002	0.000526039	3.37116e-06	0.201001	0.402167	0.389242	0.00758932
	JS-Erz-3s	92	core	39.27	7.12	10.31	0.15	20.86	22.37	<0.026	0.4561	100.54	0.999996	0.747627	0.0364221	0.215421	0.000526039	3.79763e-06	0.268866	0.441673	0.279688	0.00977242
	JS-Erz-3s	96	core	39.51	7.28	12.05	0.1921	18.85	22.17	0.0305	0.3972	100.49	0.999993	0.781102	0.0197191	0.199172	1.00138e-07	6.55702e-06	0.272306	0.395464	0.323787	0.00844231
	JS-Erz-3s	99	core	38.84	5.87	8.01	0.1443	25.62	22.01	<0.027	0.4341	100.93	0.999996	0.652715	0.076774	0.269981	0.000526039	3.97865e-06	0.223566	0.547786	0.219247	0.00940106
	JS-Erz-3s	100	core	38.87	8.05	3.59	0.0812	27.2	22.22	0.0283	0.399	100.44	0.999994	0.477149	0.0800491	0.442795	1.68763e-07	6.33666e-06	0.308104	0.584294	0.098914	0.00868839
	JS-Erz-3s	101	core	38.49	5.4	5.78	0.1102	28.33	21.93	<0.026	0.3927	100.44	0.999996	0.588339	0.123452	0.288205	4.16921e-09	3.85135e-06	0.210251	0.619164	0.161886	0.00869886
	JS-Erz-3s	102	core	39.31	6.05	10.28	0.1464	22.38	22.2	<0.026	0.4452	100.83	0.999995	0.725556	0.0498592	0.224053	0.000526039	5.32723e-06	0.230385	0.478351	0.281619	0.00964404
	JS-Erz-3s	104	core	40.77	11.47	10.87	0.1324	14.07	22.79	0.032	0.2619	100.4	0.99999	0.831686	0.00341578	0.164886	1.91901e-06	9.98542e-06	0.419601	0.288892	0.286062	0.00544483
	JS-Erz-3s	105	core	38.82	5.15	9.09	0.1148	25.31	22.05	<0.026	0.4472	101.01	0.999996	0.685149	0.092504	0.222343	3.92833e-09	3.83949e-06	0.196954	0.543373	0.249942	0.00973106
	JS-Erz-3s	106	core	37.76	2.71	5.83	0.0605	32.44	21.41	<0.028	0.6399	100.86	0.99998	0.288438	0.546885	0.164131	0.000526039	2.01225e-05	0.106385	0.714773	0.164564	0.0142788
	JS-Erz-3s	109	core	39.14	5.26	14.05	0.1417	19.26	22.21	<0.026	0.4074	100.48	0.999995	0.835725	0.037185	0.12656	0.000526039	4.62476e-06	0.199444	0.409202	0.382587	0.00876624
	JS-Erz-3s	110	core	38.69	5.94	8.9	0.1861	24.38	21.69	<0.026	0.4715	100.25	0.999993	0.637192	0.0640402	0.298235	0.000526039	7.02332e-06	0.225952	0.5204	0.243448	0.0102
	JS-Erz-3s	111	core	38.31	3.47	7.27	0.0482	29.8	21.66	<0.027	0.5977	101.16	0.999988	0.451625	0.322755	0.225082	0.000526039	1.22402e-05	0.134793	0.649005	0.203022	0.0131798
	JS-Erz-3s	116	core	38.14	2.98	10.22	0.0458	27.11	21.75	<0.027	0.5583	100.8	0.999993	0.566508	0.296704	0.136255	0.000526039	6.7838e-06	0.115257	0.588391	0.28408	0.012272
	JS-Erz-3s	118	core	39.44	6.46	10.75	0.0955	21.59	22.4	<0.026	0.3989	101.16	0.999997	0.773084	0.0369183	0.189994	1.80016e-08	3.26564e-06	0.243488	0.456644	0.291319	0.00854957
	JS-Erz-3s	120	core	39.32	5.59	11.36	0.1347	21.96	22.3	<0.027	0.4031	101.08	0.999996	0.779832	0.0476101	0.172028	0.000526039	3.731e-06	0.212481	0.468295	0.310524	0.00870002
	JS-Erz-3s	124	core	39.38	6.19	13.82	0.1008	18.01	22.16	0.0539	0.4207	100.13	0.999992	0.819433	0.0246992	0.15586	1.25591e-07	7.78307e-06	0.233882	0.381702	0.375377	0.009039
	JS-Erz-3s	127	core	39.39	6.34	12.53	0.131	19.52	22.19	0.0343	0.4244	100.57	0.999994	0.789613	0.0293809	0.181	5.39545e-08	6.13244e-06	0.238962	0.412616	0.339332	0.00908985
	JS-Erz-3s	128	core	39.76	7.08	13.62	0.0846	17.29	22.27	0.0349	0.4325	100.56	0.99999	0.802639	0.0182034	0.179147	1.46143e-07	1.04605e-05	0.264035	0.361825	0.364974	0.0091658
	JS-Erz-3s	134	core	38.59	6.4	3.9	<0.024	29.56	21.94	<0.027	0.353	100.76	0.999995	0.500067	0.109016	0.390386	0.000526039	5.291e-06	0.246447	0.638	0.107831	0.00772124
	JS-Erz-3s	135	core	38.96	5.57	10.52	0.0819	22.96	22.07	<0.026	0.4234	100.59	0.999996	0.742669	0.0570554	0.199745	0.000526039	3.90606e-06	0.212203	0.490596	0.288038	0.00916333
	JS-Erz-3s	136	core	39.16	5.32	14.05	0.1518	19	21.96	<0.026	0.5095	100.16	0.999988	0.78057	0.0434188	0.175473	0.000526039	1.23375e-05	0.201658	0.404312	0.38305	0.0109799
	JS-Erz-3s	137	core	38.55	6.92	3.66	0.0432	28.81	22.07	<0.027	0.3559	100.41	0.999996	0.506716	0.103303	0.38945	0.000526039	4.41455e-06	0.266836	0.623842	0.101525	0.00779802
	JS-Erz-3s	138	core	39.23	6.18	8.48	0.1878	24.88	21.84	<0.026	0.3815	101.19	0.999993	0.650755	0.0470438	0.302194	8.87572e-09	6.80959e-06	0.233568	0.527808	0.230419	0.00820555
	JS-Erz-3s	140	core	39.19	5.37	12.55	0.1546	21.03	22.17	<0.026	0.3664	100.86	0.999996	0.815506	0.0384436	0.146047	5.63423e-09	3.61759e-06	0.203416	0.446949	0.341745	0.00789027
	JS-Erz-3s	141	core	40.04	8.49	13.75	0.5687	15.35	22.32	0.0336	0.3202	100.87	0.99999	0.840287	0.00700373	0.1527	3.11276e-07	9.63337e-06	0.312609	0.316914	0.363772	0.00670585
	JS-Erz-3s	142	core	39.61	6.69	13.95	0.1003	17.43	22.44	0.0358	0.4897	100.75	0.999992	0.814152	0.0256901	0.16015	1.5646e-07	7.78671e-06	0.249975	0.365169	0.374465	0.0103907
	JS-Erz-3s	144	core	39.15	6.1	8.93	0.102	24.21	22.22	<0.027	0.4552	101.18	0.999996	0.684703	0.0652534	0.249513	0.000526039	4.04192e-06	0.231311	0.515412	0.243468	0.00980866
	JS-Erz-3s	150	core	39.58	7.88	10.39	0.1081	19.9	22.11	<0.026	0.4233	100.4	0.999991	0.711199	0.0214075	0.266859	0.000526039	8.50311e-06	0.29439	0.417438	0.279174	0.00899709
	JS-Erz-3s	152	core	38.32	3.45	8.14	0.0496	28.51	21.77	<0.027	0.5093	100.76	0.999993	0.54915	0.263512	0.186805	0.000526039	7.09279e-06	0.13502	0.62501	0.228662	0.0113075
	JS-Erz-3s	154	core	38.27	4.04	7.51	<0.025	28.49	21.82	<0.027	0.5716	100.71	0.999993	0.524699	0.246121	0.228647	0.000526039	6.54303e-06	0.157008	0.620698	0.209677	0.0126173
	JS-Erz-3s	157	core	38.98	6.03	8.53	0.0532	24.75	22.05	<0.027	0.5817	100.97	0.999993	0.600667	0.0897049	0.309095	0.000526039	7.25832e-06	0.22844	0.526455	0.232581	0.0125236
	JS-Erz-3s	158	core	38.19	2.66	9.18	0.0632	28.8	21.68	<0.027	0.6052	101.19	0.999988	0.456427	0.406618	0.136418	0.000526039	1.17266e-05	0.103237	0.627234	0.25618	0.0133493
	JS-Erz-3s	160	core	38.57	4.17	7.98	0.0503	27.9	21.83	<0.027	0.4397	100.94	0.999995	0.615352	0.161289	0.222828	0.000526039	5.38241e-06	0.1616	0.606628	0.222096	0.00967596
	JS-Erz-3s	166	core	39.72	5.6	13.42	0.0931	19.34	22.35	0.0348	0.4948	101.05	0.99999	0.783632	0.0418451	0.174513	3.10977e-08	1.03295e-05	0.212276	0.411286	0.365774	0.0106642
	JS-Erz-3s	170	core	38.78	7.02	4.42	0.0789	28.09	22.06	<0.027	0.3716	100.85	0.999995	0.529201	0.0833799	0.387414	3.62353e-08	4.64744e-06	0.268441	0.602079	0.121414	0.00806653
	JS-Erz-3s	174	core	38.48	1.9	15.17	0.0583	22.59	21.55	<0.026	0.8078	100.58	0.999926	0.475784	0.438841	0.0847758	0.000526039	7.40998e-05	0.0734088	0.488508	0.420402	0.0176811
	JS-Erz-3s	175	core	38.31	6.01	4.87	0.0861	28.72	21.96	<0.027	0.2898	100.28	0.999998	0.633592	0.0896502	0.27623	0.000526039	1.8625e-06	0.233214	0.624687	0.135722	0.00637708
	JS-Erz-3s	178	core	38.22	3.16	8.51	0.0318	28.66	21.66	<0.027	0.5841	100.83	0.99999	0.495216	0.324138	0.180109	0.000526039	1.03884e-05	0.122947	0.626062	0.238064	0.0129277
	JS-Erz-3s	179	mantle	38.37	6.24	4.81	<0.024	28.79	21.95	<0.026	0.4101	100.58	0.999996	0.53557	0.117829	0.346071	0.000526039	3.65324e-06	0.239285	0.619229	0.13255	0.00893596
	JS-Erz-3s	180	core	38.51	6.03	7.6	0.111	25.97	21.93	<0.026	0.4503	100.61	0.999997	0.637784	0.0835795	0.278107	0.000526039	3.22467e-06	0.229235	0.553395	0.207647	0.00972314
	JS-Erz-3s	181	core	39.77	7.25	14.31	0.0799	16.33	22.42	<0.026	0.3323	100.51	0.999995	0.86378	0.0113989	0.12429	0.000526039	5.45519e-06	0.269544	0.340826	0.382601	0.00702871
	JS-Erz-3s	183	mantle	39.15	6.79	7.58	0.1436	25.26	21.81	<0.027	0.3427	101.07	0.999995	0.637686	0.0385909	0.323192	0.000526039	5.39285e-06	0.255334	0.532563	0.204794	0.00730936
	JS-Erz-3s	184	core	38.28	3.87	7.79	0.077	28.5	21.76	<0.027	0.6133	100.91	0.999992	0.502642	0.267693	0.229657	1.03783e-09	8.49573e-06	0.149773	0.619727	0.217004	0.0134962
	JS-Erz-3s	187	core	38.94	5.83	7.77	0.0773	25.67	21.98	<0.027	0.4327	100.69	0.999995	0.63685	0.0770182	0.285601	0.000526039	5.19278e-06	0.223762	0.552559	0.214244	0.00943475
	JS-Erz-3s	192	core	38.69	6.29	4.28	0.0704	29.31	21.93	<0.027	0.3663	100.94	0.999994	0.507929	0.105249	0.38629	0.000526039	5.70539e-06	0.241586	0.632123	0.118294	0.00799733
	JS-Erz-3s	195	core	38.83	6.05	8.45	0.1042	24.8	21.98	0.0393	0.3503	100.6	0.999997	0.715064	0.051621	0.233312	2.40322e-08	2.74782e-06	0.230717	0.530151	0.231547	0.00758544
	JS-Erz-3s	197	core	38.72	6.04	7.77	0.1105	25.46	22.08	0.0519	0.4605	100.68	0.999997	0.64863	0.0833777	0.267989	7.75957e-08	3.42753e-06	0.230701	0.545899	0.213403	0.00999651
	JS-Erz-3s	200	core	39.02	6.69	7.38	0.1158	25.08	22.1	<0.026	0.4088	100.81	0.999996	0.646425	0.0577042	0.295341	0.000526039	3.93633e-06	0.254405	0.535099	0.201661	0.00883513
	JS-Erz-3s	205	core	38.03	2.75	11.37	0.0531	26.17	21.46	<0.027	0.5914	100.41	0.999987	0.563038	0.296256	0.140168	0.000526039	1.27479e-05	0.105996	0.566025	0.315025	0.0129532
	JS-Erz-3s	206	core	39.38	7.11	10.38	0.1988	20.94	22	<0.026	0.4201	100.44	0.999992	0.710984	0.0278812	0.260601	0.000526039	7.72064e-06	0.267774	0.442201	0.281039	0.0089866
	JS-Erz-3s	208	core	38.79	4.78	9.53	0.1798	25.36	21.77	<0.027	0.4491	100.85	0.999993	0.666132	0.0931972	0.240138	0.000526039	6.74633e-06	0.182852	0.545065	0.262309	0.00977426
	JS-Erz-3s	210	core	39.05	5.32	11.61	0.1029	21.88	22.13	0.0458	0.5226	100.67	0.999994	0.733055	0.0692556	0.197683	3.77679e-08	6.26374e-06	0.202672	0.467898	0.318104	0.0113263
	JS-Erz-3s	216	core	39.03	4.87	13.39	0.0897	20.07	22.2	0.0624	0.5951	100.31	0.999991	0.760551	0.0776053	0.161835	6.23798e-08	8.66982e-06	0.186485	0.431614	0.368949	0.0129518
	JS-Erz-3s	217	core	38.91	5.95	11.36	0.0803	21.49	22.2	<0.027	0.4187	100.43	0.999997	0.785074	0.04476	0.170163	1.47841e-08	2.77629e-06	0.225246	0.456459	0.309278	0.00901647
	JS-Erz-3s	219	core	38	2.93	8.82	0.0866	28.6	21.4	<0.027	0.5849	100.43	0.999986	0.482115	0.338078	0.179266	0.000526039	1.42547e-05	0.114113	0.625632	0.247301	0.0129538
	JS-Erz-3s	221	core	39.59	7.48	13.39	0.079	16.97	22.69	0.0279	0.3562	100.59	0.999997	0.869038	0.0148861	0.116073	1.36558e-07	2.613e-06	0.278931	0.354853	0.358674	0.00754228
	JS-Erz-3s	224	core	39.67	5.76	13.5	0.0643	19.14	22.21	0.027	0.4134	100.78	0.999991	0.803729	0.0298298	0.166432	1.55291e-08	9.06584e-06	0.217686	0.40628	0.367157	0.00887797
	JS-Erz-3s	225	core	39.54	8.61	7.97	0.1547	22.14	22.13	0.0494	0.3723	100.96	0.999994	0.653424	0.0223642	0.324206	4.89045e-07	5.76618e-06	0.319259	0.460549	0.212346	0.00784578
	JS-Erz-3s	226	core	39.11	6.75	10.3	0.1146	21.43	22.35	<0.027	0.4312	100.48	0.999997	0.762268	0.0401636	0.19704	0.000526039	2.82025e-06	0.255544	0.455022	0.280167	0.00926681
	JS-Erz-3s	228	core	38.45	5.07	4.96	<0.023	30.23	22.04	<0.027	0.8	101.58	0.999987	0.343893	0.312522	0.343047	0.000526039	1.2618e-05	0.19475	0.650994	0.136807	0.0174495
	JS-Erz-3s	232	core	38.28	3.15	8.84	0.071	28.13	21.64	<0.027	0.4217	100.53	0.999993	0.609064	0.229197	0.161206	0.000526039	6.55289e-06	0.123304	0.618362	0.248953	0.00938181
	JS-Erz-3s	235	core	38.63	6.81	4.52	0.0761	27.85	21.93	<0.027	0.4531	100.28	0.999993	0.480736	0.101881	0.41685	0.000526039	7.43388e-06	0.262407	0.602386	0.125282	0.00992577
	JS-Erz-3s	236	core	38.69	6.43	3.82	0.0585	29.69	22	<0.027	0.4409	101.14	0.999992	0.437494	0.134892	0.42708	0.000526039	8.17253e-06	0.246519	0.638588	0.105295	0.00959795
	JS-Erz-3s	240	core	39.32	6.82	11.83	0.2079	19.63	22.32	<0.026	0.3391	100.47	0.999997	0.824987	0.0215967	0.152887	0.000526039	2.76567e-06	0.257174	0.415141	0.320427	0.00725747
	JS-Erz-5s	1	core	39.7	5.99	14.38	0.1115	17.88	22.47	<0.026	0.3327	100.88	0.999996	0.869152	0.01929	0.111028	0.000526039	4.19434e-06	0.225638	0.377848	0.389389	0.00712541
	JS-Erz-5s	2	core	39.16	5.34	8.63	0.0679	25.57	22	<0.026	0.5079	101.31	0.999992	0.615223	0.0953743	0.288868	0.000526039	8.4454e-06	0.203973	0.547989	0.237022	0.0110165
	JS-Erz-5s	4	core	39.37	7.13	9.43	0.0489	21.92	22.3	<0.026	0.3957	100.62	0.999996	0.733319	0.0337508	0.232401	0.000526039	3.73662e-06	0.269878	0.465244	0.256376	0.00850142
	JS-Erz-5s	18	core	38.4	1.84	10.43	0.0563	27.87	21.69	<0.028	1.2769	101.55	0.999893	0.176047	0.751809	0.0715102	0.000526039	0.000106927	0.0714751	0.60854	0.291745	0.0282393
	JS-Erz-5s	20	core	39.14	5.88	11.06	0.1306	21.82	22.02	0.0335	0.4745	100.54	0.999993	0.723543	0.0498539	0.226596	3.10573e-08	6.90329e-06	0.223161	0.46478	0.301816	0.0102434
	JS-Erz-5s	23	core	39.4	8.76	2.49	<0.023	27.88	22.53	<0.026	0.4452	101.54	0.999985	0.359791	0.0966098	0.543584	3.30089e-07	1.519e-05	0.331206	0.591558	0.0676782	0.0095585
	JS-Erz-5s	29	core	39.3	6.16	10.72	0.1053	21.85	22.36	<0.026	0.5315	101.03	0.999995	0.720336	0.0589485	0.220185	0.000526039	5.15819e-06	0.233008	0.463848	0.291719	0.0114252
	JS-Erz-5s	32	core	39.31	5.83	10.53	0.0846	22.87	22.23	<0.027	0.4628	101.33	0.999995	0.722394	0.0570326	0.220042	0.000526039	4.91923e-06	0.22022	0.484152	0.285705	0.00992238
	JS-Erz-5s	34	core	39.54	6.67	11.71	0.0482	19.98	22.26	0.0297	0.4176	100.67	0.999994	0.772602	0.0285129	0.198879	5.23037e-08	5.98164e-06	0.251428	0.422432	0.317199	0.00894151
	JS-Erz-5s	38	core	39.42	7.68	8	0.1951	22.91	22.07	<0.026	0.4312	100.74	0.999992	0.628304	0.0348094	0.336879	6.84828e-08	7.63877e-06	0.289484	0.484579	0.216698	0.00923956
	JS-Erz-5s	44	core	39.18	5.51	9.37	0.1192	24.43	22.05	<0.027	0.5485	101.2	0.999991	0.631635	0.088083	0.279747	0.000526039	8.68276e-06	0.2098	0.52183	0.256496	0.0118742
	JS-Erz-5s	45	core	39.18	8.71	1.1789	0.107	29.13	22.34	0.0362	0.4952	101.18	0.999901	0.185991	0.150136	0.663773	1.11257e-06	9.86418e-05	0.332601	0.624277	0.0323711	0.0107512
	JS-Erz-5s	47	core	40.02	6.91	12.39	0.0562	18.75	22.44	<0.026	0.4268	101.01	0.999991	0.781191	0.0231788	0.195095	0.000526039	9.04451e-06	0.259919	0.395915	0.335044	0.00912231
	JS-Erz-5s	48	core	38.93	7.07	2.55	<0.024	29.62	22.07	<0.027	0.5534	100.81	0.999967	0.286624	0.162342	0.550476	0.000526039	3.26263e-05	0.273687	0.643198	0.0709434	0.0121713
	JS-Erz-5s	50	core	39.91	7.03	11.1	0.0641	20.37	22.45	<0.027	0.3625	101.3	0.999995	0.780029	0.0231723	0.196268	0.000526039	4.78959e-06	0.263857	0.428956	0.29945	0.00773691
	JS-Erz-5s	54	core	39.06	6.78	5.65	0.0401	26.91	22.08	<0.027	0.4612	101	0.999993	0.530106	0.0830844	0.386276	0.000526039	7.04451e-06	0.258753	0.576192	0.155052	0.0100033
	JS-Erz-5s	55	core	39.84	7	12.54	0.093	18.76	22.55	0.0356	0.3897	101.2	0.999995	0.816609	0.0214117	0.161974	1.03678e-07	4.6046e-06	0.261605	0.393324	0.336801	0.00826997
	JS-Erz-5s	62	core	39.68	5.22	16.12	0.0803	17.16	22.22	<0.026	0.3414	100.84	0.999991	0.874129	0.0203939	0.105468	4.02722e-09	8.6449e-06	0.196147	0.361516	0.43505	0.00728688
	JS-Erz-5s	63	core	39.35	7.61	3.9	0.0395	28.06	22.21	<0.027	0.3714	101.54	0.999992	0.472654	0.0710589	0.455753	0.000526039	8.47618e-06	0.288692	0.597065	0.106237	0.00800534
	JS-Erz-5s	75	core	38.94	5.21	7.44	0.0953	27.46	21.92	<0.027	0.5654	101.66	0.99999	0.535184	0.136293	0.328513	7.78203e-09	9.52242e-06	0.198219	0.58603	0.203526	0.0122249
	JS-Erz-5s	79	core	38.79	7.69	2.54	0.0414	29.43	22.23	<0.026	0.3957	101.13	0.999991	0.387733	0.120517	0.491215	0.000526039	9.38948e-06	0.29293	0.628894	0.0696187	0.00855695
	JS-Erz-5s	85	core	39.52	6.2	12.14	0.0889	20.32	22.23	0.0401	0.4144	100.96	0.999994	0.779728	0.0320469	0.188219	5.09978e-08	5.9635e-06	0.233599	0.429097	0.328436	0.00886811
	JS-Erz-5s	86	core	39.58	7.33	12.19	0.0666	18.45	22.3	0.0637	0.3976	100.37	0.999994	0.796701	0.0193794	0.183913	4.57112e-07	5.91326e-06	0.274963	0.388104	0.32846	0.00847317
	JS-Erz-5s	87	mantle	38.4	3.13	10.46	0.0458	25.97	21.73	<0.027	0.7309	100.46	0.999983	0.511395	0.316466	0.171595	0.000526039	1.73633e-05	0.122012	0.568387	0.293399	0.0162014
	JS-Erz-5s	89	core	39.49	5.81	14.77	0.1129	17.75	22.19	0.0462	0.3913	100.57	0.999992	0.84232	0.0231697	0.134502	5.14798e-08	7.7229e-06	0.218391	0.374172	0.399083	0.00835368
	JS-Erz-5s	96	core	39.07	6.1	8.19	0.0535	25.11	22.08	<0.027	0.5463	101.15	0.999993	0.600342	0.0854607	0.313664	0.000526039	6.90158e-06	0.231092	0.534017	0.223129	0.011762
	JS-Erz-5s	107	core	39.44	6.02	13.44	0.113	19.22	22.32	0.061	0.3896	101	0.999996	0.828609	0.0276669	0.14372	9.84533e-08	4.37146e-06	0.225485	0.404181	0.362037	0.008296
	JS-Erz-5s	110	core	39.25	3.53	19.6	0.1439	15.45	22.24	0.0481	0.3426	100.62	0.999989	0.916782	0.0326416	0.0505659	2.37183e-09	1.08384e-05	0.133373	0.32728	0.531996	0.0073505
	JS-Erz-5s	135	core	38.97	5.27	7.85	0.057	25.12	21.12	<0.027	0.5567	98.97	0.999933	0.464198	0.0765395	0.459196	5.75543e-09	6.73929e-05	0.208083	0.556636	0.222789	0.0124918
	JS-Erz-5s	136	core	39.32	8.23	3.16	0.1625	27.36	22.34	<0.027	0.3495	100.95	0.999991	0.460358	0.0695405	0.469566	0.000526039	9.01476e-06	0.315717	0.589416	0.0872397	0.00762715
	JS-Erz-5s	138	core	39.18	5.75	9.83	0.0939	23.61	22.11	<0.026	0.4978	101.1	0.999994	0.679673	0.0689863	0.251334	1.14948e-08	6.24381e-06	0.218394	0.502705	0.268165	0.0107366
	JS-Erz-5s	140	core	39.64	10.05	3.67	0.0821	24.28	22.64	<0.027	0.4907	100.86	0.999988	0.44366	0.0537563	0.502046	0.000526039	1.17802e-05	0.377986	0.512229	0.0993029	0.010482
	JS-Erz-5s	142	core	39.8	6.43	13.92	0.0976	17.51	22.48	<0.026	0.3626	100.64	0.999994	0.852165	0.0186452	0.129184	3.09989e-08	5.69778e-06	0.242932	0.371197	0.378081	0.00778994
	JS-Erz-5s	143	core	39.44	6.39	11.67	0.0575	20.42	22.35	<0.027	0.3936	100.73	0.999996	0.794815	0.0313378	0.173318	0.000526039	3.88088e-06	0.24146	0.433027	0.317052	0.00846029
	JS-Erz-5s	156	core	39.79	6.47	13.62	0.0494	17.83	22.45	<0.026	0.4285	100.65	0.999992	0.821135	0.0237432	0.154588	0.000526039	7.6893e-06	0.244103	0.377463	0.369253	0.00918107
	JS-Erz-5s	157	core	40.07	6.14	15.26	0.4224	16.44	22.54	<0.026	0.4677	101.36	0.999986	0.836911	0.0231482	0.139927	3.3521e-08	1.36723e-05	0.230783	0.346849	0.412378	0.00998939
	JS-Erz-5s	158	core	39.66	5.95	14.12	0.0878	17.8	22.38	0.0705	0.3936	100.46	0.999993	0.842763	0.0241808	0.133049	1.40266e-07	6.99136e-06	0.226053	0.379615	0.385838	0.00849382
	JS-Erz-5s	166	core	39	7.79	2.25	<0.024	28.93	22	<0.027	0.6335	100.63	0.999934	0.227471	0.14208	0.629858	0.000526039	6.58492e-05	0.299647	0.624404	0.0621056	0.013844
	JS-Erz-5s	187	core	39.64	5.36	14.15	0.1218	18.92	22.31	<0.026	0.4388	100.96	0.999991	0.816862	0.0362228	0.146381	0.000526039	8.66929e-06	0.20297	0.402253	0.385324	0.00945294
	JS-Erz-5s	195	core	39.25	5.37	13.54	0.1178	19.71	22.11	0.032	0.4305	100.56	0.999993	0.805563	0.0389364	0.155494	1.54364e-08	6.77984e-06	0.203172	0.418823	0.368737	0.00926835
	JS-Erz-5s	196	core	39.32	6.97	8.88	0.1108	22.62	22.36	<0.027	0.4839	100.75	0.999995	0.685635	0.0507342	0.2631	0.000526039	4.6286e-06	0.264752	0.482311	0.242494	0.0104428
	JS-Erz-5s	200	core	38.89	2.73	14.48	0.1186	22.64	22	<0.026	0.3402	101.19	0.999994	0.806115	0.117803	0.0755502	0.000526039	5.71798e-06	0.10494	0.487768	0.399873	0.00741929
	JS-Erz-5s	201	core	39	5.82	7.75	0.161	26	21.75	0.0365	0.5226	101.04	0.999988	0.551359	0.0847418	0.363887	2.76319e-08	1.20242e-05	0.221515	0.555113	0.212064	0.0113079
	JS-Erz-5s	205	core	39.14	8.02	2.94	<0.023	27.95	22.1	<0.026	0.4432	100.62	0.99998	0.361897	0.0884217	0.549136	0.000526039	1.99414e-05	0.307708	0.601673	0.0809493	0.00967034
	JS-Erz-5s	206	core	39.53	6.19	12.58	0.0523	19.28	22.48	0.0279	0.4161	100.56	0.999996	0.817766	0.0317239	0.150505	3.45063e-08	4.40155e-06	0.23569	0.411364	0.343952	0.00899386
	JS-Erz-5s	216	core	39.04	8.08	2.92	0.0534	28.06	22.33	<0.026	0.3498	100.86	0.999993	0.456371	0.0843003	0.459322	8.49393e-08	7.03572e-06	0.309347	0.602608	0.080437	0.007608
	JS-Erz-5s	223	core	38.97	5.72	9.41	0.1376	24.14	21.93	0.0276	0.4976	100.83	0.999993	0.655569	0.0720828	0.272342	1.66276e-08	6.83617e-06	0.217528	0.514701	0.257019	0.010752
	JS-Erz-5s	231	core	39.52	7.27	10.59	0.0678	20.35	22.36	0.0266	0.4263	100.61	0.999995	0.753278	0.0288368	0.21788	8.47175e-08	4.84787e-06	0.274009	0.430181	0.286676	0.00913364
	JS-Erz-5s	240	core	38.91	8.05	3.26	0.0336	27.72	22.13	<0.026	0.4332	100.56	0.999989	0.412948	0.0877896	0.499252	1.00274e-07	1.06866e-05	0.307441	0.593731	0.0894344	0.00939311
	JS-Erz-5s	249	core	39.37	6.78	9.86	0.0646	21.96	22.22	<0.026	0.4789	100.76	0.999994	0.697751	0.0436126	0.25863	3.95853e-08	6.10896e-06	0.256376	0.465639	0.267697	0.0102883
	JS-Erz-5s	251	core	39.43	5.68	14.68	0.1136	18.25	22.39	<0.027	0.3916	100.94	0.999996	0.855022	0.027236	0.117211	0.000526039	4.43254e-06	0.212664	0.383524	0.395468	0.00834398
	JS-Erz-5s	252	core	38.81	7.66	3.48	0.0839	28.06	21.91	<0.027	0.3874	100.39	0.999989	0.430552	0.0777134	0.491198	0.000526039	1.06005e-05	0.293046	0.602724	0.0957972	0.00843215
	JS-Erz-5s	263	core	38.48	4.08	6.58	0.0641	28.99	21.66	<0.027	0.5428	100.41	0.999986	0.483142	0.232249	0.284069	0.000526039	1.36157e-05	0.160904	0.64058	0.186372	0.0121437
	JS-Erz-5s	264	core	39.54	6.47	12.5	0.0749	19.01	22.31	0.097	0.3665	100.37	0.999995	0.81998	0.0230316	0.156983	3.38855e-07	4.95296e-06	0.2458	0.405084	0.341203	0.00791389
	JS-Erz-5s	266	core	39.73	6.36	11.89	0.0513	20.17	22.37	<0.027	0.4166	101.01	0.999994	0.778586	0.0312958	0.189586	0.000526039	6.20881e-06	0.240352	0.427777	0.322926	0.00894412
	JS-Erz-5s	278	core	39.67	6.13	14.26	0.096	17.78	22.38	0.0414	0.3447	100.7	0.999995	0.858842	0.018911	0.122242	4.75145e-08	5.15313e-06	0.230864	0.375697	0.386055	0.00738365
	JS-Erz-5s	281	core	39.55	9.71	2.12	0.026	26.92	22.49	<0.026	0.458	101.29	0.99997	0.303804	0.0778236	0.617817	0.000526039	2.99854e-05	0.365169	0.567745	0.0573075	0.00977893
	JS-Erz-5s	282	core	39	7.88	3.52	<0.024	27.75	22.3	<0.026	0.4952	100.97	0.999991	0.417063	0.105486	0.477442	1.42252e-07	9.42426e-06	0.300035	0.592736	0.0965113	0.0107179
	JS-Erz-5s	295	core	39.36	8.93	3.63	0.0595	26.61	22.41	<0.026	0.3398	101.34	0.999995	0.504779	0.0514832	0.443206	0.000526039	5.47922e-06	0.334898	0.560154	0.0976993	0.00724866
	JS-Erz-5s	296	core	39.2	6.96	8.59	0.0701	23.37	22.07	<0.027	0.3831	100.64	0.999996	0.690377	0.0378835	0.27121	0.000526039	4.28634e-06	0.262948	0.495391	0.233437	0.00822336
	JS-Erz-5s	305	core	39.15	5.64	11.18	0.0826	21.47	22.12	<0.028	0.5086	100.15	0.999993	0.727801	0.0591493	0.212517	0.000526039	7.42557e-06	0.21669	0.46328	0.308909	0.0111201
	JS-Erz-5s	309	core	39.68	8.17	9	0.0613	20.97	22.64	0.0264	0.5652	101.1	0.999994	0.67318	0.0411178	0.285696	3.5994e-07	5.78012e-06	0.305713	0.440233	0.242036	0.0120185
	JS-Erz-5s	311	core	38.2	2.93	8.95	0.0587	27.79	21.6	<0.027	0.603	100.15	0.999985	0.489381	0.344697	0.165382	0.000526039	1.45302e-05	0.115856	0.616328	0.254277	0.013539
	JS-Erz-5s	319	core	39.8	9.43	5.76	0.085	23.23	22.3	<0.026	0.4921	101.11	0.999986	0.497519	0.0341021	0.467839	0.000526039	1.37243e-05	0.350781	0.484704	0.154119	0.010396
	JS-Erz-5s	321	core	39.25	5.18	13.37	0.105	20.07	21.98	0.0615	0.425	100.43	0.999991	0.79213	0.0407799	0.167082	3.51851e-08	8.73904e-06	0.196929	0.428374	0.36551	0.00918777
	JS-Erz-5s	333	core	38.52	3.45	9.4	0.0662	27.3	21.73	<0.027	0.5328	101.02	0.99999	0.580504	0.226863	0.192097	0.000526039	9.59535e-06	0.133416	0.593199	0.261661	0.0117239
	JS-Erz-5s	339	core	39	5.02	12.37	0.1145	21.35	21.95	0.0546	0.4905	100.35	0.999992	0.749592	0.0623081	0.188092	2.98915e-08	8.1818e-06	0.191702	0.457751	0.339896	0.010652
	JS-Erz-5s	340	core	39.54	6.57	13.87	0.0712	17.76	22.17	<0.026	0.3479	100.33	0.999994	0.837855	0.0163656	0.145247	0.000526039	6.29006e-06	0.246204	0.373032	0.373363	0.00740103
	JS-Erz-5s	360	core	39.62	6.39	15.66	0.062	16.11	22.44	<0.027	0.3939	100.67	0.999994	0.870601	0.0168914	0.111975	0.000526039	6.4923e-06	0.237548	0.335907	0.41823	0.00831501
	JS-Erz-5s	364	core	38.71	7.93	3.08	0.0744	28.03	22.18	0.0372	0.3662	100.41	0.999994	0.461564	0.0892465	0.449183	2.26159e-07	6.09225e-06	0.304148	0.602956	0.0849211	0.00797491
	JS-Erz-5s	367	core	38.38	4.47	7	0.0631	28.15	21.79	<0.027	0.6949	100.55	0.999988	0.460493	0.246965	0.292004	0.000526039	1.18056e-05	0.174163	0.614585	0.195892	0.0153604
	JS-Erz-5s	369	core	38.86	7.45	4.87	0.0485	26.7	22.17	0.0345	0.4227	100.56	0.999995	0.539563	0.0766643	0.383768	1.39406e-07	4.72033e-06	0.284662	0.572324	0.133831	0.00918318
	JS-Erz-5s	373	core	38.53	5.94	7.36	0.0878	25.73	21.61	<0.027	0.5144	99.79	0.999991	0.557473	0.0865494	0.355442	0.000526039	9.4698e-06	0.228845	0.5561	0.203787	0.011268
	JS-Erz-5s	384	core	38.35	5.89	5.32	0.0612	28.45	21.93	<0.027	0.5118	100.52	0.999995	0.504211	0.148808	0.34645	0.000526039	5.16717e-06	0.226782	0.614603	0.147425	0.0111897
	JS-Erz-5s	392	core	38.63	3.85	9.49	0.2185	26.53	21.46	0.0275	0.4881	100.68	0.999985	0.603843	0.147539	0.248603	7.72217e-10	1.4995e-05	0.148898	0.57625	0.264114	0.010738
	JS-Erz-5s	404	core	39.59	6.49	11.38	0.2069	20.15	22.07	0.066	0.395	100.35	0.999991	0.753694	0.0269586	0.219338	1.48377e-07	9.19353e-06	0.247734	0.431558	0.312148	0.00856052
	JS-Erz-5s	412	core	39.45	6.1	12.45	0.0643	20.33	22.35	0.0462	0.4163	101.22	0.999996	0.799041	0.034341	0.166614	6.55932e-08	4.18157e-06	0.228675	0.427169	0.335301	0.00885513
	JS-Erz-5s	420	core	39.18	5.39	11.46	0.0805	22.02	21.86	<0.026	0.4894	100.5	0.999989	0.705717	0.0560391	0.237707	0.000526039	1.11411e-05	0.205304	0.470336	0.313779	0.0105813
	JS-Erz-5s	421	core	38.37	3.08	10.23	0.0834	27.08	21.68	<0.027	0.5805	101.11	0.999989	0.55833	0.276702	0.164431	0.000526039	1.08012e-05	0.118774	0.585254	0.283267	0.0127056
	JS-Erz-5s	422	core	38.89	8.57	2.11	0.0467	28.6	22.04	<0.026	0.3477	100.61	0.999982	0.342959	0.080873	0.575624	0.000526039	1.80186e-05	0.325473	0.609516	0.0575046	0.00750708
	JS-Erz-5s	433	core	38.67	6.97	3.89	0.055	28.22	21.95	<0.027	0.3782	100.17	0.999993	0.485863	0.0922006	0.421404	0.000526039	6.96694e-06	0.27003	0.613264	0.108381	0.00832538
	JS-Erz-5s	436	core	38.98	5.52	11.42	0.0942	22.17	22	<0.027	0.4307	100.63	0.999995	0.754176	0.0510477	0.194245	0.000526039	4.73321e-06	0.209002	0.470958	0.310773	0.00926692
	JS-Erz-5s	443	core	38.53	6.27	3.76	0.0597	29.9	22.05	<0.027	0.3639	100.92	0.999996	0.498999	0.129853	0.370618	0.000526039	4.43476e-06	0.241462	0.646345	0.104222	0.00797092
	JS-Erz-5s	445	core	39.07	8.07	3.57	0.048	27.46	22.13	<0.027	0.4533	100.82	0.999988	0.413019	0.0810028	0.505966	1.1756e-07	1.20402e-05	0.306827	0.585867	0.0975058	0.0098005
	JS-Erz-5s	460	core	39.05	7.95	3.5	0.0438	27.48	22.19	<0.026	0.3983	100.63	0.999991	0.451959	0.0787152	0.469317	9.23256e-08	8.84852e-06	0.304445	0.59048	0.0964049	0.00866975
	JS-Erz-5s	470	core	39.36	6.43	9.42	0.1144	22.92	22.21	0.0299	0.442	100.93	0.999995	0.698782	0.048415	0.252798	3.71174e-08	5.35201e-06	0.244351	0.488702	0.257397	0.00954993
	JS-Erz-5s	474	core	38.72	7.77	2.29	<0.024	29.42	22.21	<0.027	0.2407	100.65	0.999995	0.488912	0.0820202	0.428538	0.000526039	4.54773e-06	0.298039	0.633625	0.0630788	0.00525657
	JS-Erz-5s	475	core	38.93	8.28	3.66	0.0362	26.98	22	<0.026	0.3981	100.3	0.99999	0.442704	0.0639092	0.493377	1.01201e-07	1.00147e-05	0.315306	0.576014	0.100068	0.00861282
	JS-Erz-5s	490	core	39.24	6.42	11.23	0.0725	20.81	22.07	<0.026	0.3862	100.23	0.999995	0.768985	0.0302898	0.200194	0.000526039	5.00175e-06	0.243099	0.442634	0.305953	0.00831393
	JS-Erz-5s	493	core	39.78	6.19	15.31	0.0859	16.67	22.48	0.0314	0.4737	101.02	0.99999	0.839639	0.0242335	0.136118	6.99604e-08	9.84122e-06	0.230869	0.348714	0.410378	0.0100392
	JS-Erz-5s	499	core	39.2	7.37	9.29	0.0473	21.66	22.28	<0.026	0.4117	100.28	0.999997	0.730577	0.0339785	0.234915	0.000526039	3.42975e-06	0.278979	0.459642	0.252529	0.00885015
	JS-Erz-5s	508	core	39.62	6.31	12.51	0.1115	19.48	22.32	0.0921	0.3788	100.83	0.999995	0.80977	0.0257616	0.164463	2.49958e-07	5.3322e-06	0.238677	0.413082	0.340106	0.00813444
	JS-Erz-5s	530	core	38.29	3.92	8.42	0.0587	27.77	21.91	<0.027	0.3835	100.76	0.999998	0.674587	0.160536	0.164348	0.000526039	2.48396e-06	0.152301	0.604367	0.234874	0.00845747
	JS-Erz-5s	537	core	37.85	2.06	7.12	0.1535	32.29	21.15	<0.027	0.6046	101.23	0.999961	0.276904	0.595948	0.126583	0.000526039	3.8886e-05	0.0801507	0.706814	0.199633	0.0134025
	JS-Erz-5s	538	core	38.14	3.19	9.69	0.0453	26.64	21.56	<0.027	0.5587	99.81	0.999989	0.568195	0.259365	0.171903	0.000526039	1.08573e-05	0.125469	0.587979	0.274055	0.0124966
	JS-Erz-5s	554	core	39.1	6.16	10.72	0.0909	21.77	22.06	0.0261	0.5166	100.44	0.999993	0.704514	0.0526933	0.242786	3.41244e-08	6.99165e-06	0.233477	0.463135	0.292262	0.0111259
	JS-Erz-5s	575	core	37.88	3.91	8.46	0.0897	27.32	21.47	<0.027	0.625	99.76	0.999991	0.527504	0.237012	0.234949	0.000526039	9.14407e-06	0.152241	0.5972	0.236727	0.0138325
	JS-Erz-5s	577	core	39	5.68	7.86	0.0854	25.79	21.99	<0.027	0.5488	100.97	0.999991	0.578024	0.102622	0.318819	0.000526039	8.49602e-06	0.217547	0.554303	0.216212	0.0119376
	JS-Erz-5s	578	core	39.49	7.47	6.58	0.1802	24.53	22.04	<0.027	0.5091	100.8	0.999985	0.519209	0.0531483	0.427102	0.000526039	1.45396e-05	0.284479	0.524226	0.180271	0.011024
	JS-Erz-5s	579	core	39	5.7	7.9	0.0789	26.14	21.58	<0.026	0.3868	100.8	0.99999	0.604685	0.0591524	0.335627	0.000526039	9.59256e-06	0.217183	0.558257	0.21619	0.00836972
	JS-Erz-6s	1	core	39.14	5.72	15.14	0.16	16.97	22.15	0.0503	0.3779	99.7	0.999994	0.866781	0.0219297	0.111284	6.6834e-08	5.98568e-06	0.217098	0.361552	0.413202	0.00814742
	JS-Erz-6s	3	core	39.25	6.7	8.9	0.0518	23.02	22.21	0.0311	0.465	100.63	0.999995	0.679032	0.0510877	0.269875	6.30887e-08	5.23884e-06	0.254962	0.491546	0.243434	0.0100581
	JS-Erz-6s	5	core	38.86	7.36	2.64	0.0259	29.02	22.11	0.039	0.5532	100.61	0.999974	0.305498	0.151678	0.542798	3.20191e-07	2.57068e-05	0.284759	0.629662	0.0734158	0.0121632
	JS-Erz-6s	6	core	39.35	1.88	26.27	0.2692	9.64	22.11	<0.026	0.2983	99.83	0.99978	0.954165	0.0307677	0.0143207	0.000526039	0.000220242	0.0715181	0.205197	0.716852	0.00643329
	JS-Erz-6s	8	core	38.94	5.01	13.4	0.0639	20.07	22.18	0.0437	0.4041	100.11	0.999996	0.829809	0.0459409	0.124247	1.7649e-08	3.7429e-06	0.191762	0.430795	0.368657	0.00878629
	JS-Erz-6s	9	core	38.57	7.06	3.61	0.0427	28.77	21.96	<0.027	0.5104	100.55	0.999989	0.394955	0.129142	0.475366	0.000526039	1.08925e-05	0.270705	0.618589	0.0995851	0.0111203
	JS-Erz-6s	10	core	38.68	5.74	6.54	0.1434	26.83	21.84	<0.026	0.4273	100.22	0.999994	0.587727	0.0943391	0.317402	0.000526039	5.98311e-06	0.223222	0.58474	0.182605	0.00943238
	JS-Erz-6s	12	core	39.37	5.7	14.78	0.1115	17.87	22.25	0.0497	0.3351	100.47	0.999996	0.870157	0.0205843	0.109254	4.02563e-08	4.42655e-06	0.214793	0.377716	0.400326	0.0071653
	JS-Erz-6s	13	core	38.79	5.38	9.4	0.0961	24.77	21.92	0.0392	0.5174	100.9	0.999994	0.650819	0.0905339	0.258641	2.32265e-08	5.87627e-06	0.204416	0.527743	0.256677	0.0111635
	JS-Erz-6s	22	core	39	8.13	3.46	<0.023	27.71	22.12	<0.026	0.3549	100.81	0.999993	0.465758	0.0668062	0.467428	7.3824e-08	7.29686e-06	0.308389	0.589738	0.0942254	0.00764752
	JS-Erz-6s	25	core	38.42	4.43	8.52	0.0776	27.03	21.72	<0.027	0.4501	100.65	0.999995	0.634457	0.134284	0.230727	0.000526039	5.07718e-06	0.17047	0.584041	0.235639	0.00985009
	JS-Erz-6s	27	core	37.7	1.92	7.6	0.0539	30.89	21.43	<0.027	0.8959	100.49	0.999956	0.180499	0.742904	0.0760274	0.000526039	4.38233e-05	0.0761175	0.687065	0.216642	0.0201753
	JS-Erz-6s	28	core	38.99	6.21	9.01	0.1248	23.45	22	<0.027	0.5367	100.33	0.999992	0.638862	0.0683879	0.292217	0.000526039	7.57595e-06	0.237535	0.503094	0.247711	0.0116599
	JS-Erz-6s	29	core	38.63	5.85	6.03	0.0695	27.63	21.81	<0.027	0.6675	100.7	0.999986	0.44196	0.150555	0.406946	0.000526039	1.35186e-05	0.224613	0.594651	0.166177	0.0145592
	JS-Erz-6s	34	core	38.67	4.3	11.95	0.1113	23.05	21.59	0.0425	0.5058	100.23	0.999988	0.699908	0.0919068	0.208173	5.51594e-09	1.1829e-05	0.16486	0.495241	0.328892	0.0110072
	JS-Erz-6s	36	core	39.17	6.55	10.09	0.1154	21.85	21.88	0.0413	0.5638	100.26	0.999987	0.638203	0.049507	0.312277	1.29008e-07	1.30243e-05	0.248333	0.464649	0.274875	0.0121429
	JS-Erz-6s	40	core	38.77	5.2	8.52	0.1116	25.89	21.62	<0.026	0.5234	100.64	0.999988	0.578113	0.0980719	0.323277	0.000526039	1.17906e-05	0.198751	0.555675	0.234195	0.0113785
	JS-Erz-6s	43	core	39.56	6.09	13.27	0.0793	18.97	22.2	<0.026	0.4136	100.61	0.999992	0.802933	0.0272902	0.169243	0.000526039	7.79588e-06	0.229621	0.401586	0.359928	0.00886489
	JS-Erz-6s	44	core	39.39	5.69	13.74	0.0953	18.82	22.21	0.0469	0.4129	100.41	0.999993	0.822511	0.030836	0.146646	4.78125e-08	6.67061e-06	0.215993	0.400414	0.374689	0.00890366
	JS-Erz-6s	46	core	38.38	5.42	4.77	<0.023	29.51	22.02	<0.027	0.6471	100.77	0.999991	0.406506	0.242083	0.350876	0.000526039	8.79812e-06	0.210151	0.642492	0.133079	0.0142776
	JS-Erz-6s	47	mantle	39.57	6.4	12.55	0.0631	19.66	22.27	0.0439	0.4149	100.98	0.999994	0.790582	0.0280863	0.181326	8.09509e-08	6.00097e-06	0.239912	0.413293	0.337968	0.00882665
	JS-Erz-6s	50	core	39.29	5.86	11.06	0.072	21.5	22.12	<0.027	0.4249	100.33	0.999994	0.751383	0.0435689	0.204516	0.000526039	6.09667e-06	0.224325	0.461905	0.304525	0.00924481
	JS-Erz-6s	51	core	37.96	2.97	6.25	0.0393	31.54	21.47	<0.027	0.5591	100.79	0.999985	0.377304	0.430071	0.192084	0.000526039	1.48076e-05	0.116651	0.694407	0.176476	0.012465
	JS-Erz-6s	57	core	39.01	5.73	10.56	0.0756	22.57	22.03	0.0301	0.4894	100.49	0.999994	0.709961	0.0609096	0.229123	2.27828e-08	5.9986e-06	0.218169	0.482066	0.289173	0.0105925
	JS-Erz-6s	65	core	39.88	8	13.06	0.0911	16.66	22.47	<0.026	0.3241	100.5	0.999995	0.846286	0.0102168	0.143492	1.07576e-07	5.05684e-06	0.29727	0.347201	0.348694	0.00683454
	JS-Erz-6s	66	core	38.28	6.64	3.41	0.0469	29.41	21.77	<0.027	0.4267	99.97	0.999991	0.417353	0.129962	0.45215	0.000526039	9.11495e-06	0.257003	0.638683	0.0949215	0.0093924
	JS-Erz-6s	68	core	38.25	4.07	8.47	0.0837	27.46	21.75	0.0377	0.4743	100.58	0.999995	0.6177	0.176201	0.206095	2.62803e-09	4.63575e-06	0.157585	0.596263	0.235713	0.0104392
	JS-Erz-6s	69	core	39.11	5.31	13.36	0.0809	19.82	22.18	0.047	0.4877	100.39	0.999994	0.794066	0.0498176	0.15611	4.22535e-08	6.29567e-06	0.201793	0.422582	0.365094	0.0105312
	JS-Erz-6s	70	core	39.5	6.47	11.5	0.0742	20.5	22.15	<0.026	0.3219	100.53	0.999996	0.800046	0.02232	0.177103	0.000526039	4.32132e-06	0.245058	0.435232	0.312787	0.00692301
	JS-Erz-6s	71	core	39.81	6.86	11.97	0.0605	19.35	22.48	0.0849	0.5452	101.16	0.999991	0.74237	0.0360845	0.221535	8.46542e-07	9.35074e-06	0.257623	0.40775	0.322991	0.0116357
	JS-Erz-6s	73	core	39.4	7.31	10.44	0.1127	20.72	22.16	0.0618	0.446	100.65	0.999994	0.720086	0.0295383	0.250369	4.16733e-07	6.28426e-06	0.273732	0.435589	0.28118	0.00949954
	JS-Erz-6s	74	core	40.3	11.88	5.35	0.0278	19.68	22.64	<0.026	0.3533	100.25	0.999988	0.583245	0.0136448	0.403097	1.36337e-06	1.24515e-05	0.440583	0.409399	0.142581	0.00743755
	JS-Erz-6s	75	core	39.33	6.86	10.22	0.0699	21.58	22.21	<0.026	0.4525	100.72	0.999995	0.720264	0.0379376	0.241267	0.000526039	5.20438e-06	0.258405	0.455608	0.276317	0.00966945
	JS-Erz-6s	76	core	38.71	5.16	7.67	0.1149	26.79	21.76	<0.027	0.5304	100.74	0.999991	0.56117	0.122292	0.316002	0.000526039	9.23304e-06	0.198382	0.578005	0.212029	0.0115834
	JS-Erz-6s	77	core	39.01	5.72	10.59	0.0996	22.49	22.03	0.0462	0.5092	100.49	0.999993	0.703018	0.0635514	0.233424	5.48371e-08	6.53691e-06	0.217848	0.480997	0.29013	0.0110256
	JS-Erz-6s	81	core	39.42	7.06	11.92	0.0921	18.92	22.09	<0.026	0.4056	99.94	0.999992	0.774049	0.0216117	0.204332	3.9514e-08	7.61633e-06	0.26662	0.401011	0.32367	0.00869883
	JS-Erz-6s	86	core	38.24	2.89	9.41	0.1054	27.8	21.61	<0.027	0.6044	100.68	0.999986	0.498394	0.340074	0.160992	0.000526039	1.37324e-05	0.112795	0.609428	0.264358	0.0134184
	JS-Erz-6s	89	core	37.59	1.83	5.68	0.0628	33.33	21.1	0.0294	0.9572	100.59	0.99987	0.109475	0.808055	0.0823403	2.5536e-11	0.00012955	0.0728868	0.743212	0.162286	0.0216159
	JS-Erz-6s	96	core	39.23	5.92	12.17	0.0815	20.58	22.27	<0.026	0.426	100.7	0.999996	0.793244	0.0394442	0.166781	0.000526039	4.03547e-06	0.223719	0.43646	0.330672	0.00914837
	JS-Erz-6s	97	core	39.45	7.03	11.32	0.1028	19.8	22.43	0.0281	0.4332	100.59	0.999996	0.7816	0.029676	0.188719	8.76141e-08	4.12461e-06	0.265072	0.41871	0.306943	0.00927501
	JS-Erz-6s	98	core	39.17	7.76	4.31	<0.023	26.64	22.13	<0.027	0.4244	100.45	0.99999	0.477268	0.0692074	0.452989	0.000526039	9.74066e-06	0.297859	0.57407	0.118808	0.00926299
	JS-Erz-6s	99	core	39.49	4.91	15.49	0.1505	18.03	22.14	0.055	0.3987	100.66	0.99999	0.846838	0.0316375	0.121514	2.18984e-08	1.02257e-05	0.186151	0.38333	0.42193	0.008589
	JS-Erz-6s	103	core	39.25	5.98	14.28	0.0599	18.31	22.5	<0.026	0.4178	100.8	0.999997	0.85498	0.0295143	0.114977	0.000526039	2.99234e-06	0.223556	0.383948	0.383617	0.00887941
	JS-Erz-6s	104	core	38.6	6.91	1.3791	0.1926	31.4	22.11	<0.027	0.5077	101.11	0.999943	0.200755	0.24916	0.549503	0.000526039	5.68225e-05	0.267628	0.682761	0.0384221	0.011189
	JS-Erz-6s	107	mantle	39.11	8.6	2.34	<0.024	28.19	22.21	<0.026	0.4526	100.91	0.999977	0.318183	0.0957296	0.585538	0.000526039	2.29997e-05	0.326309	0.60023	0.0636985	0.00976267
	JS-Erz-6s	108	core	39.14	6.12	11.34	0.1081	21.27	22.3	<0.026	0.4562	100.77	0.999996	0.76906	0.0461344	0.184802	2.30497e-08	3.60166e-06	0.23131	0.450988	0.307915	0.00978747
	JS-Erz-6s	109	core	38.88	5.8	7.85	0.1224	25.7	21.78	<0.026	0.5658	100.72	0.999989	0.550331	0.0945559	0.355101	1.2733e-08	1.14907e-05	0.221448	0.550631	0.215637	0.0122842
	JS-Erz-6s	110	core	38.7	8.71	3.3	0.0444	26.71	22.14	<0.026	0.4924	100.11	0.99999	0.404288	0.0853731	0.509803	0.000526039	9.90394e-06	0.330621	0.568787	0.0899739	0.0106182
	JS-Erz-6s	115	core	37.69	1.6303	5.73	0.0721	33.5	21.19	<0.027	0.8618	100.68	0.999878	0.104603	0.831903	0.062845	0.000526039	0.000122386	0.0651317	0.750835	0.164465	0.019568
	JS-Erz-6s	118	core	38.85	5.67	7.83	0.0984	25.87	21.82	<0.026	0.5486	100.7	0.99999	0.563922	0.0993096	0.336233	0.000526039	9.79723e-06	0.216965	0.555629	0.215469	0.0119372
	JS-Erz-6s	124	core	39.84	7.05	13.28	0.0747	17.76	22.44	0.1046	0.373	100.92	0.999994	0.829114	0.0168786	0.154	7.9074e-07	5.94461e-06	0.263303	0.372221	0.356566	0.00791073
	JS-Erz-6s	132	core	38.85	4.29	13.01	0.1124	21.25	21.95	0.0366	1.1237	100.63	0.999963	0.561075	0.200685	0.238203	3.0982e-08	3.73156e-05	0.163714	0.455074	0.356846	0.0243659
	JS-Erz-6s	136	core	38.42	2.34	11.56	0.0397	25.59	21.57	0.0315	1.0132	100.57	0.999932	0.354883	0.515038	0.130011	2.06643e-10	6.79174e-05	0.0915573	0.561228	0.324719	0.022496
	JS-Erz-6s	140	core	39.62	6.37	12.08	0.089	20.06	22.15	0.0295	0.3986	100.8	0.999992	0.772185	0.0272407	0.200567	3.0128e-08	7.60515e-06	0.239912	0.424178	0.32738	0.00853021
	JS-Erz-6s	146	core	38.59	6.59	2.85	<0.024	30.45	21.78	<0.027	0.4895	100.77	0.999977	0.317688	0.153855	0.527908	0.000526039	2.2975e-05	0.253429	0.657156	0.0787192	0.0106952
	JS-Erz-6s	147	core	38.57	7.79	3.04	0.0332	28.02	21.92	<0.027	0.5524	99.94	0.999981	0.33469	0.118553	0.546212	0.000526039	1.92549e-05	0.299604	0.604363	0.0839624	0.0120706
	JS-Erz-6s	152	core	38.95	7.11	2.44	0.0481	29.69	22.14	<0.026	0.3861	100.78	0.999984	0.36514	0.129865	0.504453	0.000526039	1.64655e-05	0.276235	0.647024	0.0682144	0.0085268
	JS-Erz-6s	153	core	38.67	6.86	3.67	0.0486	28.72	22.08	0.0473	0.3543	100.44	0.999995	0.503418	0.101523	0.395053	1.0033e-07	5.18268e-06	0.26576	0.62436	0.102073	0.0078066
	JS-Erz-6s	156	core	35.78	4.22	11.71	0.0629	25.09	20.31	<0.027	0.7047	97.9	0.999996	0.598396	0.165574	0.236026	4.90706e-09	4.14174e-06	0.155635	0.519088	0.310507	0.0147701
	JS-Erz-6s	157	core	39.44	6.73	9.45	0.0529	22.11	22.36	<0.027	0.4556	100.62	0.999995	0.711641	0.0456119	0.242216	0.000526039	5.02517e-06	0.25707	0.47362	0.259424	0.00988601
	JS-Erz-6s	158	core	38.35	7.06	1.164	<0.023	31.29	21.86	<0.027	0.6483	100.37	0.999847	0.134273	0.270402	0.594646	0.000526039	0.000153406	0.273471	0.679846	0.0324101	0.0142731
	JS-Erz-6s	159	core	38.75	5.96	5.13	0.0604	28.43	21.96	<0.027	0.4507	100.74	0.999993	0.50884	0.121747	0.36888	0.000526039	7.09315e-06	0.230521	0.616843	0.142735	0.00990099
	JS-Erz-6s	163	core	39.13	6.13	11.63	0.1054	21.01	22.2	0.053	0.365	100.63	0.999997	0.804265	0.0324211	0.163311	6.7011e-08	2.88931e-06	0.231412	0.445075	0.315683	0.00782987
	JS-Erz-6s	164	core	38.39	6.44	3.78	0.0286	29.37	21.78	<0.026	0.3979	100.21	0.999992	0.455396	0.118617	0.425979	1.66325e-08	7.64094e-06	0.249019	0.637102	0.10513	0.00874975
	JS-Erz-6s	165	core	38.93	6.9	1.95	<0.024	30.35	22.22	<0.027	0.4148	100.77	0.999975	0.306986	0.176583	0.515879	0.000526039	2.5378e-05	0.269857	0.666236	0.0546847	0.00922168
	JS-Erz-6s	166	core	39.48	7.41	9.97	0.0753	20.73	22.44	0.042	0.421	100.58	0.999996	0.751124	0.0307667	0.218105	2.29203e-07	3.89468e-06	0.280216	0.439718	0.27102	0.00904516
	JS-Erz-6s	168	core	39.37	6.64	11.73	0.0748	20.08	22.23	0.0267	0.4742	100.63	0.999994	0.755545	0.0345201	0.209929	5.73054e-08	6.26515e-06	0.249664	0.423401	0.316805	0.0101291
	JS-Erz-6s	170	core	39.03	6.01	8.55	0.0709	24.19	21.98	0.0328	0.5922	100.45	0.99999	0.591622	0.0859544	0.322414	4.86032e-08	1.03508e-05	0.230556	0.520799	0.235739	0.0129071
	JS-Erz-6s	172	core	39.53	7.19	12.3	0.1081	18.71	22.49	0.0766	0.3494	100.76	0.999997	0.8364	0.0185696	0.145027	4.68977e-07	2.84839e-06	0.268963	0.392805	0.330801	0.00743056
	JS-Erz-6s	175	core	39.12	4.97	13.74	0.1648	19.94	21.88	<0.026	0.3685	100.2	0.999993	0.818797	0.0353163	0.145879	3.86234e-09	7.30913e-06	0.189314	0.426414	0.376297	0.00797549
	JS-Erz-6s	186	core	39.55	6.47	14.34	0.0948	16.95	22.37	0.0627	0.3799	100.21	0.999994	0.855353	0.0183005	0.12634	2.2085e-07	5.99197e-06	0.244078	0.358849	0.38892	0.00815263
	JS-Erz-6s	192	core	39.07	5.82	10.15	0.078	22.92	22.16	<0.027	0.5452	100.74	0.999994	0.6848	0.0731703	0.241498	0.000526039	6.00458e-06	0.221489	0.489275	0.277445	0.0117906
	JS-Erz-6s	205	core	38.55	5.72	7.72	<0.024	25.72	21.99	<0.026	0.5832	100.29	0.999995	0.585441	0.120661	0.293367	0.000526039	5.4031e-06	0.219632	0.554484	0.213148	0.0127357
	JS-Erz-6s	213	core	38.81	5.99	8.06	0.0559	24.93	21.95	<0.027	0.5614	100.38	0.999993	0.593035	0.0919635	0.314994	1.85437e-08	7.44313e-06	0.229627	0.536018	0.222133	0.0122223
	JS-Erz-6s	221	core	39.54	6.4	12.78	0.0791	19.02	22.27	0.0361	0.4385	100.57	0.999993	0.7923	0.0284987	0.179194	7.05897e-08	7.1787e-06	0.241438	0.402674	0.346483	0.00940408
	JS-Erz-6s	222	core	39.5	5.51	15.59	0.115	17.16	22.34	0.0482	0.3539	100.62	0.999994	0.877941	0.0212694	0.100784	3.70939e-08	5.56514e-06	0.207687	0.362536	0.422209	0.00756742
	JS-Erz-6s	223	core	39.13	5.68	11.06	0.0604	21.89	22.04	0.0362	0.452	100.35	0.999994	0.737397	0.0511345	0.211462	2.5945e-08	6.31994e-06	0.216977	0.469366	0.303835	0.00982161
	JS-Erz-6s	226	core	39.05	6.19	9.34	0.1483	23.35	21.76	<0.027	0.4827	100.33	0.99999	0.635575	0.0524614	0.311427	0.000526039	1.04218e-05	0.235649	0.498515	0.255398	0.0104383
	JS-Erz-6s	231	core	39.86	6.65	13.43	0.0759	17.69	22.2	0.0581	0.3626	100.32	0.99999	0.816185	0.0165304	0.167274	1.47276e-07	1.04535e-05	0.251656	0.375388	0.365161	0.00779613
	JS-Erz-6s	232	core	38.95	7.68	3.44	0.0391	28.25	22.15	<0.027	0.2982	100.81	0.999995	0.516415	0.0673814	0.415672	0.000526039	4.84277e-06	0.293559	0.605454	0.0945189	0.00646796
	JS-Erz-6s	233	core	39.17	6.72	9.23	0.096	22.67	22.15	0.0617	0.4651	100.56	0.999995	0.687365	0.0479623	0.264667	2.36845e-07	5.22034e-06	0.255116	0.48307	0.251783	0.0100313
	JS-Erz-6s	235	core	38.88	7.7	3.09	0.0562	28.29	22.14	0.0267	0.3328	100.51	0.999993	0.46771	0.0815725	0.450711	7.13461e-08	7.02006e-06	0.296326	0.610921	0.0854787	0.00727407
	JS-Erz-6s	236	core	38.75	6.04	5.21	0.0414	27.94	21.91	<0.027	0.4023	100.29	0.999993	0.540176	0.100954	0.358338	0.000526039	6.52996e-06	0.234991	0.610271	0.145839	0.00889838
	JS-Erz-6s	238	core	38.91	6.59	7.29	0.0558	25.14	22.15	<0.027	0.5522	100.69	0.999994	0.586009	0.0870847	0.326374	0.000526039	5.55571e-06	0.251127	0.537178	0.199737	0.0119576
	JS-Erz-6s	241	core	39.53	6.76	13.33	0.0743	17.72	22.37	0.0709	0.4023	100.26	0.999994	0.830113	0.0207511	0.14913	3.84375e-07	5.6848e-06	0.255019	0.374852	0.3615	0.0086286
	JS-Erz-6s	242	core	39.31	5.71	13.91	0.0732	18.88	22.25	0.0354	0.3516	100.53	0.999996	0.85175	0.0253433	0.122902	2.15764e-08	3.92753e-06	0.215581	0.399581	0.377308	0.00752954
	JS-Erz-6s	243	core	39.19	7.66	5.86	0.0649	25.61	22.09	0.0338	0.4932	101	0.999992	0.516393	0.061852	0.421746	1.82097e-07	8.48206e-06	0.289013	0.541754	0.158667	0.0105668
	JS-Erz-6s	246	core	39	6.03	10.34	0.1166	22.23	22.13	<0.026	0.4775	100.33	0.999995	0.72356	0.0557348	0.220174	0.000526039	4.72801e-06	0.23015	0.475976	0.283518	0.0103567
	JS-Erz-6s	249	core	38.62	6.93	2.95	0.0456	29.58	22.01	<0.026	0.3942	100.55	0.99999	0.409439	0.126805	0.46322	0.000526039	9.69855e-06	0.267947	0.641433	0.0819562	0.00866395
	JS-Erz-6s	250	core	38.62	3.34	10.24	0.0959	26.5	21.65	<0.027	0.423	100.88	0.999991	0.66316	0.16504	0.171265	0.000526039	8.56873e-06	0.129532	0.57605	0.285104	0.00931428
	JS-Erz-6s	253	core	39.64	6.83	11.84	0.0805	19.63	22.25	<0.027	0.4291	100.7	0.999993	0.764236	0.0265469	0.208684	0.000526039	7.40216e-06	0.256777	0.414039	0.320015	0.00916943
	JS-Erz-6s	254	core	39.86	6.82	13.35	0.0791	17.9	22.54	0.0515	0.375	100.98	0.999995	0.838145	0.0188017	0.143048	1.75605e-07	5.13e-06	0.255857	0.376349	0.359805	0.00798823
	JS-Erz-6s	260	core	39.02	6.5	7.17	0.0969	25.47	21.68	<0.027	0.5281	100.47	0.999984	0.514461	0.0677272	0.417271	0.000526039	1.55252e-05	0.247845	0.54443	0.196286	0.011439
	JS-Erz-6s	265	core	39.14	5.33	12.66	0.1109	20.67	21.92	0.056	0.4211	100.3	0.999992	0.777033	0.0416834	0.181275	3.36563e-08	7.81763e-06	0.202774	0.441673	0.346446	0.0091065
	JS-Erz-6s	267	core	39.66	5.91	12.94	0.1135	19.7	22.14	0.0673	0.3782	100.92	0.999992	0.798006	0.0268123	0.175173	7.52169e-08	8.00512e-06	0.223091	0.41746	0.351334	0.00811542
	JS-Erz-6s	272	core	38.97	7.19	6.41	0.0669	25.33	22.01	0.0378	0.4064	100.43	0.999995	0.598535	0.0545375	0.346922	1.0188e-07	5.05772e-06	0.273986	0.541489	0.17573	0.00879483
	JS-Erz-6s	273	core	39.23	5.81	12.71	0.0815	20.15	22.2	0.0426	0.4808	100.7	0.999994	0.778343	0.0433202	0.17833	5.76622e-08	6.00289e-06	0.21914	0.426171	0.344387	0.0103018
	JS-Erz-6s	275	core	38.96	6.19	11.3	0.1098	21.37	22.04	<0.027	0.4111	100.38	0.999996	0.767755	0.0377686	0.193946	0.000526039	3.81277e-06	0.233153	0.45195	0.306085	0.0088113
	JS-Erz-6s	276	core	39.06	7.95	6.08	<0.024	24.47	22.34	<0.027	0.541	100.44	0.999995	0.559028	0.0685591	0.371881	0.000526039	5.41604e-06	0.301543	0.521043	0.165749	0.0116656
	JS-Erz-6s	277	core	39.66	7.45	11.39	0.0973	19.15	22.51	<0.026	0.3892	100.66	0.999996	0.798899	0.0217356	0.178836	0.000526039	3.94625e-06	0.279949	0.403889	0.307844	0.0083183
	JS-Erz-8s	1	core	38.56	7.33	2.64	0.0581	29.75	21.87	<0.027	0.3545	100.56	0.999989	0.38983	0.104264	0.505369	0.000526039	1.11304e-05	0.280741	0.638996	0.0725454	0.0077183
	JS-Erz-8s	2	core	38.32	6.16	4.22	0.068	29.35	21.76	<0.027	0.384	100.26	0.999994	0.494761	0.117394	0.387313	0.000526039	5.71093e-06	0.238174	0.636294	0.117094	0.00843742
	JS-Erz-8s	5	mantle	39.69	8.91	9.64	0.0648	19.24	22.65	0.0571	0.3723	100.62	0.999997	0.777026	0.0177299	0.20524	1.39059e-06	2.92896e-06	0.332037	0.402001	0.258085	0.00787716
	JS-Erz-8s	7	core	38.87	7.11	6.96	0.0938	24.69	22	<0.026	0.3297	100.07	0.999997	0.677085	0.0410007	0.281385	0.000526039	2.93834e-06	0.27194	0.529725	0.191174	0.0071607
	JS-Erz-8s	9	core	37.33	1.5757	7.38	0.0426	32.13	21.16	<0.027	0.8158	100.45	0.999949	0.141649	0.804342	0.0534321	0.000526039	5.12024e-05	0.0621066	0.71045	0.20917	0.0182734
	JS-Erz-8s	10	core	37.97	4.61	2.29	0.0355	33.98	21.56	<0.027	0.4276	100.89	0.999975	0.273952	0.34041	0.385088	0.000526039	2.45722e-05	0.180287	0.745784	0.0644238	0.00950542
	JS-Erz-8s	11	core	38.11	5.55	2.61	0.0375	31.86	21.77	<0.027	0.4458	100.38	0.999986	0.332547	0.246429	0.420484	0.000526039	1.43847e-05	0.217213	0.699463	0.0734077	0.00991589
	JS-Erz-8s	14	core	39.01	5.78	9.1	0.1242	24.6	21.93	<0.027	0.5336	101.09	0.999992	0.622999	0.0791776	0.29729	0.000526039	7.91557e-06	0.218642	0.522294	0.247585	0.0114779
	JS-Erz-8s	20	core	38.54	6.66	4.72	0.0815	27.98	21.89	<0.027	0.4431	100.31	0.999994	0.497351	0.102128	0.399989	0.000526039	6.31755e-06	0.256184	0.603804	0.130336	0.00967549
	JS-Erz-8s	21	core	38.17	5.72	3.57	0.0411	30.8	21.68	<0.027	0.4558	100.44	0.99999	0.396629	0.18265	0.420184	0.000526039	1.0244e-05	0.221577	0.669044	0.0993449	0.010034
	JS-Erz-8s	22	core	39.15	4.69	14.56	0.0999	19.77	22.09	<0.026	0.4268	100.82	0.999993	0.822817	0.0473217	0.129855	2.73679e-09	6.60292e-06	0.177095	0.418634	0.39511	0.00916124
	JS-Erz-8s	25	core	38.72	6.31	4.07	0.0592	29.17	21.87	<0.027	0.4215	100.62	0.99999	0.451025	0.117933	0.430506	0.000526039	9.93831e-06	0.244294	0.633157	0.113279	0.00926979
	JS-Erz-8s	28	core	39.03	5.86	12.42	0.0957	20.49	22.24	<0.026	0.4058	100.56	0.999997	0.811517	0.0378714	0.150083	0.000526039	2.98563e-06	0.220952	0.433623	0.336729	0.00869565
	JS-Erz-8s	31	core	39.57	6.58	13.08	0.113	18.98	22.18	0.0426	0.3575	100.9	0.999994	0.815112	0.019555	0.165327	6.92651e-08	5.58759e-06	0.245135	0.396941	0.350358	0.0075655
	JS-Erz-8s	32	core	39.23	8.49	2.51	<0.023	28.12	22.41	<0.026	0.4392	101.23	0.999985	0.360152	0.100474	0.538833	0.000526039	1.50296e-05	0.322543	0.599462	0.0685195	0.00947574
	JS-Erz-8s	35	core	38.71	6.06	7.9	0.0787	25.51	21.7	<0.027	0.5434	100.52	0.999991	0.561425	0.0823129	0.355726	0.000526039	9.36469e-06	0.229913	0.542938	0.215431	0.0117178
	JS-Erz-8s	37	core	39.44	5.78	14.2	0.113	18.56	22.11	0.0468	0.3752	100.63	0.999993	0.831485	0.0240732	0.144435	4.05611e-08	7.02561e-06	0.2172	0.391292	0.383499	0.00800822
	JS-Erz-8s	38	core	38.21	4.44	6.22	0.0434	29.23	21.75	<0.026	0.5657	100.48	0.999992	0.480322	0.238536	0.280608	0.000526039	7.8393e-06	0.173177	0.639769	0.174513	0.0125415
	JS-Erz-8s	40	core	38.5	6.62	4.62	0.0814	28.29	21.71	<0.026	0.4619	100.28	0.999991	0.456086	0.101202	0.442176	0.000526039	9.41876e-06	0.253732	0.608759	0.127445	0.0100632
	JS-Erz-8s	42	core	39	7.59	4.41	0.0743	26.91	21.94	<0.027	0.3917	100.32	0.999991	0.485176	0.0631514	0.451137	0.000526039	9.29212e-06	0.291029	0.578885	0.121554	0.00853217
	JS-Erz-8s	45	core	39.12	5.46	13.84	0.1393	19.4	21.99	<0.027	0.3943	100.35	0.999994	0.819153	0.0317501	0.148565	0.000526039	6.14766e-06	0.205816	0.410474	0.375262	0.00844754
	JS-Erz-8s	48	core	38.28	6.25	4.31	0.0384	29.24	21.98	<0.027	0.462	100.58	0.999995	0.481945	0.149262	0.368262	0.000526039	4.53773e-06	0.240223	0.630647	0.119034	0.0100963
	JS-Erz-8s	51	mantle	38.86	6.46	4.39	0.0508	29.05	22.02	0.0309	0.388	101.25	0.999994	0.501272	0.102644	0.396078	2.77777e-08	6.17969e-06	0.247181	0.623782	0.120592	0.00844479
	JS-Erz-8s	53	core	38.67	4.99	11.17	0.0906	23.31	22.1	0.0376	0.5362	100.9	0.999996	0.71872	0.0957207	0.185555	1.80673e-08	3.82987e-06	0.189206	0.495303	0.303951	0.0115406
	JS-Erz-8s	65	core	38.68	6.33	4.5	0.053	29.1	22.06	<0.027	0.3793	101.11	0.999996	0.530666	0.109906	0.358898	0.000526039	4.17601e-06	0.242405	0.625395	0.123948	0.00825209
	JS-Erz-8s	66	core	39.19	6.55	10.48	0.1043	21.67	22.12	<0.026	0.4957	100.63	0.999994	0.707213	0.0452712	0.24751	3.47748e-08	6.18727e-06	0.246848	0.458409	0.284124	0.0106194
	JS-Erz-8s	67	mantle	37.98	3.32	5.09	0.0735	32.37	21.56	<0.027	0.7785	101.19	0.999973	0.257142	0.517511	0.22532	8.35707e-10	2.6543e-05	0.129684	0.710017	0.143002	0.0172968
	JS-Erz-8s	68	core	39.31	5.73	13.48	0.1037	19.46	22.13	<0.026	0.4011	100.63	0.999994	0.814341	0.0308253	0.154828	1.06786e-08	5.86111e-06	0.215619	0.411018	0.364778	0.00858497
	JS-Erz-8s	70	core	38.8	5.2	9.42	0.0738	24.56	21.86	<0.027	0.5542	100.47	0.999992	0.629901	0.100252	0.269312	0.000526039	8.46103e-06	0.199547	0.528576	0.259794	0.0120827
	JS-Erz-8s	74	core	39.16	7.3	9.67	0.0981	21.39	22.24	0.1033	0.4678	100.43	0.999996	0.71444	0.0379787	0.247575	1.333e-06	4.37443e-06	0.275455	0.452509	0.262014	0.0100226
	JS-Erz-8s	75	core	38.82	6.87	4.29	0.0402	28.3	21.98	<0.027	0.5078	100.83	0.999989	0.42815	0.113335	0.457978	0.000526039	1.09794e-05	0.263009	0.607917	0.118021	0.011053
	JS-Erz-8s	83	core	39.08	8.35	2.73	0.0367	27.88	22.11	<0.027	0.4135	100.61	0.999982	0.364185	0.0817595	0.553511	0.000526039	1.77503e-05	0.318883	0.597217	0.0749232	0.00897744
	JS-Erz-8s	85	core	38.9	6.54	4.9	0.0666	27.97	21.99	<0.027	0.3845	100.76	0.999994	0.532633	0.0861217	0.380714	0.000526039	6.14666e-06	0.251745	0.604255	0.135581	0.0084194
	JS-Erz-8s	86	core	38.15	5.3	3.79	0.0376	31.25	21.69	<0.027	0.4274	100.67	0.999992	0.424466	0.197229	0.378297	5.30502e-09	8.17265e-06	0.205453	0.679589	0.105548	0.0094097
	JS-Erz-8s	87	core	38.88	7.34	3.63	0.0481	28.28	21.97	<0.027	0.4057	100.55	0.999989	0.434757	0.0881158	0.476591	0.000526039	1.06146e-05	0.281829	0.609044	0.100284	0.00884365
	JS-Erz-8s	89	core	38.74	4.57	10.29	0.1408	24.77	21.73	0.0397	0.5931	100.87	0.999988	0.619664	0.124426	0.255899	9.35859e-09	1.15807e-05	0.174404	0.5305	0.282227	0.0128691
	JS-Erz-8s	91	core	38.35	3.71	9.35	0.0737	27.19	21.71	<0.028	0.5767	100.96	0.999992	0.571924	0.221982	0.205559	0.000526039	8.18509e-06	0.14276	0.58626	0.258391	0.0125887
	JS-Erz-8s	114	core	38.63	6.44	4.16	0.0422	29.35	22.15	<0.027	0.3805	101.15	0.999996	0.522644	0.120143	0.356683	0.000526039	3.66211e-06	0.246515	0.630593	0.114608	0.00828371
	JS-Erz-8s	116	core	37.72	4.28	2.87	0.0692	33.59	21.54	<0.028	0.4802	100.55	0.999984	0.293093	0.384677	0.321688	0.000526039	1.59905e-05	0.16818	0.739927	0.0811791	0.010713
	JS-Erz-8s	117	core	38.28	6.42	3.41	0.0356	30.13	21.84	<0.027	0.3949	100.52	0.999993	0.440405	0.137818	0.421245	0.000526039	6.52221e-06	0.246975	0.650047	0.0943537	0.00862426
	JS-Erz-8s	123	core	38.55	6.86	4.17	0.0477	28.56	21.97	<0.026	0.3874	100.58	0.999995	0.505229	0.0979548	0.396811	3.78565e-08	4.89788e-06	0.262747	0.614128	0.114693	0.00843182
	JS-Erz-8s	133	core	38.67	6.64	4.75	0.0411	27.98	21.94	<0.027	0.4015	100.42	0.999994	0.522228	0.0922817	0.384959	0.000526039	5.6363e-06	0.255513	0.604364	0.13134	0.00878377
	JS-Erz-8s	138	mantle	38.65	5.84	9.14	0.1151	23.72	21.52	<0.026	0.58	99.57	0.999985	0.581265	0.0732351	0.344959	0.000526039	1.5279e-05	0.22414	0.510901	0.252303	0.0126566
	JS-Erz-8s	141	core	38.63	6.91	3.71	0.0476	29.13	22	<0.027	0.3839	100.82	0.999994	0.472009	0.105025	0.422434	0.000526039	5.97928e-06	0.264507	0.625093	0.102053	0.00834675
	JS-Erz-8s	142	core	38.41	6.2	3.92	0.0537	29.62	21.96	<0.027	0.4618	100.63	0.999993	0.445362	0.156327	0.397778	0.000526039	6.75072e-06	0.239388	0.641701	0.108783	0.0101286
	JS-Erz-8s	143	core	38.98	8.66	3.19	<0.024	27.17	22.24	<0.027	0.4302	100.69	0.999991	0.418874	0.0775064	0.503085	0.000526039	9.32055e-06	0.327546	0.57656	0.0866497	0.00924484
	JS-Erz-8s	144	core	38.52	6.4	4.33	0.0532	28.95	21.91	<0.027	0.3966	100.58	0.999995	0.501651	0.111142	0.386676	0.000526039	5.44371e-06	0.246337	0.625239	0.119758	0.00866586
	JS-Erz-8s	145	core	38.52	6.53	4.18	0.0691	28.95	22.01	<0.027	0.4222	100.68	0.999995	0.489325	0.121873	0.388271	0.000526039	5.20088e-06	0.250898	0.624418	0.115467	0.00921736
	JS-Erz-8s	152	core	38.19	2.5	10.6	0.0624	27.38	21.56	<0.026	0.5048	100.8	0.999989	0.553725	0.324202	0.121536	0.000526039	1.11074e-05	0.0969279	0.596173	0.295763	0.0111367
	JS-Erz-8s	153	core	39.12	7.96	3.19	0.0423	27.89	22.02	<0.027	0.3797	100.62	0.999985	0.406935	0.071766	0.521284	6.0228e-08	1.45566e-05	0.304727	0.599091	0.0879246	0.00825756
	JS-Erz-8s	158	core	38.34	5.57	4.94	<0.024	29.33	21.93	<0.027	0.4428	100.57	0.999995	0.516178	0.157235	0.326583	8.35517e-09	4.51509e-06	0.215649	0.637114	0.137489	0.00974919
	JS-Erz-8s	159	core	39.16	6.02	12.22	0.0868	20.08	22.15	<0.026	0.4243	100.16	0.999995	0.790483	0.0356142	0.173372	0.000526039	5.01847e-06	0.228795	0.428095	0.333944	0.00916514
	JS-Erz-8s	166	core	38.4	6.36	3.97	0.0491	29.15	21.8	<0.027	0.4215	100.17	0.999992	0.456799	0.124055	0.418612	0.000526039	7.79975e-06	0.246261	0.63391	0.110542	0.00928689
	JS-Erz-8s	169	core	38.83	6.95	4.12	0.0369	28.52	22.13	<0.027	0.413	101	0.999994	0.488189	0.102657	0.408622	0.000526039	5.85499e-06	0.265871	0.611871	0.113279	0.00897899
	JS-Erz-8s	173	core	39.69	6.68	13.16	0.0942	18.49	22.44	0.0528	0.4119	101.03	0.999995	0.817706	0.0233458	0.158943	1.8275e-07	5.46266e-06	0.249809	0.387686	0.353757	0.0087483
	JS-Erz-8s	174	core	39.49	5.08	15.04	0.1584	18.46	22.05	0.0303	0.4127	100.72	0.999988	0.826095	0.0319643	0.141929	8.72631e-09	1.16642e-05	0.191936	0.391031	0.408177	0.00885604
	JS-Erz-8s	176	core	38.45	5.84	5.65	0.0564	28.14	21.89	<0.026	0.3752	100.42	0.999997	0.59282	0.101442	0.305208	0.000526039	3.39856e-06	0.225335	0.609553	0.156885	0.0082273
	JS-Erz-8s	178	core	39.18	8.13	4.17	0.0641	26.53	22.1	<0.027	0.4049	100.6	0.99999	0.471367	0.0598332	0.468264	0.000526039	9.69171e-06	0.309887	0.567042	0.11431	0.00876095
	JS-Erz-8s	180	core	39.51	6.73	12.12	0.0756	19.33	22.26	<0.026	0.3863	100.43	0.999995	0.797816	0.0236827	0.17797	0.000526039	5.3062e-06	0.253846	0.409187	0.328683	0.00828375
	JS-Erz-8s	182	core	38.67	7.87	3.06	0.0266	28.36	22.08	<0.027	0.3375	100.4	0.999994	0.465542	0.0817466	0.452179	0.000526039	5.92995e-06	0.300858	0.607856	0.0839681	0.00731817
	JS-Erz-8s	183	core	39.26	5.51	13.34	0.0624	19.68	22.29	0.0312	0.3811	100.55	0.999996	0.835382	0.0340063	0.130608	1.51172e-08	3.80369e-06	0.209008	0.419018	0.363761	0.00821342
	JS-Erz-8s	184	core	38.06	4.52	4.18	0.0458	31.64	21.65	<0.027	0.6061	100.73	0.999985	0.338664	0.322906	0.338414	4.10832e-09	1.51167e-05	0.176421	0.692855	0.117281	0.013444
	JS-Erz-8s	189	core	39.04	7.74	3.58	0.0409	27.94	22.05	<0.027	0.3436	100.77	0.999992	0.470484	0.0673794	0.461602	0.000526039	8.16099e-06	0.295681	0.59853	0.0983383	0.00745037
	JS-Erz-8s	190	core	38.82	5.14	8.35	0.0724	26.03	21.68	<0.026	0.6357	100.73	0.999983	0.526235	0.126006	0.347216	0.000526039	1.65793e-05	0.196934	0.559445	0.229784	0.0138368
	JS-Erz-8s	192	core	38	3.77	8.74	0.0329	27.48	21.86	<0.027	0.5789	100.47	0.999996	0.56882	0.256628	0.174022	0.000526039	4.06137e-06	0.146063	0.597696	0.243494	0.0127473
	JS-Erz-8s	195	core	38.48	6.05	5.1	0.0658	28.2	22.04	<0.027	0.4158	100.35	0.999996	0.557298	0.120815	0.321357	0.000526039	3.706e-06	0.234813	0.613831	0.142194	0.0091614
	JS-Erz-8s	198	core	39.03	6.36	3.48	0.0497	30.13	21.93	<0.027	0.4375	101.43	0.999983	0.38348	0.128483	0.487493	0.000526039	1.7444e-05	0.244433	0.649813	0.0962005	0.00955313
	JS-Erz-8s	199	core	39.37	6.46	9.95	0.114	22.26	22.18	0.0473	0.4297	100.81	0.999995	0.717616	0.0420663	0.240313	8.75226e-08	5.48668e-06	0.245133	0.474058	0.271535	0.00927396
	JS-Erz-8s	202	core	38.4	6.25	3.31	0.0369	30.16	22.04	<0.027	0.4018	100.63	0.999994	0.446385	0.161311	0.392298	2.08181e-08	5.95108e-06	0.242226	0.656418	0.0925074	0.00884926
	JS-Erz-8s	203	core	38.84	5.37	9.44	0.0712	24.88	21.9	<0.026	0.5684	101.08	0.999992	0.62205	0.0986527	0.278764	0.000526039	7.54202e-06	0.203129	0.527939	0.256715	0.0122174
	JS-Erz-8s	204	core	39.03	5.87	8.79	0.1497	24.74	21.84	0.1267	0.5451	101.08	0.99999	0.594382	0.0776627	0.327945	3.61577e-07	1.04109e-05	0.222447	0.526281	0.23952	0.0117522
	JS-Erz-8s	206	core	37.95	4.33	5.6	<0.024	30.42	21.83	<0.027	0.5249	100.66	0.999995	0.472745	0.279977	0.246747	0.000526039	4.5285e-06	0.168334	0.663698	0.156369	0.0115989
	JS-Erz-8s	221	core	38.57	7	3.16	0.0412	29.53	22.03	<0.027	0.425	100.77	0.999992	0.412396	0.12995	0.457645	4.78497e-08	8.36241e-06	0.26842	0.635398	0.0869247	0.00925757
	JS-Erz-8s	222	core	37.94	4.35	3.5	0.0367	32.6	21.74	<0.027	0.5898	100.75	0.999986	0.299401	0.395312	0.304746	0.000526039	1.44774e-05	0.170435	0.717663	0.0987518	0.0131502
	JS-Erz-8s	224	core	39.29	6.3	11.93	0.0999	20.44	22.32	<0.026	0.3908	100.8	0.999997	0.804125	0.0318398	0.163506	0.000526039	3.23847e-06	0.237285	0.431563	0.3228	0.00835229
	JS-Erz-8s	226	core	38.84	7.69	3.2	0.0345	28.45	22.31	<0.027	0.4313	100.98	0.999993	0.436219	0.112427	0.450821	0.000526039	6.77825e-06	0.293495	0.609157	0.0879985	0.00934984
	JS-Erz-8s	227	core	38.43	6.01	3.63	0.0423	30.36	22.09	<0.027	0.4908	101.05	0.999993	0.41627	0.19799	0.385207	0.000526039	6.75001e-06	0.231725	0.656998	0.100525	0.0107527
	JS-Erz-8s	230	core	38.96	5.71	8.62	0.119	24.68	21.82	<0.026	0.5291	100.44	0.99999	0.601466	0.0812448	0.316753	0.000526039	1.04831e-05	0.219118	0.531524	0.237809	0.0115483
	JS-Erz-8s	232	core	38.77	5.44	7.82	0.1294	26.15	21.91	<0.027	0.568	100.78	0.999992	0.568875	0.119788	0.310803	0.000526039	8.06072e-06	0.208656	0.563139	0.215823	0.0123827
	JS-Erz-8s	233	core	39.74	7.35	11.49	0.1133	18.93	22.39	0.0307	0.3334	100.39	0.999996	0.811218	0.0169502	0.171827	7.69969e-08	4.47882e-06	0.278249	0.401933	0.312652	0.00716599
	JS-Erz-8s	234	core	39.84	10.69	6.78	0.0305	20.19	22.64	0.0439	0.3419	100.56	0.999996	0.686213	0.0155827	0.298198	2.36949e-06	3.97891e-06	0.39465	0.418292	0.179882	0.00717545
	JS-Erz-8s	237	core	38.95	6.83	6.87	0.046	25.41	22.4	<0.027	0.4735	100.99	0.999997	0.634747	0.0808375	0.283887	0.000526039	2.73774e-06	0.259773	0.542207	0.18779	0.0102309
	JS-Erz-8s	240	core	39.56	6.11	13.57	0.1047	18.75	22.41	0.0383	0.3707	100.92	0.999996	0.842454	0.0243453	0.133196	4.39415e-08	4.18775e-06	0.229814	0.395467	0.366803	0.00791601
	JS-Erz-8s	242	core	39.22	6.07	9.44	0.101	23.99	21.99	0.0287	0.5306	101.36	0.999991	0.630869	0.0658918	0.30323	2.81663e-08	8.61927e-06	0.228016	0.505729	0.254929	0.0113265
	JS-Erz-8s	246	core	38.87	6.98	4.8	0.1239	27.58	21.94	<0.027	0.3867	100.68	0.999993	0.5197	0.0744371	0.40533	0.000526039	6.52469e-06	0.267055	0.59242	0.132112	0.00841316
	JS-Erz-8s	252	core	38.41	4.4	8.88	0.0645	25.95	21.54	0.0348	1.1679	100.45	0.999954	0.377167	0.278171	0.344616	2.40835e-08	4.58275e-05	0.169245	0.559798	0.245438	0.025519
	JS-Erz-8s	257	core	39.23	5.68	9.97	0.0894	23.56	22.3	<0.027	0.5318	101.35	0.999995	0.686939	0.0799246	0.232605	0.000526039	5.13518e-06	0.215321	0.501526	0.271695	0.0114582
	JS-Erz-8s	271	mantle	39.66	6.93	13.52	0.0648	17.73	22.22	<0.027	0.3579	100.51	0.999993	0.826541	0.0155584	0.157894	3.43866e-08	6.76052e-06	0.258409	0.371308	0.3627	0.00758178
	JS-Erz-8s	272	core	38.79	7.98	2.31	<0.024	29.06	22.1	0.0338	0.295	100.58	0.999991	0.420229	0.0845561	0.495206	1.2384e-07	8.89671e-06	0.305539	0.624406	0.0636401	0.00641399
	JS-Erz-8s	274	core	39.53	6.82	13.34	0.0849	17.98	22.28	0.0375	0.3455	100.41	0.999995	0.839828	0.0165573	0.143609	8.17542e-08	4.71715e-06	0.255547	0.377844	0.359259	0.00735111
	JS-Erz-8s	275	core	38.71	5.13	7.16	0.1175	27.67	21.75	<0.026	0.6613	101.21	0.999986	0.474275	0.163749	0.361436	0.000526039	1.43182e-05	0.195903	0.593174	0.196565	0.0143574
	JS-Erz-8s	277	mantle	38.57	5.71	4.02	0.0402	30.14	21.91	<0.028	0.4403	100.83	0.999991	0.444102	0.164413	0.39095	0.000526039	8.67931e-06	0.221571	0.656506	0.112209	0.00971362
	JS-Erz-8s	278	mantle	39.13	6.23	6	0.1195	27.37	21.73	0.05	0.4108	101.04	0.999988	0.518593	0.0706077	0.410787	4.35149e-08	1.20862e-05	0.238429	0.587568	0.165066	0.00893691
	JS-Erz-8s	280	mantle	38.79	6.61	3.98	0.0572	28.85	22.1	0.0341	0.3965	100.82	0.999994	0.488937	0.112883	0.398174	4.82186e-08	6.22057e-06	0.255498	0.625409	0.110386	0.00870674
	JS-Erz-8s	281	core	38.84	5.89	7.63	0.0978	25.98	21.66	<0.027	0.5363	100.64	0.999988	0.538506	0.0853978	0.375558	0.000526039	1.24457e-05	0.224327	0.555115	0.208953	0.0116048
	JS-Erz-8s	282	core	39.13	5.81	10.9	0.0896	21.96	22.21	0.0312	0.438	100.57	0.999996	0.756847	0.0510176	0.192131	2.35946e-08	4.12725e-06	0.221635	0.470014	0.298857	0.00949388
	JS-Erz-8s	285	core	39.28	5.44	13.96	0.1066	19.25	21.91	0.0886	0.3601	100.4	0.999992	0.821795	0.0264617	0.151735	7.07464e-08	7.78697e-06	0.20535	0.407883	0.379044	0.00772342
	JS-Erz-8s	287	core	39.32	5.4	14.21	0.1209	19.22	22.11	0.0452	0.4026	100.82	0.999993	0.824117	0.032215	0.143661	2.67564e-08	6.56445e-06	0.202916	0.405005	0.383489	0.00859001
	JS-Erz-8s	288	core	38.77	6.43	4.49	0.0681	28.28	21.78	<0.027	0.4054	100.25	0.999989	0.475706	0.0937204	0.430037	0.000526039	1.05438e-05	0.249652	0.616076	0.125329	0.0089425
	JS-Erz-9s	1	core	38.32	3.24	12.33	0.1478	24.23	21.88	<0.026	0.4277	100.59	0.999996	0.739319	0.152214	0.107937	0.000526039	3.83109e-06	0.125116	0.523893	0.341619	0.00937126
	JS-Erz-9s	4	core	39.14	8.29	4.28	0.081	26.48	22.47	<0.027	0.3195	101.06	0.999997	0.593744	0.0543577	0.351369	0.000526039	2.59879e-06	0.313813	0.562763	0.116554	0.00686987
	JS-Erz-9s	8	core	39.08	8.44	3	0.0518	27.34	22.27	<0.026	0.345	100.54	0.999992	0.456644	0.0694928	0.473329	0.000526039	7.95781e-06	0.323018	0.586925	0.0825547	0.00750193
	JS-Erz-9s	9	core	38.63	6.63	4.62	0.0517	28.8	21.95	<0.027	0.3954	101.1	0.999995	0.515194	0.0971271	0.387148	0.000526039	4.73661e-06	0.251868	0.613423	0.126181	0.00852755
	JS-Erz-9s	10	core	39.37	9.54	4.6	0.043	24.07	22.44	0.0345	0.453	100.55	0.999993	0.513615	0.0457538	0.440623	1.08006e-06	7.14539e-06	0.358579	0.507461	0.12429	0.00967067
	JS-Erz-9s	11	mantle	38.36	4.16	10.16	0.1067	25.42	21.8	<0.026	0.4546	100.46	0.999996	0.694103	0.127701	0.177666	0.000526039	4.05984e-06	0.160009	0.54884	0.281218	0.00993218
	JS-Erz-9s	12	core	39.1	9.64	3.82	0.0509	25.16	22.35	0.0277	0.3683	100.51	0.999995	0.514441	0.0448926	0.440661	5.30252e-07	5.05475e-06	0.360861	0.528669	0.102632	0.00783764
	JS-Erz-9s	13	core	39.01	8.32	4.47	0.0474	26.14	22.32	0.0267	0.4058	100.74	0.999996	0.536389	0.0632114	0.400395	1.88572e-07	4.33273e-06	0.314928	0.554818	0.121522	0.00873232
	JS-Erz-9s	15	core	38.57	3.65	10.96	0.1068	25.3	21.78	<0.027	0.4567	100.82	0.999994	0.691298	0.14473	0.163439	0.000526039	6.28547e-06	0.14036	0.546474	0.303171	0.00999484
	JS-Erz-9s	16	core	38.64	8.3	4.15	0.0256	26.51	22.17	0.04	0.3363	100.16	0.999997	0.567036	0.0577098	0.375251	2.93432e-07	2.84144e-06	0.314985	0.564493	0.113262	0.00725872
	JS-Erz-9s	17	core	37.91	2.85	7.49	0.0428	30.34	21.47	<0.027	0.8258	100.95	0.999976	0.309394	0.515727	0.174329	0.000526039	2.38338e-05	0.110793	0.661618	0.20935	0.0182395
	JS-Erz-9s	18	core	38.6	3.18	9.8	0.1018	27.27	21.84	<0.027	0.6596	101.47	0.999987	0.513845	0.309053	0.176563	0.000526039	1.3454e-05	0.122775	0.590688	0.272074	0.0144628
	JS-Erz-9s	19	core	38.54	6.5	5.08	0.1178	27.52	21.97	0.0294	0.4353	100.19	0.999995	0.53695	0.102511	0.360533	4.14182e-08	4.96384e-06	0.251498	0.597704	0.141227	0.0095713
	JS-Erz-9s	22	core	39.02	8.73	3.17	0.0789	26.64	22.18	<0.026	0.2776	100.11	0.999994	0.51627	0.0477301	0.435994	1.20172e-07	5.5214e-06	0.334276	0.572471	0.0872098	0.00604275
	JS-Erz-9s	23	core	39.04	8.17	3.89	0.0246	26.81	22.15	<0.026	0.3444	100.43	0.999994	0.51043	0.0575966	0.431441	0.000526039	6.02605e-06	0.311718	0.574069	0.106741	0.0074719
	JS-Erz-9s	24	core	38.61	7.42	3.49	0.0321	28.33	22.02	0.0451	0.3201	100.28	0.999995	0.510974	0.0790124	0.410008	1.33537e-07	4.62995e-06	0.285405	0.61113	0.0964678	0.00699767
	JS-Erz-9s	25	core	38.93	8.89	2.86	0.0578	27.52	22.15	<0.027	0.3006	100.71	0.999994	0.463751	0.055412	0.480304	0.000526039	6.32105e-06	0.334818	0.581395	0.0773544	0.00643246
	JS-Erz-9s	26	core	38.95	9.1	2.96	0.089	26.83	22.33	<0.027	0.2963	100.55	0.999996	0.506827	0.0544327	0.43821	0.000526039	4.38525e-06	0.344147	0.569045	0.0804392	0.00636879
	JS-Erz-9s	27	core	39.49	10.85	4.99	0.0867	21.43	22.56	<0.026	0.6143	100.06	0.999987	0.483776	0.0404003	0.475807	3.71911e-06	1.28704e-05	0.40474	0.448496	0.133753	0.0130107
	JS-Erz-9s	28	core	38.6	3.81	11.03	0.1145	24.9	21.69	<0.027	0.4702	100.62	0.999992	0.686314	0.130487	0.182665	0.000526039	8.11215e-06	0.146753	0.537818	0.305141	0.0102877
	JS-Erz-9s	30	core	38.99	7.13	5.46	0.215	26.15	21.93	<0.027	0.335	100.2	0.999994	0.58682	0.0509697	0.361679	0.000526039	5.50445e-06	0.275077	0.566107	0.151477	0.00733874
	JS-Erz-9s	32	core	38.79	8.83	3.25	0.0776	26.73	22.28	<0.026	0.3186	100.27	0.999996	0.520083	0.0590824	0.420304	0.000526039	3.85495e-06	0.335192	0.569328	0.0886101	0.00686977
	JS-Erz-9s	35	core	38.87	5.4	8.86	0.1261	25.24	21.78	0.0416	0.3769	100.7	0.999995	0.684933	0.0631089	0.251953	1.17667e-08	5.11908e-06	0.206605	0.541529	0.243671	0.00819441
	JS-Erz-9s	36	core	38.87	7.69	3.65	0.03	27.72	21.95	<0.027	0.3516	100.27	0.999992	0.469852	0.0679347	0.461679	0.000526039	8.34523e-06	0.295117	0.596567	0.10065	0.00766539
	JS-Erz-9s	37	core	39.21	4.95	15.74	0.1974	18.01	21.91	0.0314	0.4138	100.47	0.999989	0.836698	0.0312667	0.132024	8.78863e-09	1.14535e-05	0.186081	0.379757	0.425328	0.00883348
	JS-Erz-9s	40	core	37.72	2.95	5.71	0.0678	31.14	21.56	<0.027	1.0245	100.19	0.999965	0.199707	0.639895	0.159837	0.000526039	3.54424e-05	0.117562	0.695785	0.163477	0.023176
	JS-Erz-9s	41	core	38.66	2.38	15.08	0.0956	22.55	21.5	<0.027	0.7668	101.05	0.999938	0.565719	0.304687	0.129006	0.000526039	6.21855e-05	0.0905684	0.480949	0.411914	0.0165686
	JS-Erz-9s	42	core	38.76	8.15	5.18	0.0456	25.4	22.18	<0.027	0.4609	100.19	0.999996	0.546943	0.0648975	0.387629	0.000526039	4.34984e-06	0.308685	0.540281	0.141108	0.00992556
	JS-Erz-9s	43	core	39.09	8.88	2.91	0.0969	26.93	22.12	<0.026	0.3118	100.35	0.99999	0.447509	0.0521461	0.499809	0.000526039	9.50076e-06	0.338141	0.575406	0.0796999	0.00675281
	JS-Erz-9s	44	core	38.67	8.63	2.74	0.067	27.59	22.16	<0.027	0.2686	100.13	0.999996	0.506931	0.059547	0.432992	0.000526039	4.13817e-06	0.32918	0.590002	0.0749946	0.0058237
	JS-Erz-9s	48	core	39.52	9.49	4.04	0.0573	24.54	22.31	<0.026	0.4778	100.43	0.999984	0.432936	0.0481707	0.518351	0.000526039	1.56075e-05	0.358927	0.521013	0.109784	0.0102765
	JS-Erz-9s	49	core	39.08	8.95	3.14	<0.024	26.77	22.03	<0.026	0.2513	100.23	0.999994	0.502754	0.0374641	0.45925	0.000526039	6.42423e-06	0.339427	0.569468	0.0856854	0.00541956
	JS-Erz-9s	54	mantle	38.67	8.41	3.23	0.0469	27.04	22.13	<0.027	0.3194	99.85	0.999995	0.506341	0.0637676	0.429361	0.000526039	4.71107e-06	0.32235	0.581729	0.0889585	0.00696342
	JS-Erz-9s	55	core	38.68	4.82	10.8	0.1058	23.88	21.71	<0.027	0.4125	100.41	0.999994	0.725378	0.0694828	0.204607	0.000526039	5.51588e-06	0.183903	0.510897	0.296261	0.00893905
	JS-Erz-9s	58	core	38.08	3.53	7.2	0.1318	29.16	21.6	<0.027	0.6794	100.38	0.999986	0.422686	0.350098	0.226675	0.000526039	1.40409e-05	0.138801	0.642601	0.203429	0.0151693
	JS-Erz-9s	59	core	38.95	7.53	2.84	<0.023	29.44	22.06	0.0468	0.3746	101.25	0.999988	0.393182	0.0971248	0.509681	1.92697e-07	1.18305e-05	0.286198	0.628009	0.0776918	0.0081012
	JS-Erz-9s	61	core	39.03	8.71	4.79	0.0716	24.88	22.13	<0.026	0.4025	100.02	0.999994	0.531069	0.0462623	0.422136	0.000526039	6.31952e-06	0.330658	0.53005	0.130602	0.00869016
	JS-Erz-9s	63	core	38.99	7.65	5.51	0.0493	25.58	22.1	<0.027	0.4602	100.35	0.999993	0.536484	0.0642715	0.398712	0.000526039	6.5611e-06	0.291762	0.547386	0.150877	0.00997519
	JS-Erz-9s	64	core	38.83	7.44	6.12	0.0857	25.24	21.89	<0.026	0.4427	100.06	0.999993	0.55667	0.0559638	0.386834	0.000526039	6.63282e-06	0.283357	0.539372	0.167694	0.00957778
	JS-Erz-9s	65	core	39.52	10.93	4.43	0.0734	22.04	22.34	<0.026	0.4443	99.8	0.999987	0.484773	0.0283805	0.486308	0.000526039	1.31738e-05	0.408948	0.462469	0.119138	0.0094449
	JS-Erz-9s	66	core	40.05	12.05	4.07	0.0514	20.54	22.87	<0.026	0.882	100.52	0.999954	0.356295	0.0490954	0.594038	0.000526039	4.56791e-05	0.446258	0.426775	0.108401	0.0185663
	JS-Erz-9s	71	core	39.45	9.97	5.4	0.1146	22.22	22.47	<0.027	0.4367	100.07	0.999994	0.57319	0.0324874	0.39379	0.000526039	6.45095e-06	0.375375	0.469177	0.146118	0.00933022
	JS-Erz-9s	72	core	39.06	9.09	2.95	0.1185	27.05	22.13	<0.027	0.3366	100.73	0.999991	0.43186	0.0536058	0.513999	0.000526039	9.28559e-06	0.342054	0.570971	0.0797741	0.00720114
	JS-Erz-9s	73	core	38.86	9.06	2.72	0.0635	26.9	22.25	<0.026	0.3227	100.19	0.999993	0.461227	0.0623287	0.476438	1.60294e-07	6.50221e-06	0.344581	0.574136	0.0743019	0.00698138
	JS-Erz-9s	76	core	39.04	8.69	4.26	0.1595	25.53	22.14	<0.026	0.3429	100.18	0.999994	0.53681	0.0444854	0.418173	0.000526039	5.50845e-06	0.330972	0.545121	0.11649	0.00741605
	JS-Erz-9s	78	core	39.01	7.98	4.73	0.0704	26	21.96	<0.026	0.3562	100.13	0.999993	0.530529	0.0478887	0.42105	0.000526039	6.88751e-06	0.305095	0.55737	0.129803	0.00773153
	JS-Erz-9s	79	core	38.96	9.12	3.28	0.0342	26.74	22.3	<0.026	0.3149	100.75	0.999996	0.510481	0.0521471	0.436841	0.000526039	4.16855e-06	0.34214	0.562816	0.0883366	0.00670765
	JS-Erz-9s	80	core	38.52	4.42	8.17	0.0919	27.5	21.48	<0.027	0.5552	100.76	0.999986	0.53374	0.155032	0.310688	0.000526039	1.42611e-05	0.169744	0.592533	0.225609	0.0121151
	JS-Erz-9s	81	mantle	38.42	4.24	9.42	0.0852	25.87	21.79	<0.027	0.5244	100.35	0.999994	0.634196	0.153963	0.211309	0.000526039	6.16824e-06	0.164022	0.562075	0.262368	0.0115349
	JS-Erz-9s	82	mantle	38.79	7.11	6.02	0.1249	25.54	22.04	<0.026	0.464	100.12	0.999995	0.568264	0.0720684	0.359136	0.000526039	5.42476e-06	0.273064	0.550471	0.166344	0.0101209
	JS-Erz-9s	83	core	39.02	8.42	4.5	0.0903	25.85	22.42	<0.026	0.3585	100.67	0.999997	0.584096	0.0559762	0.359399	0.000526039	2.91399e-06	0.319372	0.550113	0.122784	0.00773024
	JS-Erz-9s	85	core	38.34	4.33	9.89	0.1199	25.17	21.77	<0.026	0.4555	100.08	0.999996	0.691472	0.119628	0.18837	0.000526039	4.35759e-06	0.167882	0.546784	0.275307	0.0100263
	JS-Erz-9s	86	core	39.12	8.35	3.61	0.0547	27.17	22.09	<0.026	0.3463	100.76	0.999992	0.469313	0.0557281	0.474425	0.000526039	8.2016e-06	0.316459	0.577795	0.0982915	0.00745488
	JS-Erz-9s	87	core	38.99	7.86	5.13	0.0954	25.6	22.15	<0.027	0.4693	100.3	0.999993	0.519739	0.067019	0.412709	0.000526039	6.88428e-06	0.300284	0.548656	0.140878	0.0101819
	JS-Erz-9s	88	core	39.31	8.92	4.81	0.0979	24.58	22.38	<0.026	0.4248	100.55	0.999994	0.537456	0.0482865	0.414251	2.61502e-07	6.13922e-06	0.337851	0.521967	0.131034	0.00914736
	JS-Erz-9s	93	core	38.88	8.82	3.09	0.0507	26.59	22.2	<0.026	0.3266	99.98	0.999994	0.484605	0.0584767	0.456912	1.87424e-07	6.20597e-06	0.337422	0.570713	0.0847726	0.0070922
	JS-Erz-9s	94	core	39.15	9.18	3.88	0.0326	25.12	22.18	<0.027	0.4154	99.96	0.99999	0.463995	0.0496117	0.485857	0.000526039	1.01121e-05	0.348998	0.535908	0.106115	0.00897899
	JS-Erz-9s	95	core	39.3	7.42	8.17	0.1923	22.92	22.02	<0.026	0.4245	100.47	0.999993	0.64156	0.0363577	0.321549	0.000526039	7.12044e-06	0.281177	0.487106	0.222577	0.00913949
	JS-Erz-9s	97	core	38.5	4.21	9.76	0.0932	25.75	21.78	<0.027	0.5105	100.61	0.999994	0.646368	0.143846	0.209253	0.000526039	6.36979e-06	0.162035	0.556571	0.270225	0.011168
	JS-Erz-9s	100	mantle	38.69	8.89	3.2	0.0768	26.96	21.95	<0.027	0.3517	100.12	0.999992	0.444213	0.0557469	0.499506	0.000526039	7.70542e-06	0.335201	0.570663	0.0865936	0.00754202
	JS-Erz-9s	101	core	39.18	9.88	4.67	0.0347	23.81	22.61	<0.026	0.3904	100.57	0.999997	0.592931	0.0408915	0.365648	0.000526039	2.86909e-06	0.368328	0.498258	0.125142	0.00827128
	JS-Erz-9s	103	core	40.13	11.42	5.07	0.0529	20.53	22.71	<0.026	0.5179	100.44	0.999983	0.503411	0.0261123	0.469933	0.000526039	1.7409e-05	0.424903	0.428576	0.135568	0.0109523
	JS-Erz-9s	104	core	38.95	7.49	6.28	0.0303	25.03	21.96	<0.027	0.4138	100.18	0.999994	0.582048	0.0501975	0.367223	0.000526039	5.7753e-06	0.284961	0.53426	0.171839	0.00894027
	JS-Erz-9s	105	core	39.74	10.26	2.66	0.0383	24.82	22.4	<0.027	0.4677	100.38	0.999963	0.331923	0.0510284	0.616485	0.000526039	3.69801e-05	0.38915	0.528216	0.0725563	0.0100773
	JS-Erz-9s	106	core	38.57	3.88	9.84	0.0734	26	21.72	<0.027	0.4091	100.49	0.999994	0.68832	0.127516	0.183632	0.000526039	5.84034e-06	0.150568	0.566009	0.274398	0.00902406
	JS-Erz-9s	107	core	38.98	8.82	3.16	0.0942	26.57	22.19	<0.026	0.3382	100.16	0.999993	0.471567	0.0573745	0.470525	0.000526039	7.3316e-06	0.336728	0.569282	0.0866444	0.00734558
	JS-Erz-9s	108	core	38.23	4.27	9.68	0.1007	25.7	21.66	<0.027	0.4821	100.13	0.999995	0.661529	0.133629	0.20431	0.000526039	5.09641e-06	0.164768	0.556236	0.268431	0.010565
	JS-Erz-9s	109	core	38.87	6.8	5.89	0.0496	26.83	21.85	<0.027	0.3815	100.68	0.999994	0.567072	0.0617537	0.370642	0.000526039	5.64428e-06	0.258484	0.572203	0.161077	0.00823576
	JS-Erz-9s	110	core	38.93	8.24	4.58	0.1062	26.06	22.13	0.036	0.3418	100.42	0.999996	0.562426	0.0492223	0.388348	1.98466e-07	4.07932e-06	0.312614	0.555002	0.125012	0.00737125
	JS-Erz-9s	111	core	38.95	8.24	3.64	0.0623	27.11	22.18	<0.026	0.3757	100.58	0.999994	0.481536	0.0679621	0.450496	9.76376e-08	6.43227e-06	0.313602	0.578792	0.0994876	0.00811872
	JS-Erz-9s	112	core	38.8	9.15	2.81	0.0239	26.9	22.27	<0.026	0.294	100.27	0.999996	0.498116	0.0561825	0.445697	1.7645e-07	4.41376e-06	0.346282	0.570961	0.0764369	0.00632011
	JS-Erz-9s	119	core	39.23	9.17	4.16	0.0596	24.87	22.21	<0.026	0.5515	100.27	0.999984	0.413437	0.0604863	0.525535	0.000526039	1.57553e-05	0.347064	0.527996	0.113083	0.0118571
	JS-Erz-9s	120	core	38.91	8.24	4.66	0.1065	25.93	22.14	<0.027	0.3343	100.34	0.999996	0.575914	0.0476801	0.375876	0.000526039	3.67353e-06	0.313159	0.552428	0.12719	0.00722291
	JS-Erz-9s	122	core	39.3	8.94	4.97	<0.023	24.53	22.48	<0.026	0.2986	100.54	0.999998	0.643305	0.033847	0.32232	0.000526039	2.43518e-06	0.338087	0.520557	0.134935	0.00642148
	JS-Erz-9s	123	core	38.6	6.22	9.14	0.1822	23.33	21.78	<0.027	0.4887	99.75	0.999994	0.661169	0.0599913	0.278308	0.000526039	5.85519e-06	0.237823	0.500323	0.251238	0.0106159
	JS-Erz-9s	124	core	39.12	8.33	3.83	0.1351	26.66	22.16	<0.027	0.348	100.57	0.999993	0.498783	0.0551664	0.445517	0.000526039	6.8723e-06	0.317463	0.570131	0.104875	0.0075316
	JS-Erz-9s	125	core	38.54	4.12	8.75	0.0674	26.97	21.65	<0.027	0.5478	100.65	0.999989	0.572892	0.173511	0.25306	0.000526039	1.0801e-05	0.159386	0.585247	0.243326	0.0120414
	JS-Erz-9s	128	core	39.14	8.47	5.04	0.0894	24.82	22.28	<0.027	0.4683	100.33	0.999993	0.525366	0.0576157	0.416486	0.000526039	6.74427e-06	0.322392	0.529752	0.137739	0.0101175
	JS-Erz-9s	133	core	39.45	9.6	5.13	0.0742	22.74	22.42	<0.027	0.5294	99.94	0.999989	0.506404	0.0444352	0.448624	0.000526039	1.10017e-05	0.36427	0.484409	0.139911	0.0114107
	JS-Erz-9s	134	core	39.29	8.51	4.75	0.1199	25.03	22	<0.027	0.4059	100.12	0.999988	0.48573	0.0428849	0.470847	0.000526039	1.22487e-05	0.324771	0.535989	0.130444	0.00879658
	JS-Erz-9s	135	core	39.29	9.7	4.8	0.0877	23.49	22.17	<0.027	0.4594	100.01	0.999989	0.485958	0.0372632	0.476241	0.000526039	1.11324e-05	0.364883	0.495505	0.129795	0.00981739
	JS-Erz-9s	136	core	38.65	4.59	9.44	0.1959	25.36	21.65	<0.027	0.4619	100.35	0.999992	0.651999	0.102826	0.24464	0.000526039	8.3495e-06	0.177546	0.549993	0.262315	0.0101455
	JS-Erz-9s	137	core	39.04	7.65	3.09	0.0725	27.91	22.01	<0.027	0.3745	100.15	0.999985	0.411685	0.0804488	0.507325	0.000526039	1.51585e-05	0.297097	0.608204	0.0864281	0.00827144
	JS-Erz-9s	138	core	39.04	8.35	3.62	0.0546	27.12	22.06	<0.027	0.374	100.62	0.999991	0.45339	0.0600421	0.486033	0.000526039	9.02567e-06	0.316439	0.576987	0.098514	0.00806024
	JS-Erz-9s	139	core	39.58	9.36	4.39	<0.023	24.67	22.66	<0.026	0.3786	101.06	0.999995	0.560096	0.0447525	0.395147	2.77645e-07	4.53965e-06	0.352302	0.520765	0.118827	0.00810562
	JS-Erz-9s	141	core	38.05	2.75	10.66	0.1023	26.66	21.56	<0.027	0.4717	100.25	0.999992	0.611987	0.262668	0.124812	0.000526039	7.53359e-06	0.107158	0.583547	0.298845	0.0104496
	JS-Erz-9s	142	core	38.65	4.57	9.73	0.1755	25.42	21.82	<0.026	0.4661	100.86	0.999994	0.673196	0.109276	0.217522	2.25444e-09	5.55311e-06	0.175109	0.546593	0.268146	0.010151
	JS-Erz-9s	146	core	39.3	8.7	5.65	0.0676	23.99	22.37	<0.026	0.4355	100.53	0.999995	0.577182	0.0448988	0.377913	2.70021e-07	5.20183e-06	0.328718	0.508489	0.153446	0.00934673
	JS-Erz-9s	148	core	39.03	8.69	3.65	0.0271	25.91	22.07	<0.027	0.3425	99.71	0.999992	0.487024	0.0487386	0.463703	0.000526039	8.42254e-06	0.333802	0.558122	0.100609	0.00746618
	JS-Erz-9s	149	core	38.86	5.51	7.54	0.1109	26.4	22	<0.027	0.343	100.76	0.999997	0.686433	0.072399	0.240639	0.000526039	3.08424e-06	0.212302	0.571223	0.208951	0.00752358
	JS-Erz-9s	152	core	39.54	10.42	4.52	0.0425	22.92	22.37	<0.026	0.4858	100.32	0.999987	0.468223	0.0356072	0.496156	9.71793e-07	1.29696e-05	0.388701	0.479878	0.121128	0.0102926
	JS-Erz-9s	157	core	39.2	8.17	6.22	0.0369	24.38	22.17	<0.027	0.3902	100.58	0.999995	0.603892	0.0399893	0.355588	0.000526039	4.63554e-06	0.307863	0.515368	0.168422	0.00834658
	JS-Erz-9s	158	core	38.85	8.6	3.06	0.0691	27.06	22.18	<0.026	0.2839	100.12	0.999995	0.513603	0.0550806	0.430786	0.000526039	4.75543e-06	0.328941	0.580817	0.0840701	0.00617181
	JS-Erz-9s	159	core	38.95	9.22	4.3	<0.024	25.15	22.16	<0.026	0.3663	100.18	0.999995	0.529782	0.0423749	0.427312	0.000526039	4.94165e-06	0.346201	0.529756	0.116224	0.00781957
	JS-Erz-9s	161	core	38.41	4.04	9.01	0.0958	26.79	21.46	<0.027	0.5404	100.36	0.999987	0.572969	0.16428	0.262212	0.000526039	1.31207e-05	0.156447	0.581326	0.250348	0.0118787
	JS-Erz-9s	165	core	38.66	4.13	7.68	0.1497	28.17	21.72	<0.027	0.5478	101.06	0.999988	0.527837	0.198539	0.273086	0.000526039	1.20936e-05	0.160272	0.613455	0.214198	0.0120748
	JS-Erz-9s	167	core	38.19	4.56	8.92	0.0777	26.07	21.83	<0.027	0.4959	100.17	0.999996	0.651471	0.142273	0.205727	0.000526039	3.56333e-06	0.176277	0.565183	0.247651	0.0108887
	JS-Erz-9s	67	core	38.44	5.14	8.1	0.1636	26.17	21.64	<0.027	0.4407	100.1	0.999994	0.62953	0.0961405	0.273797	0.000526039	5.81575e-06	0.198464	0.566969	0.224893	0.00967388
	JS-Erz-13s	1	core	38.88	7.78	5.26	0.0885	25.84	22.09	<0.027	0.3428	100.28	0.999997	0.599266	0.0491531	0.351051	0.000526039	3.48558e-06	0.296293	0.552204	0.144075	0.00742809
	JS-Erz-13s	3	core	38.41	7.76	2.74	<0.024	29.04	21.7	0.0326	0.3608	100.06	0.999988	0.381628	0.0848711	0.533488	1.26012e-07	1.22102e-05	0.29598	0.621064	0.0751459	0.00781057
	JS-Erz-13s	4	core	38.32	1.8	13.66	0.1176	24.21	21.56	0.0292	0.8781	100.58	0.999931	0.371702	0.552458	0.0757704	2.6387e-11	6.93992e-05	0.0701608	0.528456	0.381968	0.019415
	JS-Erz-13s	5	core	37.84	4.63	0.7815	0.0325	35.82	21.4	0.0309	0.2264	100.75	0.999908	0.193639	0.357657	0.448612	1.9089e-09	9.166e-05	0.181967	0.790855	0.0221126	0.00506574
	JS-Erz-13s	7	core	39.61	7.42	9.88	0.1024	21.33	22.25	<0.026	0.4134	101.03	0.999994	0.714163	0.0282738	0.257031	0.000526039	5.79234e-06	0.277778	0.447761	0.265672	0.00878939
	JS-Erz-13s	9	core	39.04	7.96	3.33	0.0476	27.66	22.16	<0.027	0.3639	100.57	0.999991	0.456694	0.0741175	0.468654	0.000526039	8.56921e-06	0.305354	0.594971	0.09174	0.00793518
	JS-Erz-13s	10	core	38.83	7.63	3.4	0.0334	28.16	22.18	<0.027	0.3953	100.64	0.999993	0.458304	0.0941144	0.447049	0.000526039	6.84596e-06	0.292291	0.605449	0.0936467	0.00861349
	JS-Erz-13s	11	core	38.89	4.94	6.62	0.0639	28.47	21.82	<0.027	0.5099	101.34	0.999989	0.514646	0.148945	0.336397	4.4754e-09	1.11745e-05	0.190483	0.615225	0.183131	0.0111616
	JS-Erz-13s	12	core	39.31	9.52	2.24	0.0292	26.52	22.16	<0.026	0.3477	100.13	0.999975	0.349575	0.0545686	0.595305	0.000526039	2.51511e-05	0.36318	0.567866	0.0614226	0.00753138
	JS-Erz-13s	15	core	37.9	2.34	10.46	0.0513	27.12	21.51	<0.027	0.6813	100.08	0.999982	0.432503	0.456797	0.110156	0.000526039	1.76045e-05	0.0920276	0.597513	0.295255	0.0152046
	JS-Erz-13s	19	core	38.9	5.53	11.35	0.1769	22.03	21.79	<0.027	0.4559	100.24	0.999992	0.72469	0.0509822	0.223795	0.000526039	7.54576e-06	0.210413	0.469663	0.310074	0.00985018
	JS-Erz-13s	20	core	39.02	8.17	2.81	0.0414	28.4	22.16	0.0342	0.4011	101.03	0.999988	0.386393	0.0876555	0.525938	2.4617e-07	1.2485e-05	0.309962	0.604807	0.0765768	0.00865434
	JS-Erz-13s	23	core	39.56	6.12	12.66	0.1225	19.77	22.23	0.0448	0.3615	100.87	0.999995	0.812243	0.0254835	0.162269	4.48525e-08	5.21052e-06	0.230724	0.418271	0.343252	0.00775194
	JS-Erz-13s	27	core	37.61	2.6	2.13	0.0556	36.82	21.18	<0.027	0.9611	101.37	0.999637	0.0561387	0.801127	0.141846	0.000526039	0.000362654	0.102512	0.815611	0.060311	0.0215658
	JS-Erz-13s	30	core	39.21	7.58	3.73	0.0747	28.18	22.2	<0.027	0.3721	101.36	0.999992	0.47017	0.0769354	0.45236	0.000526039	7.91641e-06	0.288352	0.601583	0.102017	0.00804782
	JS-Erz-13s	31	core	38.7	6.94	2.78	<0.023	29.77	21.89	<0.026	0.6448	100.74	0.999962	0.263645	0.173743	0.562049	0.000526039	3.74817e-05	0.26704	0.642127	0.0767489	0.0140845
	JS-Erz-13s	32	core	38.37	7.5	1.76	0.0299	30.13	21.87	<0.026	0.274	99.95	0.999987	0.369804	0.109748	0.51991	0.000526039	1.2818e-05	0.290442	0.654536	0.0489902	0.00603213
	JS-Erz-13s	34	core	39.8	6.78	12.06	0.1201	19.32	22.06	0.0336	0.4094	100.59	0.999987	0.747982	0.0220672	0.229938	6.00369e-08	1.29185e-05	0.255524	0.408739	0.326958	0.00877896
	JS-Erz-13s	35	core	39.64	7.24	11.76	0.2068	19.13	22.22	0.0285	0.3381	100.56	0.999995	0.799313	0.0168993	0.183783	5.6649e-08	5.24167e-06	0.27185	0.403278	0.317659	0.0072127
	JS-Erz-13s	38	core	38.57	6.04	4.2	0.0634	29.4	21.69	<0.027	0.4436	100.4	0.999987	0.430997	0.125851	0.442614	0.000526039	1.2544e-05	0.233959	0.639299	0.11698	0.0097622
	JS-Erz-13s	41	core	37.69	3.88	0.5069	0.0719	37.3	21.25	<0.028	0.3352	101.04	0.999314	0.0730179	0.58465	0.341121	0.000526039	0.000685335	0.152987	0.82513	0.0143674	0.0075163
	JS-Erz-13s	46	mantle	37.42	3.8	1.69	0.0323	35.85	21.42	<0.028	0.4434	100.67	0.999961	0.177998	0.545443	0.275994	0.000526039	3.85264e-05	0.14987	0.792288	0.0479119	0.00993054
	JS-Erz-13s	48	core	37.66	3.52	1.3693	0.0517	35.52	21.39	<0.027	1.55	101.08	0.998883	0.0295334	0.787276	0.181549	0.000526039	0.00111619	0.139042	0.787403	0.0388783	0.0346771
	JS-Erz-13s	50	core	38.3	5.48	1.4	<0.024	32.61	21.6	<0.028	1.68	101.07	0.998805	0.0479706	0.508892	0.441417	0.000526039	0.00119414	0.212777	0.710863	0.039095	0.037265
	JS-Erz-13s	52	core	38.79	7.15	3.78	<0.024	28.29	21.92	<0.026	0.6224	100.58	0.999978	0.342406	0.129708	0.527338	0.000526039	2.15872e-05	0.273884	0.608298	0.104265	0.0135528
	JS-Erz-13s	54	core	38.37	6.52	3.51	0.0272	29.67	21.93	<0.027	0.2798	100.31	0.999997	0.546415	0.0958163	0.357239	0.000526039	3.20511e-06	0.252211	0.643855	0.0977861	0.00614703
	JS-Erz-13s	55	core	38.68	6.79	3.89	0.0361	29.21	21.89	<0.027	0.4213	100.92	0.999991	0.440966	0.106861	0.451638	0.000526039	8.63585e-06	0.258932	0.62531	0.106619	0.00913877
	JS-Erz-13s	56	core	38.03	5.45	5.27	0.099	29.03	21.48	<0.026	0.6481	100.02	0.999986	0.399235	0.188675	0.412076	1.56043e-08	1.39972e-05	0.210485	0.62898	0.146317	0.0142193
	JS-Erz-13s	57	core	37.96	3.44	5.41	0.0681	31.41	21.37	<0.027	0.6732	100.33	0.999973	0.319471	0.414351	0.265624	0.000526039	2.74602e-05	0.135635	0.695734	0.15353	0.0151021
	JS-Erz-13s	58	core	38.34	4.92	4.2	0.0317	31.38	21.53	<0.027	0.4007	100.82	0.999988	0.436132	0.178298	0.385032	0.000526039	1.16475e-05	0.190953	0.683042	0.117164	0.00884132
	JS-Erz-13s	59	core	38.1	4.8	2.16	0.043	33.81	21.74	<0.027	0.4033	101.09	0.99998	0.28809	0.331777	0.380112	3.21597e-09	1.98284e-05	0.18791	0.742276	0.0608533	0.00896081
	JS-Erz-13s	60	core	38.69	7.26	3.48	0.1386	28.4	22.01	0.0765	0.5701	100.63	0.999984	0.361129	0.134094	0.50476	9.95475e-07	1.55643e-05	0.279011	0.612255	0.0962854	0.0124487
	JS-Erz-13s	67	core	38.84	7.56	2.5	<0.023	29.27	21.93	<0.027	0.393	100.5	0.99998	0.344991	0.102854	0.551609	0.000526039	2.00869e-05	0.290815	0.631517	0.0690748	0.00859264
	JS-Erz-13s	68	core	38.29	4.24	8.13	0.0394	27.26	21.67	0.0353	0.9187	100.58	0.99998	0.416351	0.291169	0.29246	1.21411e-08	2.01451e-05	0.163777	0.590459	0.225608	0.0201571
	JS-Erz-13s	69	core	38.63	6.38	3.27	0.037	30.05	21.81	0.0305	0.5881	100.8	0.999974	0.310508	0.174427	0.51504	6.5553e-08	2.60373e-05	0.246109	0.650348	0.0906455	0.012897
	JS-Erz-13s	70	core	38.09	5.72	3.55	0.0311	30.3	21.44	<0.027	0.6586	99.8	0.999968	0.289899	0.213877	0.495666	0.000526039	3.22956e-05	0.222927	0.663134	0.0993372	0.0146016
	JS-Erz-13s	72	core	38.77	7.1	4.57	<0.024	27.67	21.93	<0.027	0.3521	100.42	0.999995	0.535019	0.0696387	0.394811	0.000526039	5.25719e-06	0.271771	0.594571	0.125995	0.00766277
	JS-Erz-13s	74	core	39.16	6.1	11.26	0.0609	21.07	21.71	0.0281	0.4182	99.8	0.999989	0.717887	0.0330723	0.249029	1.9888e-08	1.12201e-05	0.232334	0.450386	0.308229	0.0090509
	JS-Erz-13s	75	core	38.23	1.76	13.96	0.0936	24.14	21.26	<0.027	0.9625	100.42	0.999864	0.346776	0.562486	0.0900753	0.000526039	0.000136417	0.0679745	0.523337	0.387553	0.0211348
	JS-Erz-13s	78	core	38.07	4.68	4.04	0.0457	31.68	21.31	<0.027	0.3742	100.23	0.999987	0.431776	0.183664	0.384547	1.81816e-09	1.3047e-05	0.183087	0.694966	0.11364	0.00830703
	JS-Erz-13s	79	core	38.35	3.69	7.71	0.0649	28.14	21.56	0.0269	1.2171	100.76	0.999941	0.288407	0.428325	0.28321	4.53134e-09	5.86368e-05	0.143348	0.614061	0.215688	0.0269027
	JS-Erz-13s	80	core	38.19	5.38	2.63	<0.024	31.81	21.35	<0.027	1.0749	100.47	0.999801	0.134685	0.338016	0.526574	0.000526039	0.000198664	0.208972	0.693867	0.0734137	0.0237476
	JS-Erz-13s	85	core	39.69	7.57	10.09	0.1061	20.71	22.06	0.0281	0.4163	100.68	0.99999	0.689965	0.0234848	0.28654	8.7703e-08	1.0093e-05	0.283653	0.435598	0.271875	0.00887451
	JS-Erz-13s	87	core	38.51	6.97	3.41	0.086	28.91	21.83	0.0307	0.3948	100.15	0.999991	0.431667	0.104927	0.463397	6.04277e-08	9.44995e-06	0.269513	0.627085	0.0947298	0.00867245
	JS-Erz-13s	91	core	37.61	1.8	7.36	0.0937	32.42	20.8	0.0372	0.8429	100.97	0.999873	0.172406	0.715105	0.112362	2.04094e-11	0.000127417	0.0700774	0.706002	0.205332	0.0185893
	JS-Erz-13s	93	core	38.39	4.8	3.68	<0.023	32.25	21.9	<0.027	0.412	101.46	0.999992	0.420254	0.247511	0.331701	0.000526039	7.73179e-06	0.186298	0.701956	0.102664	0.0090812
	JS-Erz-13s	95	core	38.68	5.39	7.99	0.0445	25.89	21.79	<0.026	0.5194	100.3	0.999992	0.591043	0.105075	0.303348	0.000526039	7.88371e-06	0.207719	0.559692	0.221212	0.0113771
	JS-Erz-13s	96	core	38.76	7.14	3.01	0.0643	29.49	21.77	<0.026	0.3582	100.64	0.999985	0.392812	0.0902983	0.516875	3.3638e-08	1.46452e-05	0.274148	0.634913	0.0831255	0.0078138
	JS-Erz-13s	100	core	37.82	5.33	1.96	<0.023	32.64	21.37	<0.027	1.1774	100.34	0.999754	0.0967557	0.437871	0.464602	0.000526039	0.00024607	0.207333	0.711729	0.054926	0.0260115
	JS-Erz-13s	103	core	38.4	4.62	8.48	0.0828	26.47	21.66	<0.027	0.4223	100.14	0.999995	0.651925	0.111741	0.235803	0.000526039	5.13146e-06	0.179098	0.575409	0.236189	0.00930442
	JS-Erz-13s	104	core	39.22	5.56	12.71	0.0786	20.52	22.21	<0.026	0.4384	100.76	0.999995	0.793465	0.0433413	0.162663	0.000526039	4.9036e-06	0.210213	0.435216	0.345148	0.0094222
	JS-Erz-13s	105	core	38.14	1.3658	14.31	0.0842	24.34	21.32	<0.027	0.5929	100.15	0.999933	0.409808	0.539103	0.0504963	0.000526039	6.64861e-05	0.0532722	0.532556	0.401036	0.0131354
	JS-Erz-13s	107	core	38.44	5.98	3.62	0.069	30.02	21.7	<0.027	0.458	100.29	0.999986	0.3924	0.153414	0.453645	0.000526039	1.43689e-05	0.232753	0.655787	0.101328	0.0101328
	JS-Erz-13s	109	core	38.23	5.26	4.09	0.0469	30.41	21.57	<0.028	0.6414	100.24	0.999976	0.329181	0.236368	0.433901	0.000526039	2.35347e-05	0.205126	0.665911	0.114737	0.0142254
	JS-Erz-13s	112	core	39.48	6.79	10.19	0.059	21.85	22.22	<0.027	0.4683	101.06	0.999994	0.702542	0.0399066	0.257019	0.000526039	6.40306e-06	0.254926	0.46026	0.274829	0.00998474
	JS-Erz-13s	114	core	38.09	5.3	0.9551	<0.024	34.78	21.66	<0.027	0.2709	101.06	0.999943	0.214303	0.307835	0.47728	0.000526039	5.6764e-05	0.206659	0.760578	0.0267559	0.00600676
	JS-Erz-13s	115	core	38.84	7.38	4.07	0.1759	27.62	21.97	<0.027	0.3822	100.46	0.999992	0.485512	0.0756285	0.438852	4.98314e-08	7.62216e-06	0.283569	0.595563	0.112525	0.00834323
	JS-Erz-13s	116	core	38.73	7.59	3.13	0.0502	28.46	22.05	<0.027	0.286	100.31	0.999995	0.505542	0.0721548	0.421772	0.000526039	5.06608e-06	0.292093	0.614932	0.0867255	0.00624958
	JS-Erz-13s	117	core	38.54	4.79	7.97	0.138	27.16	21.8	<0.027	0.4534	100.87	0.999995	0.620375	0.12492	0.254175	0.000526039	5.03654e-06	0.184232	0.585753	0.220114	0.00990099
	JS-Erz-13s	118	core	38.76	6.78	3.81	0.0545	29	21.83	<0.027	0.3999	100.67	0.999989	0.43748	0.0975288	0.464981	2.36916e-08	1.08103e-05	0.260519	0.625479	0.105274	0.00872839
	JS-Erz-13s	119	core	38.32	4.8	1.86	<0.024	32.86	21.8	<0.026	1.65	101.3	0.9995	0.060273	0.606829	0.332398	5.45163e-08	0.000500248	0.188109	0.722875	0.0524017	0.036614
	JS-Erz-13s	120	core	39.23	6.73	9.68	0.1445	22.19	22.12	<0.027	0.4754	100.58	0.999994	0.689347	0.0446629	0.265458	0.000526039	6.16954e-06	0.254721	0.471675	0.263372	0.0102321
	JS-Erz-13s	121	core	37.78	3.5	1.46	0.0408	35.85	21.21	<0.028	0.808	100.64	0.99951	0.0706303	0.654493	0.273861	0.000526039	0.000489487	0.13924	0.800757	0.0417218	0.0182805
	JS-Erz-13s	122	core	38.28	1.5875	14.24	0.157	24.06	21.25	<0.027	0.8956	100.48	0.999844	0.339942	0.582969	0.0764063	0.000526039	0.000155937	0.0614598	0.52245	0.396387	0.0197035
	JS-Erz-13s	126	mantle	38.12	2.12	13.54	0.1198	24.09	21.13	<0.027	0.8063	99.92	0.999916	0.460227	0.410423	0.12874	0.000526039	8.38863e-05	0.0819361	0.523435	0.376873	0.0177556
	JS-Erz-13s	127	core	39.07	6.69	6.43	0.2511	26.13	21.74	0.0464	0.4734	100.82	0.999987	0.511548	0.0647648	0.423674	9.38289e-08	1.30237e-05	0.254841	0.558753	0.176159	0.0102469
	JS-Erz-13s	132	core	39.12	7.45	3.55	0.0264	28.54	22.12	0.0317	0.3794	101.23	0.999991	0.446928	0.0834743	0.469588	8.07794e-08	9.36764e-06	0.284175	0.61021	0.0973934	0.00822174
	JS-Erz-13s	133	core	38.8	7.13	4	0.1045	28.04	22.01	<0.027	0.3585	100.47	0.999994	0.505407	0.0811786	0.413409	2.51984e-08	6.15237e-06	0.27503	0.606304	0.110815	0.00785082
	JS-Erz-13s	136	core	38.07	1.76	13.39	0.1783	24.85	21.35	<0.027	0.8903	100.52	0.999924	0.346395	0.574291	0.0787117	0.000526039	7.55839e-05	0.0683676	0.53951	0.372554	0.019569
	JS-Erz-13s	141	core	37.53	3.22	1.2199	<0.023	37.18	21.48	<0.027	0.2948	100.98	0.999952	0.169521	0.612033	0.218397	1.95289e-10	4.82434e-05	0.128304	0.830123	0.0349067	0.00666644
	JS-Erz-13s	142	mantle	38.79	6.41	3.91	<0.023	29.38	22.11	<0.027	0.4613	101.08	0.999992	0.442185	0.142008	0.415273	0.000526039	8.1364e-06	0.246893	0.634796	0.108225	0.0100865
	JS-Erz-13s	145	core	38.39	2.06	14.29	0.0865	23.92	21.48	0.0271	0.6901	100.96	0.999958	0.520571	0.38098	0.0984068	3.10263e-11	4.23174e-05	0.0788075	0.513318	0.392886	0.0149882
	JS-Erz-13s	146	core	38.99	5.39	11.67	0.1028	21.94	22.09	0.0398	0.4784	100.7	0.999995	0.749825	0.060542	0.189627	2.6142e-08	5.06982e-06	0.20438	0.467035	0.318275	0.0103103
	JS-Erz-13s	153	core	39.16	8.83	2.96	<0.023	27.48	22.07	<0.027	0.193	100.7	0.999996	0.546937	0.0317595	0.420774	0.000526039	4.25457e-06	0.333389	0.582188	0.0802847	0.00413839
	JS-Erz-13s	154	core	39.35	5.59	11.64	0.1388	21.68	21.94	0.042	0.415	100.79	0.999991	0.743198	0.0413931	0.215401	2.16236e-08	8.507e-06	0.212167	0.461472	0.317418	0.00894299
	JS-Erz-13s	155	core	39.01	7.6	3.26	0.0383	28.91	22.07	0.031	0.3991	101.33	0.999989	0.410166	0.0897324	0.50009	1.02602e-07	1.0857e-05	0.288039	0.614528	0.0888314	0.0086014
	JS-Erz-13s	156	core	38.65	5.99	3.75	<0.023	29.86	21.89	<0.027	0.5719	100.72	0.999982	0.356674	0.18584	0.456942	0.000526039	1.81812e-05	0.232691	0.65016	0.104535	0.0126145
	JS-Erz-13s	157	core	38.64	7.01	3.16	<0.024	29.2	21.94	<0.026	0.4154	100.41	0.999989	0.404681	0.117405	0.477903	5.11739e-08	1.11552e-05	0.270636	0.632597	0.0876519	0.0091158
	JS-Erz-13s	158	core	38.58	5.01	10.47	0.219	23.74	21.58	<0.027	0.5013	100.11	0.999991	0.667429	0.0796349	0.252401	0.000526039	9.20744e-06	0.191637	0.509598	0.287869	0.0108963
	JS-Erz-13s	162	core	38.8	8.55	2.28	0.0551	27.75	22.38	0.0267	0.4676	100.31	0.999987	0.352926	0.122505	0.524556	4.57601e-07	1.3339e-05	0.328701	0.598233	0.0628572	0.010208
	JS-Erz-13s	163	core	37.4	3.11	0.7252	<0.024	38.15	21.4	<0.028	0.2055	101.01	0.999919	0.145654	0.638197	0.215541	0.000526039	8.14287e-05	0.123644	0.850993	0.0207242	0.00463875
	JS-Erz-13s	164	core	39.48	0.5454	30.84	0.2102	6.05	21.38	<0.026	1.99	100.5	0.256442	0.0890239	0.164683	0.00260048	0.000526039	0.743167	0.0200172	0.12444	0.813955	0.0415878
	JS-Erz-13s	166	core	37.97	4.74	1.69	0.0324	34.5	21.48	<0.027	0.4361	100.87	0.999945	0.207615	0.36194	0.429864	0.000526039	5.47448e-05	0.185453	0.757281	0.0475691	0.00969679
	JS-Erz-13s	168	core	37.34	3.25	2.99	<0.024	34.98	21.45	<0.027	0.5946	100.62	0.999978	0.193625	0.613082	0.192745	0.000526039	2.1593e-05	0.128039	0.774041	0.0845855	0.0133347
	JS-Erz-13s	169	core	38.52	6.91	2.57	0.0412	30.31	22.04	<0.027	0.3681	100.77	0.999991	0.398361	0.139874	0.46123	0.000526039	8.75211e-06	0.265898	0.654916	0.0711394	0.00804692
	JS-Erz-13s	171	core	39.33	6.22	10.22	0.1104	22.49	22.17	<0.027	0.4445	101	0.999995	0.717422	0.0468784	0.235694	1.58928e-08	5.43018e-06	0.235416	0.477158	0.27787	0.00955647
	JS-Erz-13s	172	core	37.95	5	3.39	<0.024	32	21.59	0.0272	0.4989	100.47	0.999987	0.34706	0.267778	0.385148	7.45206e-09	1.32185e-05	0.194908	0.699179	0.0948826	0.0110309
	JS-Erz-13s	177	core	38.8	5.38	5.58	<0.023	29.4	21.86	<0.027	0.4001	101.44	0.999994	0.537149	0.121692	0.340627	0.000526039	6.38011e-06	0.206001	0.631624	0.15367	0.00870519
	JS-Erz-13s	178	core	38.25	4.4	8.65	0.1575	26.41	21.48	<0.026	0.8548	100.21	0.999977	0.45319	0.226352	0.319909	0.000526039	2.3167e-05	0.169856	0.571589	0.239816	0.0187387
	JS-Erz-13s	179	core	39.12	6.14	8.47	0.0627	24.86	22.2	0.0502	0.4292	101.34	0.999996	0.679407	0.0650036	0.255585	6.2521e-08	3.57882e-06	0.232241	0.527942	0.23058	0.00923649
	JS-Erz-13s	180	core	38.06	1.88	11.23	0.1769	26.92	21.04	0.0288	1.35	100.68	0.999725	0.198653	0.687636	0.113435	5.75011e-11	0.000275262	0.0727812	0.585049	0.312531	0.0296394
	JS-Erz-13s	182	mantle	39.39	5.82	10.71	0.1116	22.31	22.33	<0.026	0.4447	101.13	0.999995	0.745891	0.0532922	0.200287	0.000526039	4.52957e-06	0.221537	0.475919	0.292925	0.00961893
	JS-Erz-13s	183	core	38.15	3.42	8.55	0.1645	28.48	21.24	0.0996	0.7165	100.81	0.999971	0.433658	0.295639	0.270674	8.34338e-09	2.85457e-05	0.131746	0.615747	0.236813	0.0156942
	JS-Erz-13s	185	core	39.1	6.54	9.94	0.0907	22.01	22.09	<0.026	0.4376	100.23	0.999995	0.720382	0.0422397	0.236847	0.000526039	4.9068e-06	0.249009	0.469703	0.271828	0.00946067
	JS-Erz-13s	186	core	38.33	6.44	3.52	0.0542	29.71	21.7	<0.027	0.3568	100.11	0.999992	0.455939	0.110978	0.432549	0.000526039	7.63655e-06	0.249119	0.645151	0.0978861	0.00784418
	JS-Erz-13s	187	core	39.38	5.63	13.32	0.1368	19.8	22.34	0.0309	0.3727	101.01	0.999996	0.835799	0.0318367	0.132361	1.55318e-08	3.61597e-06	0.212362	0.418728	0.360932	0.00797815
	JS-Erz-13s	188	core	38.7	7.78	3.27	0.039	28.23	22.1	<0.027	0.3925	100.53	0.999993	0.44646	0.091723	0.461284	0.000526039	6.95686e-06	0.297013	0.604652	0.0898179	0.00851693
	JS-Erz-13s	189	core	38.34	4.66	5.77	0.0384	29.69	21.83	<0.027	0.4498	100.78	0.999995	0.52797	0.191939	0.27956	0.000526039	5.27995e-06	0.181211	0.647516	0.161336	0.00993737
	JS-Erz-13s	192	core	38.93	5.98	9.3	0.0598	24.12	21.98	<0.027	0.3821	100.75	0.999997	0.716738	0.0507437	0.231989	0.000526039	3.42533e-06	0.22633	0.512341	0.253112	0.00821664
	JS-Erz-13s	197	core	38.73	6.03	3.87	<0.023	29.66	21.95	<0.027	0.8325	101.08	0.999967	0.279308	0.237453	0.48268	0.000526039	3.34559e-05	0.232535	0.641809	0.107414	0.018242
	JS-Erz-14s	1	core	38.16	5.9	2.25	0.043	32.33	21.63	<0.027	0.2953	100.61	0.999989	0.38115	0.1617	0.456613	0.000526039	1.14565e-05	0.228403	0.702446	0.0626533	0.00649738
	JS-Erz-14s	2	core	37.85	3.58	4.77	0.0332	31.95	21.53	<0.027	0.7705	100.49	0.999975	0.265015	0.48604	0.248394	0.000526039	2.48243e-05	0.141012	0.706564	0.135164	0.017259
	JS-Erz-14s	3	core	36.95	2.96	0.752	0.0933	37.63	21.03	0.0348	0.2615	99.71	0.999842	0.109508	0.683053	0.207281	1.90081e-10	0.000158145	0.11943	0.852737	0.0218286	0.00600495
	JS-Erz-14s	6	core	37.46	0.8307	8.45	0.0683	31.44	21.14	<0.028	1.0628	100.47	0.999701	0.0412385	0.947059	0.0108767	0.000526039	0.000299265	0.0330262	0.701348	0.241614	0.0240115
	JS-Erz-14s	17	core	39	6.62	12.4	0.0897	19.2	22.07	0.0737	0.3744	99.83	0.999996	0.814926	0.0234647	0.161605	2.74081e-07	3.77812e-06	0.249566	0.406247	0.336171	0.00801587
	JS-Erz-14s	18	core	38.33	4.53	8.51	0.0627	26.22	21.52	<0.027	0.4127	99.59	0.999994	0.649941	0.10724	0.242286	0.000526039	6.45951e-06	0.177194	0.574668	0.238986	0.00915194
	JS-Erz-14s	19	core	38.19	5.88	3.86	<0.024	30.14	21.76	<0.027	0.4023	100.26	0.999994	0.462807	0.151132	0.386054	1.09961e-08	6.21634e-06	0.227843	0.65561	0.107689	0.00885779
	JS-Erz-14s	21	core	38.03	3.32	9.59	0.1565	26.78	21.18	<0.028	0.8038	99.85	0.999963	0.444155	0.301628	0.253654	0.000526039	3.68412e-05	0.129043	0.584829	0.268343	0.0177848
	JS-Erz-14s	23	core	37.38	0.7192	5.98	0.1015	34.9	20.69	<0.028	0.8658	100.66	0.999114	0.0267609	0.961349	0.011004	2.28697e-14	0.000885808	0.0286662	0.780358	0.171367	0.0196085
	JS-Erz-14s	27	core	37.7	2.36	6.39	0.1279	31.61	21.15	<0.027	0.9736	100.32	0.999918	0.181005	0.673385	0.145002	0.000526039	8.21489e-05	0.0935873	0.702656	0.181836	0.0219205
	JS-Erz-14s	29	core	38.33	3.87	10.15	0.0971	25.35	21.52	<0.027	0.7111	100.03	0.999982	0.547698	0.208041	0.243716	0.000526039	1.83349e-05	0.150017	0.551393	0.282923	0.0156663
	JS-Erz-14s	35	core	38.38	6.36	4.54	0.0544	28.46	21.56	<0.027	0.4673	99.81	0.999988	0.437253	0.107643	0.454565	0.000526039	1.22241e-05	0.245938	0.617667	0.126122	0.0102723
	JS-Erz-14s	38	core	38.7	5.97	5.95	0.0918	27.63	21.94	0.051	0.3056	100.63	0.999997	0.649628	0.0708811	0.279488	2.50141e-08	2.74418e-06	0.230225	0.598051	0.16502	0.00670445
	JS-Erz-14s	46	core	36.7	1.9	2.17	0.0773	37.15	20.78	<0.028	0.8479	99.64	0.999676	0.040435	0.891533	0.0671817	0.000526039	0.000323844	0.0765514	0.841069	0.0629349	0.019445
	JS-Erz-14s	56	core	38.78	7.47	2.97	<0.024	28.99	21.84	<0.027	0.6608	100.72	0.999959	0.264038	0.136106	0.599289	0.000526039	4.05299e-05	0.284556	0.619902	0.0812309	0.0143105
	JS-Erz-14s	57	core	38.25	5.74	3.05	<0.024	31.15	21.67	<0.027	0.3691	100.25	0.999989	0.405377	0.165064	0.429022	0.000526039	1.09117e-05	0.224207	0.682137	0.0854758	0.0081803
	JS-Erz-14s	59	core	38.41	5.24	7.18	0.0263	27.23	21.51	<0.028	0.5115	100.1	0.99999	0.536746	0.117028	0.34569	0.000526039	1.01277e-05	0.201696	0.588391	0.19872	0.0111925
	JS-Erz-14s	60	core	38.64	5.96	6.73	0.0659	26.31	21.58	<0.027	0.4993	99.81	0.999988	0.525484	0.0873941	0.38711	1.50905e-08	1.22348e-05	0.230671	0.571343	0.187003	0.0109835
	JS-Erz-14s	61	core	38.93	8.39	2.02	<0.023	28.52	21.95	<0.027	0.4287	100.24	0.999961	0.278353	0.0947284	0.626353	0.000526039	3.91753e-05	0.321667	0.613333	0.0556667	0.00933333
	JS-Erz-14s	62	core	37.13	2.05	2.37	0.0832	36.35	20.86	<0.028	0.8753	99.74	0.99959	0.0510464	0.855205	0.0933382	4.04812e-11	0.00041034	0.0831206	0.827512	0.0691832	0.020184
	JS-Erz-14s	64	core	38.87	7.28	3.7	0.0526	28.23	22.07	<0.027	0.4718	100.67	0.999989	0.418222	0.107135	0.474105	0.000526039	1.10093e-05	0.279551	0.608061	0.102095	0.0102931
	JS-Erz-14s	65	mantle	37.92	3.48	9.66	0.1306	26.29	21.47	<0.027	0.5014	99.45	0.999993	0.619533	0.202638	0.177296	0.000526039	7.18458e-06	0.136513	0.579596	0.272692	0.0111981
	JS-Erz-14s	66	core	36.91	0.6811	6.94	0.0996	32	20.84	0.0508	2	99.53	0.998198	0.00900599	0.984722	0.00446975	6.14619e-13	0.00180192	0.0275113	0.72507	0.201538	0.04588
	JS-Erz-14s	69	core	37.51	3.7	4.37	0.0402	31.86	21.38	<0.027	0.8956	99.75	0.999967	0.219204	0.523461	0.256776	0.000526039	3.2596e-05	0.14674	0.708688	0.124396	0.0201768
	JS-Erz-14s	70	core	37.69	1.3195	10.51	0.1267	28.75	21.02	<0.028	0.7379	100.17	0.9999	0.208876	0.738901	0.0515971	0.000526039	9.96533e-05	0.0519046	0.634316	0.297284	0.0164955
	JS-Erz-14s	73	mantle	37.86	2.03	11.93	0.1577	25.99	21.1	<0.028	0.8448	99.94	0.999931	0.369289	0.512663	0.117452	0.000526039	6.93722e-05	0.0791909	0.56803	0.334087	0.0186924
	JS-Erz-14s	76	mantle	39.17	6.06	9.7	0.0465	23.03	22.07	<0.027	0.5484	100.63	0.999992	0.653859	0.0670433	0.278563	0.000526039	8.35353e-06	0.230531	0.492066	0.265535	0.0118682
	JS-Erz-14s	77	mantle	38.04	5.48	4.4	0.1851	30.02	21.64	0.0511	0.6254	100.45	0.999988	0.372655	0.223419	0.403913	7.17729e-08	1.23605e-05	0.212096	0.651698	0.122452	0.0137531
	JS-Erz-14s	78	core	39.15	7.36	7.92	0.06	23.17	21.99	<0.027	0.5944	100.25	0.999988	0.560676	0.0562073	0.382579	0.000526039	1.18475e-05	0.278976	0.492603	0.215617	0.0128044
	JS-Erz-14s	79	core	38.75	7.15	3.31	0.0369	28.66	21.96	<0.027	0.5253	100.39	0.999982	0.357601	0.128109	0.513746	0.000526039	1.78985e-05	0.27597	0.620683	0.0918229	0.0115239
	JS-Erz-14s	81	core	37.16	1.9	2.43	0.0883	37.51	20.87	<0.028	0.3563	100.32	0.999923	0.140798	0.750649	0.10795	0.000526039	7.72646e-05	0.0762073	0.845618	0.0700374	0.00813767
	JS-Erz-14s	85	core	37.22	1.84	2.69	0.0648	37.3	21.13	<0.028	0.2931	100.55	0.999971	0.183967	0.729055	0.0869488	2.00534e-12	2.91639e-05	0.0740245	0.841568	0.0777089	0.00669905
	JS-Erz-14s	87	core	37.57	1.83	9.62	0.0726	28.28	21.16	<0.028	1.7	100.23	0.999802	0.112731	0.815621	0.0709233	0.000526039	0.000198214	0.071511	0.620201	0.270391	0.0378975
	JS-Erz-14s	88	core	38.46	7	2.22	0.0245	30.34	21.75	<0.027	0.3917	100.19	0.999978	0.31831	0.133929	0.547213	0.000526039	2.24847e-05	0.271076	0.658541	0.0617746	0.00860849
	JS-Erz-14s	89	core	38.87	8.02	3.12	0.0396	28.03	21.91	<0.026	0.3541	100.36	0.999988	0.418367	0.0683952	0.513226	5.68841e-08	1.16419e-05	0.306361	0.600435	0.0855155	0.00768809
	JS-Erz-14s	94	core	37.01	1.87	0.917	0.0865	37.93	21.04	<0.028	1.37	100.23	0.994951	0.00713522	0.950783	0.0365089	0.000526039	0.0050467	0.0759093	0.865635	0.0268123	0.0316429
	JS-Erz-14s	96	core	38.25	5.78	4.1	0.0626	29.65	21.68	0.054	0.8448	100.42	0.99997	0.28377	0.249276	0.466924	2.14367e-07	2.95932e-05	0.223775	0.643603	0.114046	0.018576
	JS-Erz-14s	97	core	39.29	5.91	13.65	0.049	18.52	22.28	<0.027	0.3553	100.07	0.999996	0.852058	0.0241528	0.123259	0.000526039	3.93701e-06	0.224695	0.394761	0.372876	0.00766802
	JS-Erz-14s	101	core	38.38	5.39	7.98	0.1901	26.17	21.35	0.0362	0.4911	99.99	0.999989	0.563213	0.0880768	0.348699	1.4878e-08	1.12355e-05	0.206428	0.562942	0.219938	0.0106921
	JS-Erz-14s	103	core	37.29	1.176	5.01	0.0545	33.52	20.96	<0.028	2.16	100.18	0.998404	0.0145718	0.965319	0.0179879	0.000526039	0.0015956	0.0474036	0.758056	0.14511	0.0494311
	JS-Erz-14s	104	core	38.26	5.07	9.37	0.1268	24.71	21.68	<0.027	0.4233	99.63	0.999996	0.700384	0.0825316	0.216554	0.000526039	3.74081e-06	0.195789	0.53498	0.259947	0.00928382
	JS-Erz-14s	107	core	36.99	1.5644	3.11	0.0774	37.25	20.61	<0.028	0.1997	99.81	0.999968	0.268658	0.635744	0.0950407	0.000526039	3.14943e-05	0.0630452	0.842154	0.0902308	0.0045697
	JS-Erz-14s	112	core	37.6	3.5	2.2	0.0761	35.28	21.3	<0.028	0.3348	100.3	0.999974	0.274174	0.443505	0.281769	0.000526039	2.58782e-05	0.139809	0.789566	0.0630312	0.00759392
	JS-Erz-14s	113	core	37.2	3.46	0.512	0.057	37.64	21	0.0294	0.5017	100.4	0.998567	0.0395435	0.713835	0.245188	1.7215e-09	0.00143277	0.137247	0.836875	0.0145845	0.0112939
	JS-Erz-14s	114	core	39.35	8.95	6.66	0.0673	22.38	22.14	<0.027	0.5303	100.08	0.999989	0.541603	0.037136	0.420724	0.000526039	1.12666e-05	0.336403	0.472223	0.180044	0.0113294
	JS-Erz-14s	117	core	37.13	2.52	2.32	0.0702	36.36	21.11	<0.028	0.459	99.99	0.999948	0.146938	0.70598	0.14703	5.76828e-11	5.20539e-05	0.101428	0.821129	0.066949	0.0104943
	JS-Erz-14s	119	core	37.13	1.74	2.84	0.1246	36.09	20.69	0.0581	1.67	100.33	0.998227	0.0204526	0.920419	0.0573555	2.58932e-10	0.0017733	0.0697095	0.810622	0.0816598	0.0380083
	JS-Erz-14s	120	core	37.15	2.99	1.1279	0.0712	37.3	20.88	<0.027	0.2159	99.75	0.999921	0.199447	0.530108	0.269841	0.000526039	7.87811e-05	0.120472	0.841968	0.0326208	0.00493901
	JS-Erz-14s	121	core	38.45	5.76	5.35	<0.023	28.45	21.96	<0.027	0.5067	100.5	0.999994	0.505972	0.151684	0.341812	0.000526039	5.6413e-06	0.22273	0.617471	0.148654	0.0111448
	JS-Erz-14s	123	core	37.18	1.84	2.21	0.0713	37.65	20.8	<0.028	0.1671	99.96	0.999969	0.284653	0.591817	0.123499	5.23881e-13	3.08101e-05	0.0745229	0.857013	0.0646201	0.00384364
	JS-Erz-14s	129	core	38.63	6.36	7.26	0.0934	25.36	21.6	0.0292	0.4266	99.76	0.999992	0.59054	0.0599885	0.349464	2.6569e-08	7.63224e-06	0.244113	0.546229	0.200361	0.00929716
	JS-Erz-14s	130	core	37.29	1.94	3.2	0.0386	35.91	21.09	<0.028	0.8893	100.35	0.999813	0.0633742	0.860391	0.0755221	0.000526039	0.000186627	0.0778334	0.809467	0.0923958	0.0203036
	JS-Erz-14s	133	core	37.23	3.3	0.8127	<0.024	36.97	21.27	<0.028	0.4976	100.1	0.99967	0.0630073	0.737043	0.199094	0.000526039	0.000329643	0.132601	0.832608	0.0234396	0.0113515
	JS-Erz-14s	134	core	37.76	2.87	7.19	0.0383	30.14	21.36	<0.028	0.7117	100.08	0.999979	0.345775	0.4729	0.180778	0.000526039	2.09236e-05	0.112987	0.667089	0.203976	0.0159481
	JS-Erz-14s	136	core	37.2	3.48	0.5045	0.0657	37.65	21.17	<0.028	0.1323	100.21	0.999909	0.186869	0.508898	0.303616	0.000526039	9.14334e-05	0.138979	0.84354	0.0144812	0.00299955
	JS-Erz-14s	146	core	38.83	6.02	8.56	0.0712	24.55	21.75	<0.027	0.5212	100.31	0.999991	0.600512	0.071743	0.32721	0.000526039	9.28594e-06	0.229387	0.524974	0.234352	0.0112873
	JS-Erz-14s	149	core	39.24	6.18	13.08	0.1095	19.11	22.01	0.0401	0.4164	100.18	0.999993	0.794421	0.0271776	0.178394	5.90678e-08	7.35879e-06	0.233039	0.403846	0.354193	0.00892103
	JS-Erz-14s	154	core	36.99	1.91	2.25	0.0961	36.74	20.77	<0.028	1.1431	99.92	0.999179	0.0295177	0.899553	0.0701082	5.59453e-11	0.000820923	0.0768564	0.83175	0.0651862	0.0262079
	JS-Erz-14s	155	core	38.33	7.86	1.4	<0.024	29.79	21.76	<0.027	0.5403	99.68	0.999913	0.183663	0.168827	0.646898	0.000526039	8.67474e-05	0.303543	0.64559	0.0390009	0.0118662
	JS-Erz-14s	156	core	38.54	7.56	2.78	<0.023	29.19	21.91	<0.027	0.3924	100.39	0.999989	0.386787	0.104524	0.508153	0.000526039	1.09377e-05	0.289093	0.625982	0.0764078	0.00851732
	JS-Erz-14s	157	core	37.27	2.09	2.19	0.0731	37.43	20.95	<0.028	0.5518	100.57	0.99982	0.0844859	0.802771	0.112038	0.000526039	0.000179875	0.0838291	0.840625	0.0629969	0.0125494
	JS-Erz-14s	158	core	37.07	2.86	0.4845	0.0665	37.67	20.87	<0.027	0.6925	99.74	0.995312	0.0188894	0.827294	0.149128	5.6238e-10	0.00468819	0.115456	0.854542	0.014089	0.0159129
	JS-Erz-14s	162	core	37.31	2.23	5.21	0.1753	33.8	21.14	<0.028	0.3707	100.27	0.999989	0.349785	0.526923	0.123281	8.96022e-12	1.11777e-05	0.0887254	0.753916	0.148985	0.00837315
	JS-Erz-14s	164	mantle	37.22	0.6466	6.18	0.0756	31.81	20.83	0.0299	3.62	100.42	0.987541	0.00314925	0.981155	0.00323614	5.33431e-13	0.0124592	0.0258747	0.714214	0.177597	0.0823134
	JS-Erz-14s	168	core	37.15	2.09	2.52	0.053	36	20.92	<0.029	1.4	100.16	0.999243	0.0300797	0.891754	0.0774101	1.12024e-10	0.000756556	0.084028	0.81127	0.0726909	0.0320107
	JS-Erz-14s	169	core	37.18	1.1512	5.07	0.097	35.14	20.7	<0.028	1.2746	100.61	0.99926	0.029152	0.942751	0.0268315	0.000526039	0.000739818	0.0456252	0.781229	0.144452	0.0286928
	JS-Erz-14s	170	core	37.52	0.6985	7.76	0.1731	31.72	20.96	0.031	1.71	100.58	0.998127	0.0143467	0.97725	0.00652958	1.54847e-13	0.00187331	0.0278868	0.710622	0.222727	0.0387642
	JS-Erz-14s	171	core	36.95	1.4718	5.43	0.0829	33.28	21.02	<0.028	1.39	99.64	0.999786	0.0426632	0.924072	0.0325254	0.000526039	0.000213809	0.0592672	0.751852	0.157178	0.0317026
	JS-Erz-14s	173	core	38.48	5.41	5.76	0.032	28.46	21.68	<0.028	0.5927	100.41	0.999987	0.447423	0.16268	0.389358	0.000526039	1.31233e-05	0.209273	0.617504	0.160198	0.0130255
	JS-Erz-14s	174	core	37.19	0.7164	7.73	0.038	25	20.87	<0.028	8.52	100.06	0.924987	0.00191795	0.919774	0.00280908	0.000526039	0.0749732	0.0284901	0.55789	0.221038	0.192581
	JS-Erz-14s	175	core	37.09	1.4811	2.99	0.0767	35.97	20.86	<0.028	1.79	100.25	0.998364	0.0143275	0.952816	0.0306954	0.000526039	0.00163532	0.0596636	0.812867	0.0864255	0.0410438
	JS-Erz-14s	178	core	38.44	6.91	2.07	<0.024	30.69	21.84	<0.027	0.3262	100.28	0.999985	0.355745	0.133037	0.510677	0.000526039	1.49912e-05	0.267796	0.667323	0.0576946	0.00718681
	JS-Erz-14s	180	core	38.24	3.35	7.82	0.0363	28.67	21.47	<0.027	0.8396	100.44	0.999967	0.368015	0.385123	0.246303	0.000526039	3.32236e-05	0.131098	0.629937	0.220278	0.0186877
	JS-Erz-14s	181	core	37.8	2.71	6.53	0.0588	31.56	21.07	<0.028	0.3402	100.08	0.999988	0.511786	0.297953	0.189723	0.000526039	1.20575e-05	0.107174	0.699629	0.185558	0.00763867
	JS-Erz-14s	185	core	38.67	8.31	3.62	0.0649	26.77	22.04	<0.027	0.5169	99.98	0.999989	0.404817	0.0886028	0.506043	0.000526039	1.10624e-05	0.316892	0.572627	0.0992774	0.0112039
	JS-Erz-14s	187	core	38.08	4.76	6.5	0.0247	28.39	21.56	<0.027	0.6683	99.99	0.999988	0.448674	0.219535	0.331254	0.000526039	1.18581e-05	0.184909	0.618905	0.181426	0.0147595
	JS-Erz-14s	192	core	38.24	4.38	4.4	<0.024	31.48	21.54	<0.027	0.3812	100.46	0.99999	0.461778	0.211879	0.325807	0.000526039	1.01074e-05	0.172373	0.694691	0.124417	0.00851806
	JS-Erz-14s	194	core	36.89	0.9023	4.65	0.1231	32.79	20.58	<0.028	3.88	99.81	0.98668	0.00371934	0.974812	0.00763026	0.000526039	0.0133126	0.0363124	0.740507	0.134472	0.0887083
	JS-Erz-14s	195	core	38.25	6.31	3.4	0.0701	29.9	21.53	0.0329	0.5592	100.06	0.999976	0.321035	0.159573	0.519368	6.40837e-08	2.4113e-05	0.244234	0.64886	0.0946116	0.0122945
	JS-Erz-14s	196	core	36.93	0.702	5.86	0.0726	35.56	20.63	<0.028	0.3423	100.12	0.9999	0.0838928	0.902289	0.0131916	0.000526039	0.000100371	0.0280132	0.796043	0.168178	0.00776587
	JS-Erz-14s	201	core	38.27	3.61	7.64	0.0348	28.5	21.64	<0.028	0.8682	100.57	0.999976	0.375026	0.376995	0.247429	0.000526039	2.42407e-05	0.141224	0.624728	0.214761	0.0192867
	JS-Erz-14s	203	mantle	37.32	1.1521	9.4	0.0895	27.52	21.05	<0.028	3.1	99.64	0.998401	0.022932	0.958162	0.0167817	0.000526039	0.00159805	0.0458841	0.614893	0.269016	0.070207
	JS-Erz-14s	206	core	38.11	3	9.77	0.0983	27.08	21.29	<0.027	0.7494	100.1	0.999968	0.450701	0.339332	0.209409	0.000526039	3.18683e-05	0.117138	0.592325	0.273929	0.0166083
	JS-Erz-14s	208	core	37.13	1.3346	5.25	0.0575	35.2	20.83	<0.028	0.4938	100.3	0.999936	0.133203	0.816458	0.0497492	0.000526039	6.35037e-05	0.0530935	0.785659	0.15009	0.0111576
	JS-Erz-14s	210	mantle	38.05	3.96	7.74	0.0364	27.87	21.38	<0.028	0.7399	99.78	0.999979	0.438306	0.269392	0.291756	0.000526039	2.07068e-05	0.154565	0.611444	0.217554	0.016437
	JS-Erz-14s	212	core	39.3	10.4	3	0.0325	24.79	22.52	<0.026	0.5913	100.65	0.999982	0.353962	0.0700756	0.575419	0.000526039	1.82847e-05	0.388143	0.518845	0.0804706	0.0125415
	JS-Erz-14s	214	core	37.22	1.1056	5.36	0.0775	35.22	20.91	<0.028	0.3943	100.29	0.999944	0.133509	0.832695	0.0332143	0.000526039	5.58571e-05	0.0443267	0.792215	0.154477	0.00898199
	JS-Erz-14s	215	core	39.07	5.2	14.7	0.11	18.5	21.87	<0.027	0.4837	99.97	0.999987	0.798946	0.0388197	0.162222	1.1727e-08	1.28091e-05	0.19686	0.392893	0.399841	0.0104055
	JS-Erz-14s	216	core	38.74	9.01	3.69	0.0392	26.08	22.04	0.0416	0.3516	99.99	0.999994	0.495339	0.0493591	0.455295	5.98517e-07	5.58552e-06	0.340258	0.552117	0.100086	0.00753934
	JS-Erz-14s	220	core	39.28	6.94	9.9	0.1158	21.5	21.97	0.0485	0.4571	100.21	0.999991	0.683738	0.0351551	0.281098	1.7377e-07	8.65871e-06	0.263132	0.457237	0.269785	0.00984665
	JS-Erz-14s	221	core	38.32	4.91	6.27	0.0397	29.25	21.69	<0.027	0.4159	100.92	0.999995	0.564482	0.142465	0.293049	2.56093e-09	4.71876e-06	0.188215	0.629695	0.173026	0.00906404
	JS-Erz-14s	224	core	37.86	3.04	9.67	0.0719	27.08	21.28	<0.027	0.813	99.85	0.999973	0.429294	0.370031	0.200649	4.42072e-10	2.67274e-05	0.118699	0.592339	0.270958	0.0180033
	JS-Erz-14s	231	core	36.72	0.7711	2.8	0.0364	38.43	20.69	<0.028	0.5956	100.04	0.999404	0.0172152	0.972757	0.00890636	0.000526039	0.000595813	0.0312261	0.873433	0.0816401	0.0137009
	JS-Erz-14s	232	core	38.58	7.22	3.08	0.0255	28.74	21.89	<0.027	0.4601	100	0.999985	0.373773	0.119166	0.50652	0.000526039	1.48449e-05	0.279524	0.624582	0.085763	0.0101311
	JS-Erz-14s	236	core	38.75	7.2	9.37	0.1363	22.06	21.81	<0.027	0.4051	99.74	0.999996	0.701248	0.0322324	0.26599	0.000526039	4.43598e-06	0.271299	0.46628	0.253738	0.00868224
	JS-Erz-14s	238	mantle	38.77	7.93	3.39	0.0434	27.94	21.82	<0.027	0.3827	100.28	0.999988	0.41401	0.0692984	0.516154	0.000526039	1.19816e-05	0.301978	0.59685	0.092891	0.00828085
	JS-Erz-14s	240	core	36.98	0.7386	4.8	0.1148	35.16	20.85	<0.028	1.0994	99.74	0.999144	0.014079	0.977768	0.006771	0.000526039	0.000855649	0.0301079	0.803887	0.140537	0.0254682
	JS-Erz-14s	241	core	37.95	3.79	7.44	0.0753	28.49	21.09	0.0604	0.5934	99.49	0.999976	0.460922	0.229038	0.310015	4.81971e-09	2.40189e-05	0.148845	0.627772	0.210143	0.0132399
	JS-Erz-14s	242	core	38.58	5.64	9.11	0.1153	24.43	21.82	<0.027	0.3795	100.08	0.999997	0.71596	0.0591104	0.224401	0.000526039	3.24901e-06	0.216022	0.524885	0.250837	0.00825624
	coesite-bearing garnets
	JS-Erz-3s	16	core	38.38	5.82	8.97	0.1182	24.04	21.8	<0.026	0.4693	99.61	0.999996	0.678345	0.0728871	0.248238	0.000526039	3.99961e-06	0.223611	0.518499	0.247646	0.010244
	JS-Erz-3s	16	mantle x	38.83	5.73	9.19	0.096	24.22	22.06	<0.026	0.4881	100.63	0.999996	0.677333	0.0782253	0.243912	0.000526039	4.35904e-06	0.218834	0.518483	0.252091	0.0105925
	JS-Erz-3s	16	mantle x'	38.65	5.99	8.68	0.1017	24.48	21.8	<0.026	0.4619	100.19	0.999995	0.652492	0.0669301	0.280573	1.61745e-08	5.23784e-06	0.228652	0.523601	0.237745	0.0100025
	JS-Erz-3s	16	rim x	39.25	5.95	8.73	0.0706	24.57	22.19	<0.026	0.4649	101.23	0.999995	0.663141	0.0704237	0.265904	0.000526039	5.26046e-06	0.226392	0.524794	0.238756	0.0100581
	JS-Erz-3s	16	rim x'	38.4	6.21	8.41	0.0471	24.4	21.62	<0.026	0.486	99.59	0.999994	0.624041	0.0657827	0.309645	0.000526039	6.04411e-06	0.236683	0.522181	0.230601	0.0105357
	JS-Erz-3s	16	mantle y	38.78	5.9	9.03	0.1136	24.23	21.94	<0.026	0.4446	100.45	0.999996	0.682234	0.0650511	0.252184	0.000526039	4.31082e-06	0.224963	0.518062	0.247343	0.0096318
	JS-Erz-3s	16	mantle y'	38.75	5.77	9.25	0.114	23.83	21.8	<0.026	0.4659	100	0.999994	0.667331	0.0654726	0.26719	1.26911e-08	6.42575e-06	0.221424	0.513217	0.255195	0.0101645
	JS-Erz-3s	16	rim y	38.36	6.01	8.64	0.1035	24.47	21.92	<0.027	0.471	99.97	0.999997	0.678794	0.0763055	0.244372	0.000526039	2.88423e-06	0.229263	0.523677	0.23685	0.0102096
	JS-Erz-3s	16	rim y'	38.83	5.98	8.73	0.0881	24.48	22.12	<0.027	0.4551	100.69	0.999997	0.684955	0.0720736	0.242442	0.000526039	3.35216e-06	0.227896	0.52323	0.239025	0.00985001
	JS-Erz-3s	20	core	38.63	6.22	8.71	0.0879	24.11	22.09	<0.026	0.3976	100.26	0.999998	0.723425	0.0578888	0.218158	0.000526039	2.13298e-06	0.237069	0.515749	0.238561	0.00862069
	JS-Erz-3s	20	mantle x	38.68	6.26	8.64	0.1139	24.16	21.97	0.0356	0.4335	100.29	0.999997	0.686124	0.0602125	0.25366	4.51737e-08	3.39319e-06	0.238182	0.515923	0.236527	0.00936838
	JS-Erz-3s	20	mantle x'	38.79	6.33	8.8	0.1699	23.72	21.94	<0.027	0.4521	100.22	0.999995	0.673683	0.0573323	0.268454	0.000526039	4.61903e-06	0.241408	0.507388	0.241408	0.00979578
	JS-Erz-3s	20	rim x	38.94	6.05	8.46	0.1324	24.41	21.96	<0.026	0.4046	100.37	0.999995	0.679412	0.0578805	0.262702	1.0362e-08	4.64081e-06	0.232127	0.525586	0.233464	0.00882382
	JS-Erz-3s	20	rim x'	38.53	6.29	8.8	0.1811	23.21	21.8	<0.027	0.3892	99.2	0.999996	0.710423	0.0476533	0.241394	0.000526039	3.7176e-06	0.243271	0.503573	0.244607	0.00854872
	JS-Erz-3s	20	mantle y	38.66	6.21	8.67	0.1204	24.04	21.94	0.0282	0.4194	100.09	0.999997	0.693382	0.0579548	0.248659	2.60715e-08	3.41451e-06	0.237396	0.515437	0.23806	0.00910765
	JS-Erz-3s	20	mantle y'	38.89	6.15	8.76	0.1076	23.67	21.8	<0.026	0.4026	99.8	0.999994	0.676358	0.0492385	0.273871	0.000526039	6.16723e-06	0.236889	0.511727	0.242573	0.0088102
	JS-Erz-3s	20	rim y	38.29	6.19	8.46	0.1853	24.14	21.55	0.0269	0.4644	99.31	0.999994	0.6374	0.0616858	0.300909	2.78578e-08	5.79602e-06	0.2372	0.519431	0.233241	0.010128
	JS-Erz-3s	20	rim y'	39.07	6.19	8.53	0.1091	23.89	22.19	<0.027	0.3989	100.39	0.999996	0.708253	0.0562113	0.235533	1.64035e-08	3.51691e-06	0.238476	0.516501	0.236288	0.00873458
	JS-Erz-3s	34	core	38.72	5.75	7.79	0.0995	25.75	21.92	<0.027	0.4079	100.46	0.999996	0.657518	0.0761274	0.266351	6.64589e-09	3.95003e-06	0.220948	0.555037	0.215116	0.00889792
	JS-Erz-3s	34	mantle x	38.74	5.6	7.9	0.1162	25.48	21.95	<0.027	0.3977	100.19	0.999996	0.672397	0.0767372	0.250336	0.000526039	3.91203e-06	0.21688	0.554119	0.220238	0.00876251
	JS-Erz-3s	34	mantle x'	38.58	6.01	7.59	0.1108	25.7	21.85	<0.027	0.4354	100.27	0.999996	0.634283	0.0764015	0.288786	0.000526039	4.1736e-06	0.229988	0.551772	0.208779	0.00946132
	JS-Erz-3s	34	rim x	39.21	5.71	7.94	0.0714	25.37	22.06	<0.027	0.4076	100.78	0.999994	0.653398	0.0710594	0.275011	0.000526039	5.95565e-06	0.220495	0.54989	0.220664	0.0089513
	JS-Erz-3s	34	rim x'	38.07	5.68	7.53	0.1069	26.09	21.63	0.0298	0.4352	99.57	0.999997	0.635299	0.0892948	0.275403	1.65117e-08	3.47223e-06	0.218549	0.563445	0.208488	0.00951721
	JS-Erz-3s	34	mantle y	38.75	5.93	7.61	0.0915	25.53	22.02	0.0449	0.415	100.39	0.999996	0.659737	0.0763626	0.263897	4.02853e-08	3.59145e-06	0.228546	0.55172	0.210657	0.00907829
	JS-Erz-3s	34	mantle y'	38.62	5.37	8.16	0.1093	25.78	21.99	<0.027	0.4272	100.46	0.999997	0.671438	0.0925227	0.23551	0.000526039	3.31846e-06	0.206914	0.557615	0.226119	0.00935204
	JS-Erz-3s	34	rim y	38.54	6.07	7.65	0.0747	25.46	21.86	0.036	0.372	100.08	0.999997	0.678404	0.0627483	0.258845	2.51369e-08	2.93529e-06	0.232994	0.547968	0.210923	0.00811497
	JS-Erz-3s	34	rim y'	39.34	5.25	8.06	0.1457	25.69	22.1	<0.027	0.4311	101.01	0.999992	0.640839	0.0883119	0.270316	0.000526039	7.75516e-06	0.204279	0.560663	0.225523	0.00953417
	JS-Erz-3s	52	core	38.84	6.52	10.44	0.1874	21.66	21.97	<0.026	0.4268	100.05	0.999996	0.739276	0.03893	0.221264	0.000526039	4.08572e-06	0.246881	0.460051	0.283897	0.00917128
	JS-Erz-3s	52	mantle x	39.17	6.61	10.01	0.1602	21.94	22.05	<0.026	0.4009	100.35	0.999995	0.729711	0.0357776	0.233981	0.000526039	4.87229e-06	0.251082	0.467221	0.273045	0.00865225
	JS-Erz-3s	52	mantle x'	38.75	6.64	10.59	0.2181	21.52	21.71	<0.026	0.3889	99.82	0.999995	0.733037	0.0301959	0.236236	0.000526039	5.00615e-06	0.250012	0.454911	0.28676	0.00831734
	JS-Erz-3s	52	rim x	39.23	6.56	9.48	0.1722	22.15	22.18	<0.027	0.4401	100.21	0.999995	0.711673	0.0448547	0.242941	0.000526039	5.30714e-06	0.251846	0.477112	0.261436	0.00960616
	JS-Erz-3s	52	rim x'	38.58	6.69	10.63	0.1766	21.54	21.67	<0.026	0.4184	99.72	0.999995	0.724218	0.0330118	0.24224	0.000526039	4.79512e-06	0.250909	0.453397	0.286776	0.00891795
	JS-Erz-3s	52	mantle y	38.85	6.61	10.36	0.1968	21.92	21.84	<0.026	0.4238	100.21	0.999995	0.718712	0.0363446	0.244413	0.000526039	4.98155e-06	0.248559	0.462314	0.280081	0.00904599
	JS-Erz-3s	52	mantle y'	38.82	6.68	10.11	0.1769	21.82	22.05	<0.026	0.4264	100.08	0.999997	0.740668	0.0398775	0.218925	0.000526039	3.35064e-06	0.252706	0.463102	0.275019	0.0091728
	JS-Erz-3s	52	rim y	38.89	6.62	10.02	0.1707	22.34	21.86	<0.026	0.4298	100.33	0.999995	0.704864	0.038822	0.255783	0.000526039	5.09431e-06	0.248731	0.47134	0.270745	0.00918366
	JS-Erz-3s	52	rim y'	39.23	6.69	9.45	0.1471	22.48	22.12	<0.026	0.4337	100.56	0.999995	0.701226	0.0421942	0.256049	0.000526039	5.25594e-06	0.253996	0.478825	0.257829	0.00934984
	JS-Erz-3s	62	core	39.04	6.27	9.29	0.1721	23.31	21.75	<0.026	0.4665	100.31	0.99999	0.641042	0.0492564	0.309692	1.9122e-08	9.82881e-06	0.238522	0.497446	0.253948	0.0100849
	JS-Erz-3s	62	mantle x	38.97	6.28	9.23	0.2003	23.3	21.76	<0.026	0.4997	100.24	0.99999	0.629847	0.0542999	0.315317	0.000526039	1.00715e-05	0.239043	0.497661	0.25248	0.0108158
	JS-Erz-3s	62	mantle x'	38.78	6.35	9.05	0.1544	23.41	21.54	<0.027	0.5218	99.83	0.999987	0.593856	0.0535494	0.352056	0.000526039	1.33174e-05	0.241739	0.499637	0.247345	0.0112789
	JS-Erz-3s	62	rim x	39.07	6.31	9.04	0.1844	23.63	21.95	<0.026	0.4821	100.68	0.999993	0.64913	0.05686	0.293477	0.000526039	7.11112e-06	0.239677	0.503272	0.246653	0.0103976
	JS-Erz-3s	62	rim x'	38.44	6.43	9.08	0.1595	23.58	21.38	<0.026	0.4951	99.58	0.99999	0.604743	0.0499584	0.345289	2.8255e-08	9.97138e-06	0.242856	0.499902	0.246608	0.0106341
	JS-Erz-3s	62	mantle y	38.86	6.37	8.7	0.1472	23.92	21.75	0.0278	0.4746	100.26	0.999992	0.627041	0.0551036	0.317848	3.19245e-08	7.96331e-06	0.242149	0.509917	0.237686	0.0102479
	JS-Erz-3s	62	mantle y'	38.73	6.24	9.28	0.2066	23.39	21.84	<0.026	0.4639	100.16	0.999995	0.674512	0.0554537	0.269503	0.000526039	5.31182e-06	0.237158	0.499123	0.253696	0.0100222
	JS-Erz-3s	62	rim y	38.78	6.48	8.14	0.1022	24.32	21.95	<0.026	0.5028	100.28	0.999994	0.626081	0.0679627	0.305425	0.000526039	5.51186e-06	0.24674	0.519496	0.222878	0.010887
	JS-Erz-3s	62	rim y'	39.12	6.46	8.7	0.1407	23.87	21.78	<0.027	0.5084	100.57	0.999988	0.59526	0.0546705	0.349532	0.000526039	1.17907e-05	0.244698	0.507442	0.236917	0.0109435
	JS-Erz-3s	73	core	38.46	4.89	9.1	0.1498	25.38	21.76	0.0322	0.4453	100.22	0.999995	0.674194	0.0981246	0.227677	6.36094e-09	4.62075e-06	0.188664	0.549187	0.252383	0.00976592
	JS-Erz-3s	73	mantle x	38.64	4.66	9.07	0.0983	25.48	21.77	<0.026	0.4177	100.15	0.999994	0.679512	0.0977697	0.222713	1.82667e-09	5.59975e-06	0.181282	0.556087	0.253392	0.00924016
	JS-Erz-3s	73	mantle x'	38.17	5	8.69	0.096	25.59	21.7	<0.026	0.4759	99.75	0.999996	0.654362	0.110026	0.235607	4.93601e-09	4.07704e-06	0.19327	0.554782	0.241505	0.0104426
	JS-Erz-3s	73	rim x	38.99	4.87	8.89	0.1236	25.3	22.12	<0.027	0.4574	100.76	0.999995	0.673163	0.106672	0.219634	0.000526039	5.15143e-06	0.18935	0.552143	0.248405	0.010102
	JS-Erz-3s	73	rim x'	38.06	5.1	8.48	0.1065	25.83	21.59	<0.027	0.4154	99.6	0.999997	0.673001	0.0922712	0.234198	0.000526039	3.3478e-06	0.196926	0.558921	0.235057	0.00909526
	JS-Erz-3s	73	mantle y	38.49	4.87	9.09	0.0989	25.59	21.71	<0.027	0.4579	100.31	0.999995	0.657887	0.100343	0.241239	0.000526039	5.44371e-06	0.187159	0.551697	0.251148	0.00999619
	JS-Erz-3s	73	mantle y'	38.55	4.82	9.16	0.114	25.38	21.7	<0.027	0.4668	100.19	0.999993	0.653049	0.101232	0.245187	0.000526039	6.51265e-06	0.186039	0.54963	0.254098	0.0102338
	JS-Erz-3s	73	rim y	38.21	4.89	8.89	0.1019	25.6	21.63	<0.027	0.4488	99.78	0.999996	0.663789	0.101967	0.233714	0.000526039	4.41724e-06	0.188685	0.554626	0.246832	0.00985671
	JS-Erz-3s	73	rim y'	38.89	4.76	9.06	0.077	25.1	21.77	<0.026	0.4731	100.14	0.99999	0.640124	0.10049	0.258849	0.000526039	1.01543e-05	0.18586	0.549653	0.253997	0.0104905
	JS-Erz-3s	92	core	39.27	7.12	10.31	0.15	20.86	22.37	<0.026	0.4561	100.54	0.999996	0.747627	0.0364221	0.215421	0.000526039	3.79763e-06	0.268866	0.441673	0.279688	0.00977242
	JS-Erz-3s	92	mantle x	39.28	7.21	9.94	0.1263	20.9	22.15	<0.026	0.4418	100.04	0.999994	0.718301	0.0324508	0.248716	0.000526039	5.95669e-06	0.27381	0.445338	0.271307	0.00954415
	JS-Erz-3s	92	mantle x'	39.27	7.47	9.73	0.1041	20.93	22.27	<0.026	0.4248	100.23	0.999996	0.733996	0.0309463	0.234528	0.000526039	4.18779e-06	0.282347	0.443997	0.264534	0.00912299
	JS-Erz-3s	92	rim x	39.65	7.37	9.42	0.1097	21.26	22.36	<0.026	0.488	100.66	0.999992	0.684746	0.0375393	0.277181	0.000526039	7.64185e-06	0.279779	0.452752	0.25694	0.0105295
	JS-Erz-3s	92	rim x'	38.9	7.79	8.78	0.1222	21.69	21.95	0.0273	0.4577	99.72	0.999994	0.667801	0.0336171	0.298576	1.61423e-07	5.52075e-06	0.293764	0.458522	0.237911	0.00980311
	JS-Erz-3s	92	mantle y	39.18	7.41	9.72	0.115	20.98	22.33	<0.026	0.4352	100.2	0.999997	0.742091	0.0339055	0.223474	0.000526039	3.46642e-06	0.28047	0.445688	0.264482	0.00936011
	JS-Erz-3s	92	mantle y'	39.43	7.33	10.07	0.134	21.08	22.26	<0.026	0.4344	100.75	0.999995	0.725266	0.0310961	0.243633	5.27294e-08	5.08204e-06	0.274984	0.44409	0.271665	0.00926018
	JS-Erz-3s	92	rim y	39.31	7.56	9.09	0.0918	21.44	22.16	0.029	0.4687	100.15	0.999993	0.67722	0.0351229	0.28765	1.45674e-07	6.72987e-06	0.286471	0.455788	0.247642	0.010099
	JS-Erz-3s	92	rim y'	39.81	7.56	9.33	0.0864	21.35	22.31	<0.026	0.4424	100.9	0.999992	0.681694	0.0304498	0.287322	0.000526039	8.30838e-06	0.285298	0.452057	0.253152	0.00949319
	JS-Erz-3s	96	core	39.51	7.28	12.05	0.1921	18.85	22.17	0.0305	0.3972	100.49	0.999993	0.781102	0.0197191	0.199172	1.00138e-07	6.55702e-06	0.272306	0.395464	0.323787	0.00844231
	JS-Erz-3s	96	mantle x	39.56	7.27	11.8	0.1797	19.04	22.26	0.048	0.4142	100.58	0.999994	0.776341	0.0220498	0.201603	2.54347e-07	6.33103e-06	0.272602	0.400592	0.31798	0.00882632
	JS-Erz-3s	96	mantle x'	39.46	7.43	11.47	0.1352	19.51	22.24	0.0543	0.357	100.65	0.999996	0.792675	0.0188166	0.188504	2.63669e-07	4.01252e-06	0.27709	0.408039	0.307309	0.007563
	JS-Erz-3s	96	rim x	39.48	7.27	11.16	0.1314	19.75	22.31	<0.026	0.4083	100.54	0.999995	0.77249	0.0247869	0.202718	6.88298e-08	4.7983e-06	0.273344	0.4165	0.301443	0.00871242
	JS-Erz-3s	96	rim x'	39.5	7.54	11.09	0.1546	19.7	22.11	0.0404	0.41	100.56	0.999993	0.742216	0.0213729	0.236404	2.02505e-07	7.09117e-06	0.281346	0.412443	0.297527	0.00868474
	JS-Erz-3s	96	mantle y	39.66	7.34	11.98	0.15	18.99	22.13	0.0358	0.3814	100.66	0.999992	0.771413	0.0178983	0.210681	1.1613e-07	7.74111e-06	0.273694	0.397228	0.320991	0.00808679
	JS-Erz-3s	96	mantle y'	39.55	7.4	11.69	0.1658	19.22	22.13	<0.026	0.3863	100.54	0.999993	0.768001	0.0189948	0.212472	0.000526039	6.73878e-06	0.276125	0.402208	0.313471	0.00819618
	JS-Erz-3s	96	rim y	39.37	7.42	11.76	0.1458	19.1	22.27	0.0402	0.405	100.52	0.999996	0.788525	0.0215808	0.18989	2.1878e-07	4.41718e-06	0.276733	0.399505	0.315182	0.00858086
	JS-Erz-3s	96	rim y'	39.62	7.52	10.95	0.1142	19.83	22.4	<0.026	0.4	100.84	0.999996	0.7709	0.0232205	0.205349	0.000526039	4.4524e-06	0.281246	0.415892	0.294362	0.00850046
	JS-Erz-3s	105	core	38.82	5.15	9.09	0.1148	25.31	22.05	<0.026	0.4472	101.01	0.999996	0.685149	0.092504	0.222343	3.92833e-09	3.83949e-06	0.196954	0.543373	0.249942	0.00973106
	JS-Erz-3s	105	mantle x	38.54	5.16	9.01	0.0972	25.25	21.84	<0.026	0.4474	100.35	0.999996	0.675995	0.0904612	0.233013	0.000526039	4.15556e-06	0.198082	0.543482	0.248681	0.0097548
	JS-Erz-3s	105	mantle x'	38.63	5.15	8.95	0.125	25.12	21.92	<0.027	0.4605	100.36	0.999996	0.672982	0.0949316	0.231556	0.000526039	4.39427e-06	0.198451	0.543446	0.248022	0.0100811
	JS-Erz-3s	105	rim x	38.82	5.16	8.67	0.092	25.28	22.07	<0.026	0.4644	100.58	0.999996	0.668559	0.100743	0.230693	5.82096e-09	4.43151e-06	0.199771	0.54891	0.241104	0.0102154
	JS-Erz-3s	105	rim x'	38.18	5.48	8.43	0.1029	25.65	21.69	<0.026	0.5067	100.06	0.999996	0.62924	0.100773	0.269457	0.000526039	4.18137e-06	0.208932	0.548836	0.231253	0.01098
	JS-Erz-3s	105	mantle y	38.7	5.08	9.2	0.1161	25.28	22	<0.027	0.449	100.82	0.999996	0.687589	0.0946949	0.217187	0.000526039	3.65594e-06	0.194389	0.542761	0.253089	0.00976105
	JS-Erz-3s	105	mantle y'	38.6	5.09	8.82	0.1025	25.39	21.8	<0.027	0.466	100.26	0.999994	0.652859	0.0967588	0.249851	0.000526039	5.54374e-06	0.196225	0.549198	0.244366	0.0102111
	JS-Erz-3s	105	rim y	38.64	4.92	9.44	0.1393	24.95	21.94	<0.027	0.4753	100.52	0.999995	0.680025	0.102228	0.217216	0.000526039	4.51383e-06	0.189513	0.539012	0.261081	0.0103932
	JS-Erz-3s	105	rim y'	38.78	5.43	8.38	0.0739	25.58	21.94	<0.026	0.4747	100.67	0.999995	0.639661	0.0933094	0.266498	0.000526039	5.25829e-06	0.20842	0.550349	0.230893	0.0103378
	JS-Erz-3s	110	core	38.69	5.94	8.9	0.1861	24.38	21.69	<0.026	0.4715	100.25	0.999993	0.637192	0.0640402	0.298235	0.000526039	7.02332e-06	0.225952	0.5204	0.243448	0.0102
	JS-Erz-3s	110	mantle x	38.73	5.82	8.83	0.1937	24.53	21.73	0.0336	0.4448	100.32	0.999994	0.651944	0.064046	0.284003	2.10505e-08	6.33141e-06	0.222395	0.525496	0.242447	0.00966144
	JS-Erz-3s	110	mantle x'	38.39	6.08	8.48	0.1757	24.46	21.39	<0.026	0.4646	99.46	0.999991	0.605178	0.0586742	0.335613	0.000526039	8.95273e-06	0.232436	0.524542	0.232929	0.010093
	JS-Erz-3s	110	rim x	38.84	6.11	8.28	0.1571	24.77	21.7	<0.027	0.4961	100.36	0.99999	0.593376	0.0667446	0.339344	0.000526039	9.59958e-06	0.232708	0.529635	0.226915	0.0107417
	JS-Erz-3s	110	rim x'	37.99	6.25	8.35	0.1406	24.52	21.5	<0.026	0.4844	99.24	0.999996	0.632719	0.068288	0.298462	0.000526039	4.31544e-06	0.237715	0.523396	0.228415	0.0104745
	JS-Erz-3s	110	mantle y	38.72	5.96	8.73	0.1913	24.42	21.58	<0.027	0.4785	100.09	0.99999	0.611204	0.0620959	0.326164	0.000526039	9.72749e-06	0.227408	0.522741	0.239472	0.0103788
	JS-Erz-3s	110	mantle y'	38.81	5.97	8.76	0.1412	24.45	21.71	<0.027	0.4611	100.31	0.999992	0.632446	0.0617093	0.305311	0.000526039	7.71442e-06	0.227487	0.522641	0.239895	0.00997634
	JS-Erz-3s	110	rim y	38.54	6.09	8.44	0.1727	24.52	21.79	<0.026	0.4692	100.03	0.999995	0.646735	0.0689356	0.283799	0.000526039	4.86387e-06	0.232693	0.525419	0.2317	0.0101875
	JS-Erz-3s	110	rim y'	38.82	6.18	8.2	0.1414	24.75	21.94	<0.027	0.4475	100.47	0.999995	0.649567	0.0658776	0.284025	0.000526039	4.76512e-06	0.235747	0.529767	0.22479	0.00969552
	JS-Erz-3s	150	core	39.58	7.88	10.39	0.1081	19.9	22.11	<0.026	0.4233	100.4	0.999991	0.711199	0.0214075	0.266859	0.000526039	8.50311e-06	0.29439	0.417438	0.279174	0.00899709
	JS-Erz-3s	150	mantle x	39.72	7.84	11.02	0.1822	19.21	22.25	0.043	0.3834	100.65	0.999993	0.758328	0.0179016	0.223763	2.7036e-07	6.72301e-06	0.292975	0.402923	0.295964	0.00813818
	JS-Erz-3s	150	mantle x'	39.28	7.97	9.96	0.1149	20.37	21.85	0.0309	0.4204	100	0.999991	0.681208	0.0211598	0.297623	1.72695e-07	9.24789e-06	0.297425	0.426604	0.267058	0.00891289
	JS-Erz-3s	150	rim x	40	7.64	10.7	0.1409	19.42	22.35	0.0437	0.4098	100.7	0.99999	0.737083	0.0209531	0.241954	2.4627e-07	9.59726e-06	0.288751	0.411853	0.290601	0.00879539
	JS-Erz-3s	150	rim x'	39.11	7.66	9.85	0.0978	20.91	21.96	0.0304	0.4634	100.08	0.999993	0.6859	0.0292618	0.284831	1.70682e-07	6.8781e-06	0.286418	0.438824	0.264904	0.00985383
	JS-Erz-3s	150	mantle y	39.41	7.86	10.39	0.1424	19.96	22.27	0.0345	0.3959	100.46	0.999996	0.755628	0.0220653	0.222303	2.12022e-07	4.32145e-06	0.293972	0.418542	0.279083	0.00840392
	JS-Erz-3s	150	mantle y'	39.45	7.86	10.75	0.1272	19.38	22.09	<0.026	0.397	100.08	0.999993	0.742205	0.0190886	0.238699	7.61766e-08	7.00483e-06	0.294668	0.407339	0.289539	0.00845453
	JS-Erz-3s	150	rim y	39.3	8.07	9.99	0.1074	20.17	22.29	<0.026	0.385	100.32	0.999997	0.757674	0.0218922	0.219904	0.000526039	3.37651e-06	0.301295	0.422407	0.26813	0.00816764
	JS-Erz-3s	150	rim y'	39.97	7.91	10.05	0.1014	19.95	22.56	<0.026	0.3887	100.94	0.999995	0.754281	0.0219274	0.223786	7.29221e-08	5.2487e-06	0.297958	0.421645	0.272078	0.00831863
	JS-Erz-3s	187	core	38.94	5.83	7.77	0.0773	25.67	21.98	<0.027	0.4327	100.69	0.999995	0.63685	0.0770182	0.285601	0.000526039	5.19278e-06	0.223762	0.552559	0.214244	0.00943475
	JS-Erz-3s	187	mantle x	38.91	6.05	7.62	0.1142	25.45	21.88	<0.027	0.405	100.45	0.999994	0.637062	0.0645765	0.29783	0.000526039	5.50496e-06	0.232352	0.548332	0.210486	0.00883006
	JS-Erz-3s	187	mantle x'	38.35	5.62	7.63	0.0705	26.06	21.66	<0.027	0.4529	99.85	0.999995	0.615474	0.0893162	0.294678	0.000526039	5.11389e-06	0.216197	0.562839	0.211065	0.00989935
	JS-Erz-3s	187	rim x	39	5.95	7.84	0.1365	25.66	22.13	<0.027	0.4432	101.15	0.999996	0.647117	0.0791535	0.273199	0.000526039	4.0831e-06	0.226757	0.548886	0.214753	0.00960384
	JS-Erz-3s	187	rim x'	38.32	5.67	7.69	0.0628	26.14	21.63	<0.026	0.4524	99.96	0.999995	0.614267	0.0868253	0.298377	0.000526039	4.9505e-06	0.217073	0.561457	0.211638	0.0098325
	JS-Erz-3s	187	mantle y	38.67	6.02	7.57	0.1108	25.82	22.02	<0.027	0.4115	100.66	0.999997	0.661212	0.0759521	0.262307	0.000526039	2.95081e-06	0.230049	0.553047	0.207974	0.00892976
	JS-Erz-3s	187	mantle y'	38.99	5.98	7.93	0.0814	25.48	22.31	<0.027	0.4028	101.18	0.999998	0.694409	0.0745283	0.230534	0.000526039	2.35267e-06	0.228097	0.545594	0.217569	0.00873954
	JS-Erz-3s	187	rim y	38.89	6.28	9.03	0.1043	24.09	22.1	<0.026	0.3024	100.83	0.999998	0.769487	0.0376793	0.192832	7.94359e-09	1.63223e-06	0.237383	0.510803	0.245318	0.00649662
	JS-Erz-3s	187	rim y'	39.1	6.19	7.98	0.0724	25.23	22.17	<0.026	0.4282	101.18	0.999996	0.660293	0.0677302	0.271447	0.000526039	3.89027e-06	0.235	0.537738	0.218024	0.00923691
	JS-Erz-3s	195	core	38.83	6.05	8.45	0.1042	24.8	21.98	0.0393	0.3503	100.6	0.999997	0.715064	0.051621	0.233312	2.40322e-08	2.74782e-06	0.230717	0.530151	0.231547	0.00758544
	JS-Erz-3s	195	mantle x	38.9	5.9	8.39	0.1654	24.68	22.14	<0.026	0.3588	100.56	0.999998	0.725542	0.0585715	0.215884	8.09544e-09	2.49779e-06	0.227318	0.532814	0.232016	0.0078513
	JS-Erz-3s	195	mantle x'	38.37	6.08	8.46	0.1113	24.63	21.61	<0.027	0.3789	99.65	0.999996	0.681828	0.0525709	0.265071	0.000526039	3.70661e-06	0.232237	0.527303	0.232237	0.00822368
	JS-Erz-3s	195	rim x	39.21	6.13	8.28	0.1112	24.76	22.28	<0.026	0.329	101.11	0.999998	0.735878	0.0493133	0.214281	0.000526039	2.2921e-06	0.234333	0.531065	0.227456	0.00714573
	JS-Erz-3s	195	rim x'	37.85	6.31	8.36	0.1084	24.49	21.31	0.0272	0.3452	98.81	0.999997	0.692267	0.0434965	0.264234	1.79674e-08	2.82005e-06	0.24029	0.523338	0.22891	0.00746232
	JS-Erz-3s	195	mantle y	38.62	6.16	8.31	0.1411	25.13	21.94	<0.027	0.3968	100.71	0.999997	0.688043	0.0609168	0.250511	0.000526039	2.64841e-06	0.232864	0.532825	0.225793	0.00851862
	JS-Erz-3s	195	mantle y'	39.06	6.07	8.55	0.1367	24.99	22.11	<0.027	0.3713	101.31	0.999997	0.704594	0.0549228	0.239954	0.000526039	2.96878e-06	0.229643	0.530086	0.232296	0.00797533
	JS-Erz-3s	195	rim y	38.8	6.2	8.19	0.1186	24.73	21.68	<0.026	0.3579	100.09	0.999995	0.665799	0.0457829	0.287887	0.000526039	5.2721e-06	0.236994	0.530171	0.225062	0.00777275
	JS-Erz-3s	195	rim y'	39.27	6.06	8.15	0.1238	24.85	22.29	<0.027	0.382	101.13	0.999997	0.699569	0.0606931	0.239208	0.000526039	3.33013e-06	0.232562	0.534455	0.224653	0.00832983
	JS-Erz-3s	197	core	38.72	6.04	7.77	0.1105	25.46	22.08	0.0519	0.4605	100.68	0.999997	0.64863	0.0833777	0.267989	7.75957e-08	3.42753e-06	0.230701	0.545899	0.213403	0.00999651
	JS-Erz-3s	197	mantle x	38.76	6.23	7.76	0.1088	25.09	22.06	<0.027	0.3974	100.41	0.999997	0.679688	0.0644575	0.255326	0.000526039	2.91947e-06	0.238638	0.53906	0.213659	0.00864294
	JS-Erz-3s	197	mantle x'	38.53	5.85	7.78	0.1141	25.61	21.96	<0.027	0.4372	100.29	0.999997	0.657361	0.0836502	0.25846	0.000526039	3.17789e-06	0.224478	0.551309	0.214675	0.00953742
	JS-Erz-3s	197	rim x	39.32	6.58	7.79	0.1107	24.68	22.44	<0.026	0.3774	101.3	0.999997	0.704665	0.0550433	0.239764	0.000526039	2.52229e-06	0.250768	0.527553	0.213505	0.0081743
	JS-Erz-3s	197	rim x'	38.21	5.83	7.7	0.1163	25.69	21.52	<0.027	0.4562	99.54	0.999994	0.608611	0.0793556	0.311502	0.000526039	5.57698e-06	0.224001	0.553414	0.212636	0.00994828
	JS-Erz-3s	197	mantle y	38.58	6.12	7.72	0.1051	25.08	21.93	0.0271	0.4186	99.98	0.999997	0.663334	0.0701052	0.266558	2.14116e-08	3.44641e-06	0.235382	0.541729	0.213726	0.00916209
	JS-Erz-3s	197	mantle y'	38.72	6.1	7.93	0.1387	25.23	22.08	0.0402	0.4251	100.67	0.999997	0.673689	0.0728279	0.253481	4.41549e-08	2.89398e-06	0.23286	0.540347	0.217568	0.00922463
	JS-Erz-3s	197	rim y	38.58	6.6	7.76	0.0936	24.73	22.01	<0.027	0.3677	100.17	0.999998	0.701412	0.0526329	0.245427	0.000526039	2.10547e-06	0.251319	0.528265	0.212463	0.00795291
	JS-Erz-3s	197	rim y'	39.08	6.61	7.77	0.1241	24.4	22.04	<0.027	0.3364	100.37	0.999996	0.696106	0.0423081	0.261056	0.000526039	3.50325e-06	0.25344	0.524959	0.214269	0.00733202
	JS-Erz-3s	206	core	39.38	7.11	10.38	0.1988	20.94	22	<0.026	0.4201	100.44	0.999992	0.710984	0.0278812	0.260601	0.000526039	7.72064e-06	0.267774	0.442201	0.281039	0.0089866
	JS-Erz-3s	206	mantle x	39.67	7.19	10.16	0.1648	21.3	22.3	0.0264	0.4424	101.25	0.999994	0.712691	0.0320592	0.255243	6.68778e-08	6.43296e-06	0.269313	0.447635	0.273638	0.00941513
	JS-Erz-3s	206	mantle x'	39.16	7.11	10.07	0.173	21.38	21.99	<0.026	0.4376	100.31	0.999994	0.705309	0.0322022	0.261956	0.000526039	6.15303e-06	0.267279	0.451137	0.272235	0.00934981
	JS-Erz-3s	206	rim x	39.8	6.96	9.91	0.1309	21.76	22.37	<0.026	0.4856	101.41	0.999992	0.687167	0.0400695	0.27223	0.000526039	8.00945e-06	0.261956	0.459511	0.268145	0.0103879
	JS-Erz-3s	206	rim x'	38.93	7.29	9.55	0.1531	21.86	21.84	<0.027	0.4512	100.08	0.999994	0.675086	0.0336393	0.290743	0.000526039	6.29254e-06	0.273177	0.459778	0.257436	0.00960876
	JS-Erz-3s	206	mantle y	39.39	7.05	10.01	0.1703	21.54	22.21	<0.026	0.4568	100.83	0.999994	0.708598	0.0364227	0.254447	0.000526039	5.75672e-06	0.265115	0.454364	0.270759	0.00976128
	JS-Erz-3s	206	mantle y'	39.52	6.97	10.47	0.1866	20.8	22.39	<0.026	0.431	100.77	0.999995	0.751293	0.0334234	0.214753	0.000526039	4.67675e-06	0.263969	0.441846	0.284906	0.00927911
	JS-Erz-3s	206	rim y	39.12	7.26	9.67	0.1239	21.88	21.81	<0.027	0.4757	100.34	0.999991	0.648116	0.0336324	0.317716	0.000526039	9.24642e-06	0.271311	0.458738	0.259842	0.0101086
	JS-Erz-3s	206	rim y'	39.76	7.02	10.61	0.1348	20.68	22.38	<0.026	0.4215	101.03	0.999994	0.743663	0.0298559	0.226475	3.80174e-08	6.1753e-06	0.264957	0.438076	0.287917	0.00904977
	JS-Erz-3s	226	core	39.11	6.75	10.3	0.1146	21.43	22.35	<0.027	0.4312	100.48	0.999997	0.762268	0.0401636	0.19704	0.000526039	2.82025e-06	0.255544	0.455022	0.280167	0.00926681
	JS-Erz-3s	226	mantle x	39.21	6.73	10.42	0.1233	21.27	22.21	0.0285	0.463	100.46	0.999995	0.731929	0.0401327	0.227933	6.47411e-08	4.9278e-06	0.254793	0.451671	0.283584	0.00995207
	JS-Erz-3s	226	mantle x'	39.02	6.96	9.95	0.0939	21.74	21.97	<0.027	0.4996	100.24	0.999993	0.680027	0.0413366	0.278104	0.000526039	6.68973e-06	0.261702	0.458678	0.268948	0.0106723
	JS-Erz-3s	226	rim x	39.44	6.72	9.96	0.1095	21.86	22.32	<0.026	0.4543	100.87	0.999995	0.720159	0.0421964	0.237114	0.000526039	5.06178e-06	0.254533	0.464444	0.271246	0.00977689
	JS-Erz-3s	226	rim x'	38.88	6.57	9.43	0.0525	22.53	21.94	<0.026	0.5174	99.94	0.999993	0.66273	0.0538379	0.282899	0.000526039	6.73341e-06	0.250104	0.480981	0.257728	0.0111875
	JS-Erz-3s	226	mantle y	39.42	6.81	10.4	0.1316	21.31	21.93	<0.027	0.4185	100.42	0.999991	0.700469	0.0297687	0.269227	0.000526039	9.28256e-06	0.257134	0.45152	0.282366	0.00898059
	JS-Erz-3s	226	mantle y'	39.09	6.78	10.14	0.0949	21.54	22.1	<0.027	0.4592	100.21	0.999995	0.718425	0.0399967	0.241047	0.000526039	5.10445e-06	0.25678	0.457494	0.275856	0.00986979
	JS-Erz-3s	226	rim y	39.03	6.6	10.15	0.0896	22.02	21.98	<0.026	0.4766	100.36	0.999994	0.696427	0.0436343	0.259406	0.000526039	6.07442e-06	0.24889	0.465761	0.275132	0.0102164
	JS-Erz-3s	226	rim y'	39.61	6.85	9.64	0.0681	22.23	22.23	<0.027	0.4821	101.11	0.999992	0.673016	0.0423875	0.284063	0.000526039	8.10013e-06	0.258333	0.470167	0.261167	0.0103333
	JS-Erz-3s	240	core	39.32	6.82	11.83	0.2079	19.63	22.32	<0.026	0.3391	100.47	0.999997	0.824987	0.0215967	0.152887	0.000526039	2.76567e-06	0.257174	0.415141	0.320427	0.00725747
	JS-Erz-3s	240	mantle x	39.46	6.84	11.55	0.1714	20.07	22.24	<0.026	0.3324	100.66	0.999996	0.806268	0.0209337	0.172269	0.000526039	3.56043e-06	0.257037	0.423629	0.312235	0.00709927
	JS-Erz-3s	240	mantle x'	39.24	6.74	11.53	0.1627	20.39	22.15	<0.026	0.3648	100.59	0.999996	0.79154	0.0250188	0.182911	0.000526039	3.61142e-06	0.252644	0.428949	0.310641	0.00776603
	JS-Erz-3s	240	rim x	39.65	6.88	10.74	0.0906	20.9	22.43	0.0318	0.3341	101.06	0.999997	0.796945	0.0243562	0.178695	4.35088e-08	3.04849e-06	0.259417	0.442229	0.291196	0.00715863
	JS-Erz-3s	240	rim x'	38.78	6.88	10.47	0.1073	21.31	21.85	<0.027	0.3862	99.78	0.999996	0.746787	0.0292313	0.223451	0.000526039	3.87929e-06	0.258925	0.449634	0.283194	0.0082482
	JS-Erz-3s	240	mantle y	39.31	6.62	12.03	0.2037	19.77	22.12	<0.026	0.3492	100.39	0.999996	0.80534	0.0220884	0.172041	0.000526039	4.23627e-06	0.249253	0.41769	0.325589	0.00746764
	JS-Erz-3s	240	mantle y'	39.51	6.74	11.22	0.1523	20.33	22.22	<0.026	0.3699	100.54	0.999995	0.778863	0.0253698	0.195237	0.000526039	4.98187e-06	0.254988	0.431775	0.305284	0.00795375
	JS-Erz-3s	240	rim y	39.5	6.79	12.08	0.2142	19.43	21.99	<0.026	0.33	100.34	0.999993	0.792215	0.0175139	0.189739	0.000526039	6.55439e-06	0.255584	0.410363	0.326995	0.00705804
	JS-Erz-3s	240	rim y'	39.38	6.72	11.07	0.1643	20.79	22.34	<0.026	0.3702	100.84	0.999997	0.791805	0.0285096	0.179156	0.000526039	3.07576e-06	0.253095	0.439297	0.299687	0.00792066
	JS-Erz-5s	364	core	38.71	7.93	3.08	0.0744	28.03	22.18	0.0372	0.3662	100.41	0.999994	0.461564	0.0892465	0.449183	2.26159e-07	6.09225e-06	0.304148	0.602956	0.0849211	0.00797491
	JS-Erz-5s	364	mantle x	38.84	8	3.05	0.0714	28.03	22.23	<0.027	0.3346	100.58	0.999994	0.478538	0.0803041	0.440626	0.000526039	5.60222e-06	0.306351	0.602345	0.084021	0.00728293
	JS-Erz-5s	364	mantle x'	38.76	8	3.1	0.0773	28.05	22.32	<0.027	0.337	100.65	0.999996	0.499456	0.0857472	0.414266	0.000526039	4.07807e-06	0.305876	0.601578	0.0852249	0.00732167
	JS-Erz-5s	364	rim x	39.15	7.82	3.11	0.067	27.9	22.16	0.0416	0.3594	100.6	0.999989	0.435499	0.0777964	0.486693	1.94954e-07	1.13611e-05	0.301999	0.603997	0.0861168	0.00788702
	JS-Erz-5s	364	rim x'	38.44	7.28	3.16	0.079	29.11	21.79	<0.027	0.409	100.25	0.999989	0.399254	0.103888	0.496321	0.000526039	1.05746e-05	0.278898	0.625413	0.0867941	0.00889433
	JS-Erz-5s	364	mantle y	38.96	8.01	3.04	0.0674	28.29	22.12	<0.026	0.3351	100.84	0.999992	0.448775	0.0736339	0.477057	0.000526039	7.91226e-06	0.305128	0.604432	0.0831864	0.00725385
	JS-Erz-5s	364	mantle y'	39.03	7.96	3.2	0.0644	28.22	22.17	0.0331	0.3415	101.02	0.999993	0.459833	0.0737853	0.466374	1.29805e-07	7.37071e-06	0.302849	0.602201	0.0875747	0.00737559
	JS-Erz-5s	364	rim y	38.75	7.63	3.12	0.0656	28.15	21.94	<0.027	0.4126	100.06	0.999987	0.399268	0.0923124	0.507881	0.000526039	1.32986e-05	0.294624	0.609828	0.0864968	0.00905121
	JS-Erz-5s	364	rim y'	38.96	7.94	3.1	0.0486	27.99	22.33	<0.026	0.3459	100.73	0.999994	0.48104	0.0847629	0.433666	0.000526039	5.62261e-06	0.304443	0.602347	0.0856664	0.00754401
	JS-Erz-8s	83	core	39.08	8.35	2.73	0.0367	27.88	22.11	<0.027	0.4135	100.61	0.999982	0.364185	0.0817595	0.553511	0.000526039	1.77503e-05	0.318883	0.597217	0.0749232	0.00897744
	JS-Erz-8s	83	mantle x	39.06	7.99	3.35	<0.023	27.46	22.33	<0.026	0.4452	100.67	0.999991	0.43404	0.0954677	0.470483	1.59705e-07	9.14421e-06	0.306657	0.591158	0.0924838	0.00970157
	JS-Erz-8s	83	mantle x'	38.85	8.39	2.78	0.0554	27.96	21.93	<0.027	0.3992	100.38	0.999984	0.365017	0.0749212	0.55952	0.000526039	1.64889e-05	0.318922	0.596446	0.0760047	0.00862711
	JS-Erz-8s	83	rim x	39.53	7.74	3.95	0.0273	27.09	22.5	0.0314	0.4141	101.28	0.999992	0.487717	0.081054	0.431221	1.37345e-07	8.17817e-06	0.297557	0.584268	0.109127	0.0090487
	JS-Erz-8s	83	rim x'	38.82	8.47	2.91	0.0493	27.99	22.13	<0.027	0.4145	100.79	0.99999	0.396696	0.0842183	0.51855	0.000526039	9.88623e-06	0.319708	0.592425	0.078979	0.0088872
	JS-Erz-8s	83	mantle y	39.07	8.27	3.05	0.0405	27.99	22.31	<0.026	0.4096	101.16	0.999991	0.420553	0.0877146	0.491198	0.000526039	8.82517e-06	0.313331	0.594747	0.0831117	0.00880984
	JS-Erz-8s	83	mantle y'	39.03	8.26	2.91	<0.024	28.03	22.35	<0.027	0.3951	100.99	0.999992	0.427147	0.0910402	0.481279	0.000526039	8.06184e-06	0.314104	0.59788	0.0794841	0.00853163
	JS-Erz-8s	83	rim y	38.66	8.39	2.9	<0.023	28.06	21.92	<0.027	0.4219	100.37	0.999987	0.372873	0.081086	0.545503	0.000526039	1.27899e-05	0.31728	0.594962	0.0787039	0.00905342
	JS-Erz-8s	83	rim y'	39.49	8.26	2.78	0.0414	27.61	22.46	<0.027	0.4239	101.07	0.999984	0.387178	0.0912434	0.521036	0.000526039	1.62819e-05	0.317882	0.595966	0.0768879	0.00926381
	JS-Erz-8s	272	core	38.79	7.98	2.31	<0.024	29.06	22.1	0.0338	0.295	100.58	0.999991	0.420229	0.0845561	0.495206	1.2384e-07	8.89671e-06	0.305539	0.624406	0.0636401	0.00641399
	JS-Erz-8s	272	mantle x	38.8	7.82	2.27	0.025	29.06	22.08	<0.026	0.2861	100.36	0.99999	0.422074	0.0857015	0.492215	4.28603e-08	9.64599e-06	0.301588	0.629147	0.0629985	0.00626634
	JS-Erz-8s	272	mantle x'	38.58	7.98	2.28	0.0235	28.7	22.16	<0.027	0.2677	99.99	0.999995	0.46918	0.0850485	0.44524	0.000526039	5.46029e-06	0.308383	0.622457	0.0632837	0.00587635
	JS-Erz-8s	272	rim x	38.73	7.14	2.28	<0.024	29.96	22.13	<0.027	0.3288	100.59	0.99999	0.399084	0.125603	0.474776	0.000526039	1.0434e-05	0.277185	0.652031	0.063539	0.00724479
	JS-Erz-8s	272	rim x'	38.21	7.81	2.89	<0.024	28.24	21.7	<0.027	0.2941	99.17	0.999994	0.465271	0.0700984	0.464098	0.000526039	6.39275e-06	0.301656	0.611589	0.080298	0.00645695
	JS-Erz-8s	272	mantle y	38.56	7.78	2.3	<0.023	29.34	22.09	0.0275	0.2611	100.36	0.999995	0.464601	0.0861072	0.449286	5.99113e-08	5.41331e-06	0.298642	0.632241	0.0634239	0.00569317
	JS-Erz-8s	272	mantle y'	38.94	7.85	2.29	<0.023	29.05	22.36	<0.027	0.2725	100.77	0.999994	0.466426	0.0907001	0.442342	0.000526039	5.90506e-06	0.302363	0.628101	0.0635668	0.0059699
	JS-Erz-8s	272	rim y	38.58	7.47	2.42	<0.023	29.55	21.81	<0.027	0.3174	100.18	0.999987	0.387198	0.0917621	0.520501	0.000526039	1.29771e-05	0.287505	0.638531	0.0670125	0.00695068
	JS-Erz-8s	272	rim y'	38.72	7.59	2.45	<0.023	28.95	22.37	<0.027	0.2687	100.37	0.999996	0.506501	0.0974406	0.395528	0.000526039	3.88498e-06	0.294862	0.630883	0.0683175	0.00593772
	JS-Erz-13s	1	core	38.88	7.78	5.26	0.0885	25.84	22.09	<0.027	0.3428	100.28	0.999997	0.599266	0.0491531	0.351051	0.000526039	3.48558e-06	0.296293	0.552204	0.144075	0.00742809
	JS-Erz-13s	1	mantle x	38.98	7.91	4.83	0.0706	25.8	22.21	<0.026	0.3373	100.16	0.999996	0.593761	0.0515987	0.354637	8.20102e-08	3.6366e-06	0.303675	0.555565	0.133403	0.00735725
	JS-Erz-13s	1	mantle x'	38.97	7.73	4.91	0.1002	26.08	22.03	<0.026	0.309	100.13	0.999996	0.590595	0.0452428	0.363632	0.000526039	4.20189e-06	0.296473	0.561343	0.135445	0.00673879
	JS-Erz-13s	1	rim x	39.23	8.01	4.29	0.0378	26.42	22.24	<0.027	0.352	100.61	0.999994	0.533765	0.0560629	0.410166	8.17204e-08	5.95737e-06	0.306783	0.567583	0.117981	0.0076528
	JS-Erz-13s	1	rim x'	38.59	7.88	4.81	0.1115	26.25	21.78	<0.026	0.3343	99.75	0.999995	0.553022	0.0469358	0.399511	0.000526039	4.7394e-06	0.30001	0.561075	0.131688	0.00722796
	JS-Erz-13s	1	mantle y	38.92	7.71	5.1	0.1005	26.17	22.05	<0.027	0.3293	100.4	0.999996	0.590224	0.0484348	0.360811	0.000526039	3.82095e-06	0.293819	0.559371	0.139676	0.00713347
	JS-Erz-13s	1	mantle y'	39.05	7.91	4.94	0.0596	25.91	22.12	<0.026	0.3509	100.35	0.999995	0.56858	0.04981	0.381079	0.000526039	4.76894e-06	0.301822	0.555092	0.135478	0.00760812
	JS-Erz-13s	1	rim y	38.53	7.98	4.76	0.0551	26.3	21.82	<0.026	0.3424	99.79	0.999996	0.554033	0.0490778	0.396359	0.000526039	4.16504e-06	0.302866	0.559858	0.129894	0.00738256
	JS-Erz-13s	1	rim y'	39.02	8	4.91	0.0697	25.66	22.21	0.0349	0.3263	100.23	0.999997	0.602437	0.0472452	0.350314	1.40385e-07	3.48692e-06	0.306307	0.551352	0.135244	0.00709695
	JS-Erz-13s	35	core	39.64	7.24	11.76	0.2068	19.13	22.22	0.0285	0.3381	100.56	0.999995	0.799313	0.0168993	0.183783	5.6649e-08	5.24167e-06	0.27185	0.403278	0.317659	0.0072127
	JS-Erz-13s	35	mantle x	39.67	7.26	11.72	0.2185	19.15	22.05	<0.026	0.3873	100.46	0.99999	0.753784	0.0186176	0.227062	0.000526039	9.79854e-06	0.272363	0.40331	0.316068	0.00825897
	JS-Erz-13s	35	mantle x'	39.41	7.45	11.19	0.1632	19.32	21.76	<0.026	0.3686	99.67	0.999988	0.728043	0.0164699	0.254949	0.000526039	1.16696e-05	0.280669	0.408427	0.30301	0.00789382
	JS-Erz-13s	35	rim x	39.78	7.28	10.97	0.219	19.66	22.38	<0.027	0.4067	100.7	0.999993	0.761812	0.0240452	0.21361	0.000526039	6.5295e-06	0.275462	0.417311	0.298487	0.0087395
	JS-Erz-13s	35	rim x'	39.23	7.52	10.76	0.1561	19.78	21.78	0.0435	0.4057	99.68	0.99999	0.711359	0.0202706	0.26836	2.11752e-07	1.00908e-05	0.283	0.417409	0.290916	0.00867471
	JS-Erz-13s	35	mantle y	39.58	7.2	11.73	0.1917	19.37	22	0.0262	0.3892	100.48	0.999991	0.751137	0.0192924	0.229561	5.48373e-08	9.32946e-06	0.269447	0.406653	0.315624	0.00827541
	JS-Erz-13s	35	mantle y'	39.54	7.27	11.6	0.2015	19.28	22.03	<0.027	0.4067	100.34	0.999991	0.747165	0.0204456	0.231854	0.000526039	9.2902e-06	0.272819	0.405748	0.312764	0.00866856
	JS-Erz-13s	35	rim y	39.19	7.7	10.6	0.1147	20.06	21.99	0.0432	0.3916	100.09	0.999995	0.7406	0.0210132	0.238381	2.52707e-07	5.39554e-06	0.287492	0.419991	0.284208	0.00830788
	JS-Erz-13s	35	rim y'	39.73	7.55	10.83	0.1794	19.73	22.33	<0.026	0.4029	100.77	0.999994	0.754238	0.0222413	0.223515	6.86297e-08	6.26301e-06	0.283307	0.415784	0.292317	0.00859264
	JS-Erz-13s	116	core	38.73	7.59	3.13	0.0502	28.46	22.05	<0.027	0.286	100.31	0.999995	0.505542	0.0721548	0.421772	0.000526039	5.06608e-06	0.292093	0.614932	0.0867255	0.00624958
	JS-Erz-13s	116	mantle x	38.82	7.62	3.1	0.042	28.78	22.17	<0.027	0.2641	100.79	0.999996	0.530792	0.0699969	0.398682	0.000526039	3.7335e-06	0.291481	0.617459	0.0853276	0.00573295
	JS-Erz-13s	116	mantle x'	38.71	7.58	3.01	0.0382	28.93	21.87	<0.027	0.2833	100.43	0.999993	0.46773	0.0681766	0.46356	0.000526039	7.10471e-06	0.290141	0.620925	0.082779	0.00615451
	JS-Erz-13s	116	rim x	38.96	7.39	3.14	0.064	28.62	22.05	<0.027	0.2873	100.51	0.999993	0.488781	0.0721333	0.438552	0.000526039	7.08438e-06	0.285618	0.620661	0.087417	0.00630411
	JS-Erz-13s	116	rim x'	38.07	7.43	3.13	0.0535	28.87	21.53	<0.027	0.2811	99.37	0.999994	0.477837	0.0683148	0.453317	0.000526039	5.65934e-06	0.285371	0.622195	0.0863018	0.00613154
	JS-Erz-13s	116	mantle y	38.6	7.43	3.34	0.0637	28.52	22.1	<0.027	0.2553	100.31	0.999997	0.56738	0.0683299	0.363762	0.000526039	2.76425e-06	0.286072	0.615872	0.0924643	0.00559125
	JS-Erz-13s	116	mantle y'	38.83	7.6	3	<0.023	28.85	21.95	<0.027	0.2774	100.52	0.999993	0.475902	0.067132	0.456433	0.000526039	6.93966e-06	0.291264	0.620142	0.0825525	0.00604164
	JS-Erz-13s	116	rim y	38.36	7.31	3.25	0.0474	28.93	21.85	<0.027	0.273	100.02	0.999996	0.522369	0.073531	0.40357	0.000526039	3.85473e-06	0.280841	0.623448	0.08975	0.00596125
	JS-Erz-13s	116	rim y'	38.59	7.4	3.13	0.0352	28.38	21.85	<0.027	0.285	99.69	0.999993	0.48982	0.0706905	0.438957	0.000526039	6.67808e-06	0.287337	0.618738	0.0876252	0.00629963
	JS-Erz-13s	189	core	38.34	4.66	5.77	0.0384	29.69	21.83	<0.027	0.4498	100.78	0.999995	0.52797	0.191939	0.27956	0.000526039	5.27995e-06	0.181211	0.647516	0.161336	0.00993737
	JS-Erz-13s	189	mantle x	38.48	4.63	5.5	0.0484	30.05	22.03	<0.027	0.4627	101.21	0.999995	0.514354	0.218673	0.266442	0.000526039	4.79179e-06	0.180171	0.655762	0.153833	0.0102332
	JS-Erz-13s	189	mantle x'	38.19	4.65	6.41	0.0593	29.43	21.86	<0.027	0.4685	101.07	0.999996	0.554194	0.192019	0.253258	0.000526039	3.54948e-06	0.178622	0.634181	0.176969	0.0102282
	JS-Erz-13s	189	rim x	38.53	4.67	5.55	0.0491	29.74	21.86	<0.026	0.431	100.85	0.999994	0.524188	0.183986	0.291294	0.000526039	6.44831e-06	0.18231	0.652214	0.155906	0.00956962
	JS-Erz-13s	189	rim x'	38.32	4.45	6.55	0.0354	29.31	21.67	<0.027	0.4692	100.81	0.999993	0.534907	0.184221	0.28034	0.000526039	6.63739e-06	0.171947	0.63584	0.181906	0.0103069
	JS-Erz-13s	189	mantle y	38.23	4.72	5.88	0.0347	29.71	21.94	<0.027	0.4385	100.96	0.999997	0.554712	0.193109	0.251649	0.000526039	3.21965e-06	0.182577	0.644341	0.163455	0.0096277
	JS-Erz-13s	189	mantle y'	38.25	4.64	5.99	0.0286	29.68	21.83	0.0348	0.4508	100.9	0.999996	0.54059	0.192313	0.267092	4.97357e-09	4.33329e-06	0.179367	0.644159	0.166567	0.00990757
	JS-Erz-13s	189	rim y	38.12	4.42	6.71	0.0317	29.12	21.7	<0.027	0.432	100.53	0.999996	0.576869	0.17747	0.245132	0.000526039	4.0384e-06	0.171245	0.632595	0.186662	0.00949886
	JS-Erz-13s	189	rim y'	38.36	4.76	5.54	0.0466	29.9	21.99	<0.027	0.4741	101.09	0.999996	0.515022	0.212985	0.271463	0.000526039	4.39716e-06	0.184718	0.650355	0.154489	0.0104384
	JS-Erz-14s	89	core	38.87	8.02	3.12	0.0396	28.03	21.91	<0.026	0.3541	100.36	0.999988	0.418367	0.0683952	0.513226	5.68841e-08	1.16419e-05	0.306361	0.600435	0.0855155	0.00768809
	JS-Erz-14s	89	mantle x	38.9	7.84	3.17	0.0415	27.71	21.91	<0.027	0.3668	99.93	0.999986	0.416961	0.0720004	0.510498	0.000526039	1.37588e-05	0.302929	0.600996	0.0880119	0.00806357
	JS-Erz-14s	89	mantle x'	38.38	7.66	3.56	0.0354	28.08	21.85	0.0477	0.4007	100.02	0.999993	0.450713	0.0867578	0.462522	3.03433e-07	6.72606e-06	0.292348	0.601349	0.0976141	0.00868963
	JS-Erz-14s	89	rim x	38.92	7.4	3.14	0.0452	28.29	22.02	<0.027	0.4226	100.24	0.999985	0.395704	0.100138	0.503617	0.000526039	1.51564e-05	0.286999	0.615937	0.0877503	0.009314
	JS-Erz-14s	89	rim x'	37.92	7.27	3.3	0.0344	28.46	21.46	<0.027	0.4552	98.91	0.999987	0.379424	0.105127	0.51491	0.000526039	1.25899e-05	0.281094	0.617188	0.091722	0.00999555
	JS-Erz-14s	89	mantle y	38.79	7.9	3.25	0.0375	27.96	21.93	<0.027	0.3679	100.25	0.99999	0.429867	0.0736738	0.495923	0.000526039	1.01715e-05	0.302305	0.600289	0.0894118	0.00799388
	JS-Erz-14s	89	mantle y'	38.6	7.87	2.98	0.0492	27.79	21.74	<0.027	0.3969	99.44	0.999983	0.380361	0.0789182	0.540703	8.66638e-08	1.70451e-05	0.304659	0.603809	0.0828005	0.00873078
	JS-Erz-14s	89	rim y	38.44	7.14	3.24	0.0372	28.65	21.66	<0.027	0.4469	99.62	0.999983	0.37139	0.104916	0.523151	0.000526039	1.71691e-05	0.276719	0.623033	0.0904081	0.00984
	JS-Erz-14s	89	rim y'	38.9	7.23	3.27	0.0391	28.21	21.81	<0.027	0.4293	99.91	0.999978	0.375147	0.0920746	0.53223	0.000526039	2.24445e-05	0.281963	0.617016	0.0915158	0.00950551
	JS-Erz-14s	242	core	38.58	5.64	9.11	0.1153	24.43	21.82	<0.027	0.3795	100.08	0.999997	0.71596	0.0591104	0.224401	0.000526039	3.24901e-06	0.216022	0.524885	0.250837	0.00825624
	JS-Erz-14s	242	mantle x	38.81	5.78	8.67	0.1498	24.59	21.87	0.0561	0.3972	100.33	0.999995	0.686315	0.0607717	0.252909	4.30325e-08	4.5132e-06	0.222185	0.529775	0.239366	0.00867389
	JS-Erz-14s	242	mantle x'	38.58	5.63	9.24	0.1403	24.13	21.38	<0.027	0.3916	99.49	0.999991	0.65931	0.0497864	0.290369	0.000526039	8.80211e-06	0.216209	0.520026	0.255219	0.00854588
	JS-Erz-14s	242	rim x	39.25	6.11	8.42	0.0957	24.19	22.1	<0.027	0.3779	100.54	0.999995	0.69299	0.0516662	0.254813	0.000526039	4.83721e-06	0.235419	0.523078	0.233228	0.00827421
	JS-Erz-14s	242	rim x'	38.04	5.71	9.13	0.1247	24.14	21.33	<0.026	0.4125	98.92	0.999995	0.673516	0.0573962	0.269083	1.13909e-08	5.14337e-06	0.219128	0.519936	0.251931	0.00900458
	JS-Erz-14s	242	mantle y	38.27	5.85	8.7	0.1325	24.24	21.67	<0.028	0.3782	99.24	0.999997	0.708119	0.0568687	0.234484	0.000526039	3.11147e-06	0.225721	0.524693	0.241299	0.00828638
	JS-Erz-14s	242	mantle y'	38.63	5.65	9.02	0.1408	24.21	21.88	0.0338	0.3917	99.96	0.999997	0.713908	0.0618439	0.224244	1.58246e-08	3.47544e-06	0.217812	0.523751	0.249858	0.00857896
	JS-Erz-14s	242	rim y	38.55	6.19	8.55	0.1208	24.18	21.88	<0.027	0.3532	99.84	0.999998	0.724397	0.048678	0.226396	0.000526039	2.46312e-06	0.237045	0.519707	0.235552	0.0076969
	JS-Erz-14s	242	rim y'	39.06	5.7	8.95	0.1456	24.5	21.92	<0.027	0.4105	100.69	0.999994	0.67798	0.0607233	0.260765	0.000526039	5.86242e-06	0.218419	0.526342	0.246305	0.00893379
	diamond-bearing garnets
	JS-Erz-9s	12	core	39.1	9.64	3.82	0.0509	25.16	22.35	0.0277	0.3683	100.51	0.999995	0.514441	0.0448926	0.440661	5.30252e-07	5.05475e-06	0.360861	0.528669	0.102632	0.00783764
	JS-Erz-9s	12	mantle x	39.25	9.08	4.3	0.095	24.82	22.24	<0.027	0.4155	100.21	0.999991	0.493949	0.0469699	0.458547	0.000526039	8.67602e-06	0.344862	0.528722	0.117457	0.00895941
	JS-Erz-9s	12	mantle x'	39.15	9.75	3.87	0.0527	25.02	22.12	<0.026	0.4109	100.39	0.99999	0.448404	0.0413479	0.509712	0.000526039	1.01766e-05	0.363815	0.523724	0.10376	0.00870136
	JS-Erz-9s	12	rim x	39.52	8.65	4.48	0.0656	25.28	22.36	<0.026	0.4462	100.81	0.99999	0.484912	0.0546334	0.459919	0.000526039	1.01312e-05	0.328831	0.539217	0.122305	0.00964684
	JS-Erz-9s	12	rim x'	38.85	9.92	3.79	0.0309	24.55	22	<0.026	0.3788	99.54	0.999992	0.470799	0.0375452	0.491121	0.000526039	8.35564e-06	0.372382	0.517298	0.102245	0.00807457
	JS-Erz-9s	12	mantle y	39.46	9.31	4.28	0.0419	25.04	22.23	<0.026	0.3948	100.77	0.99999	0.479953	0.0399997	0.479511	0.000526039	9.81778e-06	0.349257	0.526953	0.115369	0.00842063
	JS-Erz-9s	12	mantle y'	39.36	9.53	4.04	0.0577	24.79	22.26	<0.026	0.4005	100.44	0.99999	0.476271	0.0416559	0.481538	0.000526039	9.56941e-06	0.35859	0.523607	0.109237	0.00856631
	JS-Erz-9s	12	rim y	39.43	8.75	4.58	<0.023	25.25	22.28	<0.026	0.4562	100.79	0.99999	0.477662	0.0525118	0.46929	0.000526039	1.02446e-05	0.330679	0.535084	0.124442	0.00979543
	JS-Erz-9s	12	rim y'	39.61	9.25	4.21	0.055	24.88	22.55	<0.027	0.3552	100.9	0.999994	0.544949	0.0420003	0.412519	0.000526039	5.67585e-06	0.349904	0.527957	0.114511	0.00762847
	JS-Erz-9s	13	core	39.01	8.32	4.47	0.0474	26.14	22.32	0.0267	0.4058	100.74	0.999996	0.536389	0.0632114	0.400395	1.88572e-07	4.33273e-06	0.314928	0.554818	0.121522	0.00873232
	JS-Erz-9s	13	mantle x	39.11	8.37	4.23	<0.023	26.05	22.29	<0.026	0.3848	100.46	0.999995	0.524521	0.0589033	0.416044	0.000526039	5.47595e-06	0.318863	0.55705	0.115753	0.00833486
	JS-Erz-9s	13	mantle x'	39.03	8.2	4.72	0.0345	25.94	22.08	<0.026	0.3866	100.41	0.999994	0.52516	0.0519171	0.42239	0.000526039	6.19294e-06	0.310872	0.552072	0.128728	0.00832753
	JS-Erz-9s	13	rim x	39.24	8.41	3.93	0.06	26.03	22.6	<0.026	0.3781	100.67	0.999996	0.548768	0.0684068	0.382296	0.000526039	4.03754e-06	0.322875	0.560471	0.108413	0.00824074
	JS-Erz-9s	13	rim x'	38.43	8.21	4.93	0.0434	25.5	22	<0.026	0.3773	99.49	0.999997	0.580286	0.0541735	0.365011	0.000526039	3.03545e-06	0.312474	0.54448	0.134883	0.00816226
	JS-Erz-9s	13	mantle y	38.51	8.32	4.29	<0.023	25.92	22.24	<0.027	0.3706	99.67	0.999997	0.577155	0.0646393	0.357677	0.000526039	2.53198e-06	0.318087	0.555989	0.117872	0.0080518
	JS-Erz-9s	13	mantle y'	38.99	8.27	4.45	0.0366	25.86	22.41	<0.027	0.3344	100.35	0.999997	0.600817	0.0546917	0.343963	0.000526039	2.6756e-06	0.315909	0.554514	0.122314	0.0072619
	JS-Erz-9s	13	rim y	38.84	8.41	4.17	0.028	26.09	22.25	<0.026	0.4015	100.22	0.999995	0.524791	0.06493	0.410275	2.04874e-07	4.54517e-06	0.320189	0.557089	0.114044	0.00867802
	JS-Erz-9s	13	rim y'	39.47	8.25	4.58	0.0438	25.82	22.35	<0.027	0.398	100.92	0.999993	0.520065	0.0548813	0.42452	0.000526039	7.39436e-06	0.314236	0.55176	0.125392	0.00861128
	JS-Erz-9s	22	core	39.02	8.73	3.17	0.0789	26.64	22.18	<0.026	0.2776	100.11	0.999994	0.51627	0.0477301	0.435994	1.20172e-07	5.5214e-06	0.334276	0.572471	0.0872098	0.00604275
	JS-Erz-9s	22	mantle x	39.34	8.75	3.18	0.1074	26.8	22.19	<0.027	0.2767	100.65	0.999992	0.490825	0.0435268	0.465114	0.000526039	7.89733e-06	0.333512	0.573219	0.0872726	0.00599685
	JS-Erz-9s	22	mantle x'	38.81	8.83	3.1	0.112	26.44	22.31	<0.027	0.2814	99.88	0.999996	0.545989	0.0540778	0.399404	0.000526039	3.51865e-06	0.338932	0.569352	0.0855703	0.00614565
	JS-Erz-9s	22	rim x	39.46	8.54	3.13	0.0942	26.56	22.41	<0.027	0.2621	100.46	0.999994	0.53263	0.0475917	0.419246	0.000526039	6.15534e-06	0.330562	0.576612	0.0870615	0.00576442
	JS-Erz-9s	22	rim x'	38.7	8.89	3.14	0.0911	26.51	21.89	<0.026	0.2452	99.49	0.999995	0.52074	0.0379689	0.44076	0.000526039	5.21735e-06	0.339908	0.568504	0.0862627	0.00532506
	JS-Erz-9s	22	mantle y	39.16	8.9	3.07	0.0883	26.55	22.25	<0.026	0.2449	100.27	0.999995	0.537293	0.0411484	0.421027	0.000526039	4.86465e-06	0.340551	0.569652	0.0844674	0.00532949
	JS-Erz-9s	22	mantle y'	38.85	8.85	3.24	0.0873	26.69	22.25	<0.027	0.2976	100.28	0.999996	0.526718	0.0532527	0.419499	0.000526039	3.96216e-06	0.336229	0.568799	0.0885426	0.00642889
	JS-Erz-9s	22	rim y	39.08	8.75	3.17	0.0908	26.58	22.36	<0.027	0.2826	100.31	0.999996	0.536137	0.052179	0.411154	0.000526039	4.33225e-06	0.335421	0.571289	0.0871288	0.00616113
	JS-Erz-9s	22	rim y'	39	9.03	3.07	0.1124	26.47	22.34	<0.026	0.2682	100.29	0.999996	0.541889	0.0477517	0.40983	0.000526039	3.81385e-06	0.34409	0.566079	0.0840182	0.00581279
	JS-Erz-9s	32	core	38.79	8.83	3.25	0.0776	26.73	22.28	<0.026	0.3186	100.27	0.999996	0.520083	0.0590824	0.420304	0.000526039	3.85495e-06	0.335192	0.569328	0.0886101	0.00686977
	JS-Erz-9s	32	mantle x	39.28	8.75	3.19	0.0976	26.45	22.34	<0.027	0.3102	100.43	0.999993	0.497177	0.0529983	0.449291	0.000526039	7.02865e-06	0.335737	0.569388	0.0881035	0.00677201
	JS-Erz-9s	32	mantle x'	38.91	8.89	3.23	0.0798	26.72	22.07	<0.027	0.2868	100.19	0.999994	0.499854	0.045471	0.454144	0.000526039	5.73116e-06	0.337293	0.56856	0.0879678	0.00617928
	JS-Erz-9s	32	rim x	39.49	8.57	3.33	0.0984	26.49	22.63	<0.027	0.3318	100.95	0.999994	0.521555	0.063198	0.414715	0.000526039	5.50206e-06	0.329391	0.571385	0.0919782	0.00724625
	JS-Erz-9s	32	rim x'	38.44	8.87	3.18	0.0693	26.77	22.08	<0.027	0.3161	99.75	0.999996	0.512284	0.0586049	0.428582	0.000526039	3.67303e-06	0.336496	0.569885	0.0868004	0.00681886
	JS-Erz-9s	32	mantle y	38.88	8.78	3.18	0.0719	26.53	22.29	<0.027	0.3239	100.05	0.999995	0.508429	0.0601182	0.430922	0.000526039	4.85739e-06	0.335946	0.569604	0.0874129	0.00703649
	JS-Erz-9s	32	mantle y'	39.23	8.65	3.21	0.106	26.71	22.19	<0.027	0.3154	100.43	0.999991	0.47297	0.051746	0.47475	0.000526039	8.79906e-06	0.33127	0.573475	0.0883946	0.00686023
	JS-Erz-9s	32	rim y	38.79	8.71	3.25	0.0848	26.46	21.95	0.0417	0.3039	99.6	0.999993	0.483234	0.0480506	0.468707	3.40084e-07	7.447e-06	0.334178	0.569519	0.0896697	0.00663355
	JS-Erz-9s	32	rim y'	39.3	8.74	3.24	0.0977	26.41	22.29	<0.026	0.3053	100.38	0.999992	0.49549	0.0499693	0.454007	0.000526039	7.53918e-06	0.335383	0.568685	0.0892782	0.00665375
	JS-Erz-9s	65	core	39.52	10.93	4.43	0.0734	22.04	22.34	<0.026	0.4443	99.8	0.999987	0.484773	0.0283805	0.486308	0.000526039	1.31738e-05	0.408948	0.462469	0.119138	0.0094449
	JS-Erz-9s	65	mantle x	39.62	10.9	4.06	0.0634	22.51	22.51	<0.026	0.4864	100.15	0.999986	0.458666	0.0361702	0.504624	0.000526039	1.41124e-05	0.407868	0.472548	0.109241	0.0103422
	JS-Erz-9s	65	mantle x'	39.57	10.88	4.42	0.0951	22.05	22.3	<0.026	0.5123	99.85	0.99998	0.440254	0.031608	0.527592	0.000526039	1.99774e-05	0.407084	0.462964	0.119057	0.0108943
	JS-Erz-9s	65	rim x	39.75	10.1	3.8	0.0602	23.93	22.77	<0.026	0.5858	101.01	0.999986	0.424574	0.0628456	0.512565	1.24015e-06	1.42155e-05	0.379798	0.505056	0.102621	0.0125258
	JS-Erz-9s	65	rim x'	39.66	10.76	4.63	0.0983	21.9	22.35	<0.026	0.5164	99.91	0.99998	0.453368	0.0315167	0.51457	0.000526039	1.9525e-05	0.403487	0.460724	0.12479	0.0109982
	JS-Erz-9s	65	mantle y	39.73	11.04	4.43	0.094	22.07	22.41	<0.026	0.4917	100.28	0.999982	0.452949	0.0298989	0.516608	0.000526039	1.76694e-05	0.410752	0.46044	0.118423	0.0103847
	JS-Erz-9s	65	mantle y'	39.55	10.97	4.31	0.0558	22.22	22.43	<0.026	0.4991	100.05	0.999986	0.461037	0.0337519	0.504671	0.000526039	1.44077e-05	0.409143	0.464754	0.115527	0.0105761
	JS-Erz-9s	65	rim y	39.31	10.98	4.63	0.0682	22.13	22.26	<0.027	0.4861	99.87	0.999988	0.475666	0.0302935	0.493502	0.000526039	1.20419e-05	0.406695	0.459806	0.123271	0.0102288
	JS-Erz-9s	65	rim y'	39.82	11.01	4.2	0.067	22.19	22.73	<0.026	0.4611	100.49	0.99999	0.501632	0.0345801	0.463252	0.000526039	1.04557e-05	0.411844	0.465454	0.112898	0.00980343
	JS-Erz-9s	66	core	40.05	12.05	4.07	0.0514	20.54	22.87	<0.026	0.882	100.52	0.999954	0.356295	0.0490954	0.594038	0.000526039	4.56791e-05	0.446258	0.426775	0.108401	0.0185663
	JS-Erz-9s	66	mantle x	39.84	12.04	4.03	0.0883	20.39	22.6	<0.027	0.8998	99.87	0.999935	0.327376	0.0449818	0.627051	0.000526039	6.50599e-05	0.447702	0.425433	0.107854	0.0190115
	JS-Erz-9s	66	mantle x'	39.95	12.12	3.88	0.0603	20.72	22.82	0.0328	0.9234	100.5	0.999949	0.3337	0.0521896	0.614022	3.64675e-05	5.10629e-05	0.447724	0.429629	0.103257	0.0193898
	JS-Erz-9s	66	rim x	40.11	12	4.02	0.0582	20.69	22.71	<0.026	0.8951	100.5	0.99993	0.321298	0.0448213	0.633799	1.24244e-05	6.96021e-05	0.444411	0.429769	0.106985	0.0188346
	JS-Erz-9s	66	rim x'	39.66	11.48	4.31	0.0336	21.08	22.26	<0.026	1.0851	99.9	0.999887	0.265674	0.0483374	0.68535	0.000526039	0.000112889	0.424755	0.437751	0.114661	0.0228335
	JS-Erz-9s	66	mantle y	40.05	12.17	3.98	0.0492	20.49	22.84	<0.026	0.8754	100.46	0.99995	0.348091	0.0473058	0.604028	0.000526039	5.00205e-05	0.450289	0.425337	0.10596	0.0184141
	JS-Erz-9s	66	mantle y'	40.19	12.02	3.87	0.0609	20.85	22.82	<0.027	0.9448	100.76	0.999928	0.310514	0.0501575	0.63873	0.000526039	7.21353e-05	0.444522	0.432697	0.102928	0.0198528
	JS-Erz-9s	66	rim y	39.85	12.17	4.07	0.0638	20.09	22.59	<0.025	0.8784	99.72	0.999934	0.334471	0.0418634	0.623073	0.000526039	6.61508e-05	0.453041	0.419612	0.10877	0.0185773
	JS-Erz-9s	66	rim y'	40.01	11.74	3.76	0.0599	21.26	22.49	<0.026	1.0133	100.33	0.999873	0.257423	0.0487627	0.693161	0.000526039	0.000126821	0.4358	0.442438	0.100403	0.0213585
	JS-Erz-9s	72	core	39.06	9.09	2.95	0.1185	27.05	22.13	<0.027	0.3366	100.73	0.999991	0.43186	0.0536058	0.513999	0.000526039	9.28559e-06	0.342054	0.570971	0.0797741	0.00720114
	JS-Erz-9s	72	mantle x	39	8.96	2.88	0.0961	26.85	22.03	<0.026	0.3246	100.16	0.999989	0.428058	0.0519059	0.520025	1.25172e-07	1.11135e-05	0.34097	0.573381	0.0786341	0.00701556
	JS-Erz-9s	72	mantle x'	38.53	9.04	3.02	0.083	26.64	21.74	0.0338	0.3304	99.42	0.99999	0.425961	0.0483296	0.525699	3.63475e-07	1.00387e-05	0.343178	0.567198	0.0825074	0.00711668
	JS-Erz-9s	72	rim x	39.21	8.07	3.09	0.0326	27.77	22.25	<0.027	0.3812	100.82	0.999989	0.426551	0.0792084	0.493704	0.000526039	1.11405e-05	0.309242	0.597163	0.085285	0.00831025
	JS-Erz-9s	72	rim x'	38.56	9.19	3.07	0.0775	26.71	21.56	<0.027	0.3184	99.49	0.999987	0.401931	0.0393869	0.558144	0.000526039	1.30076e-05	0.346008	0.564179	0.0829963	0.00681581
	JS-Erz-9s	72	mantle y	38.96	8.93	3	0.1005	26.56	21.8	0.0309	0.3453	99.73	0.999982	0.391723	0.0467328	0.561526	2.63612e-07	1.81239e-05	0.340862	0.569211	0.0824317	0.00749531
	JS-Erz-9s	72	mantle y'	38.94	8.84	2.97	0.0845	26.46	22.26	<0.027	0.3314	99.89	0.999993	0.477666	0.0613411	0.46046	0.000526039	6.86116e-06	0.339864	0.57069	0.0821982	0.00724686
	JS-Erz-9s	72	rim y	38.88	8.83	3.04	0.0912	26.74	21.99	<0.027	0.3063	99.87	0.999991	0.460212	0.0494694	0.489784	0.000526039	8.52075e-06	0.337159	0.572854	0.0833333	0.00665336
	JS-Erz-9s	72	rim y'	39.09	8.78	2.85	0.0946	26.91	22.29	<0.027	0.3135	100.32	0.999993	0.470572	0.060101	0.468793	0.000526039	7.35711e-06	0.336313	0.578359	0.0785011	0.00682691
	JS-Erz-9s	83	core	39.02	8.42	4.5	0.0903	25.85	22.42	<0.026	0.3585	100.67	0.999997	0.584096	0.0559762	0.359399	0.000526039	2.91399e-06	0.319372	0.550113	0.122784	0.00773024
	JS-Erz-9s	83	mantle x	38.95	8.37	4.75	0.085	25.66	22.32	<0.026	0.3974	100.54	0.999996	0.564415	0.0581546	0.376901	0.000526039	3.59814e-06	0.316812	0.545122	0.129514	0.00855127
	JS-Erz-9s	83	mantle x'	39.04	8.39	4.53	0.0629	25.54	22.24	<0.027	0.3873	100.19	0.999995	0.541736	0.0545706	0.403163	0.000526039	5.1889e-06	0.320231	0.547083	0.124284	0.00840252
	JS-Erz-9s	83	rim x	39.18	8.22	4.73	0.1168	25.78	22.47	<0.026	0.3886	100.9	0.999996	0.574661	0.0603456	0.364464	0.000526039	3.56526e-06	0.31251	0.549864	0.129222	0.0084028
	JS-Erz-9s	83	rim x'	38.48	7.95	5.58	0.0811	25.29	22.07	<0.026	0.3896	99.86	0.999998	0.612604	0.0548984	0.331969	0.000526039	2.46451e-06	0.301483	0.537891	0.152224	0.00840198
	JS-Erz-9s	83	mantle y	38.82	8.52	4.3	0.0992	25.62	22.17	<0.026	0.3823	99.93	0.999995	0.536828	0.0557144	0.407453	1.82936e-07	4.70486e-06	0.325073	0.548728	0.117906	0.00829337
	JS-Erz-9s	83	mantle y'	39.19	8.21	4.5	0.0835	25.56	22.32	<0.026	0.3808	100.26	0.999994	0.54752	0.0565633	0.395385	0.000526039	5.53463e-06	0.315839	0.551623	0.124212	0.00832575
	JS-Erz-9s	83	rim y	38.7	8.49	4.44	0.0623	25.89	21.94	<0.026	0.3821	99.92	0.999994	0.514255	0.050603	0.435137	1.09498e-07	5.64458e-06	0.321204	0.549836	0.12074	0.00821954
	JS-Erz-9s	83	rim y'	39.35	8.2	4.73	0.1016	25.46	22.62	<0.026	0.3787	100.85	0.999997	0.59415	0.0599691	0.345351	0.000526039	3.38446e-06	0.3142	0.547147	0.13041	0.00824352
	JS-Erz-9s	86	core	39.12	8.35	3.61	0.0547	27.17	22.09	<0.026	0.3463	100.76	0.999992	0.469313	0.0557281	0.474425	0.000526039	8.2016e-06	0.316459	0.577795	0.0982915	0.00745488
	JS-Erz-9s	86	mantle x	38.97	8.35	3.64	0.0279	27.03	22.22	<0.026	0.3159	100.57	0.999996	0.528198	0.0565942	0.415204	8.97716e-08	4.39929e-06	0.317312	0.576418	0.0994512	0.00681856
	JS-Erz-9s	86	mantle x'	38.8	8.5	3.51	0.0246	26.83	22.09	<0.027	0.3173	100.07	0.999995	0.511323	0.0545608	0.433585	0.000526039	5.00801e-06	0.323688	0.573382	0.0960613	0.00686863
	JS-Erz-9s	86	rim x	39.36	8.28	3.65	0.0752	26.93	22.36	<0.027	0.3328	101	0.999994	0.509329	0.0582809	0.431858	0.000526039	6.31269e-06	0.315922	0.576587	0.100269	0.00722204
	JS-Erz-9s	86	rim x'	38.29	8.19	4.02	0.0292	27.05	21.64	0.0317	0.3375	99.6	0.999995	0.497773	0.0517752	0.450446	1.47016e-07	5.26546e-06	0.309768	0.573698	0.109291	0.00724259
	JS-Erz-9s	86	mantle y	38.93	8.4	3.54	0.0399	27.02	22.23	<0.027	0.3324	100.5	0.999995	0.513167	0.0609052	0.425397	0.000526039	4.74108e-06	0.319411	0.576469	0.0969372	0.007183
	JS-Erz-9s	86	mantle y'	38.72	8.32	3.57	0.0473	26.9	22.03	<0.027	0.3473	99.93	0.999994	0.491768	0.0611388	0.446561	0.000526039	5.91772e-06	0.317813	0.57668	0.0979676	0.00753852
	JS-Erz-9s	86	rim y	38.91	7.55	3.94	<0.024	27.72	21.76	<0.026	0.3993	100.29	0.999986	0.425269	0.0666792	0.507511	0.000526039	1.41156e-05	0.288521	0.594462	0.10834	0.00867719
	JS-Erz-9s	86	rim y'	38.75	8.01	4.35	<0.024	26.62	22.05	0.0588	0.378	100.22	0.999995	0.524885	0.0619129	0.413196	5.12832e-07	4.87748e-06	0.304671	0.568112	0.119054	0.0081632
	JS-Erz-9s	88	core	39.31	8.92	4.81	0.0979	24.58	22.38	<0.026	0.4248	100.55	0.999994	0.537456	0.0482865	0.414251	2.61502e-07	6.13922e-06	0.337851	0.521967	0.131034	0.00914736
	JS-Erz-9s	88	mantle x	39.59	8.89	4.57	0.0893	24.9	22.5	<0.027	0.4428	100.99	0.999992	0.508975	0.0525474	0.437944	0.000526039	8.06032e-06	0.336756	0.529212	0.124501	0.00953052
	JS-Erz-9s	88	mantle x'	39.16	9	4.83	0.1199	24.62	22.13	<0.026	0.4105	100.28	0.999992	0.516279	0.0416684	0.442045	1.89404e-07	7.53188e-06	0.339458	0.520866	0.130879	0.00879707
	JS-Erz-9s	88	rim x	39.61	8.86	4.41	0.0735	24.84	22.44	<0.027	0.4031	100.66	0.999991	0.513626	0.0476146	0.438224	0.000526039	8.72763e-06	0.338291	0.53189	0.121083	0.00873554
	JS-Erz-9s	88	rim x'	38.79	8.84	5.02	0.1175	24.49	22.07	<0.027	0.4071	99.74	0.999995	0.551217	0.0445632	0.403689	0.000526039	4.94783e-06	0.334545	0.520073	0.136626	0.00875599
	JS-Erz-9s	88	mantle y	39.28	9	4.74	0.0933	24.96	22.23	0.0304	0.4015	100.73	0.999993	0.52007	0.0427592	0.437163	3.63658e-07	6.78807e-06	0.337819	0.52568	0.127944	0.00855719
	JS-Erz-9s	88	mantle y'	39.19	9.07	4.76	0.0821	24.73	22.28	0.0371	0.4218	100.57	0.999994	0.526295	0.0459677	0.427731	6.80541e-07	6.07578e-06	0.341093	0.521409	0.12849	0.00900752
	JS-Erz-9s	88	rim y	38.87	8.79	4.21	0.084	25.42	21.96	<0.026	0.4185	99.78	0.999991	0.470128	0.0503034	0.479559	2.47678e-07	9.31263e-06	0.334073	0.541937	0.114946	0.00904333
	JS-Erz-9s	88	rim y'	39.49	9.05	4.86	0.1332	24.42	22.36	<0.027	0.4274	100.74	0.999992	0.520224	0.0436653	0.435576	0.000526039	8.01712e-06	0.341742	0.517204	0.131889	0.00916543
	JS-Erz-9s	93	core	38.88	8.82	3.09	0.0507	26.59	22.2	<0.026	0.3266	99.98	0.999994	0.484605	0.0584767	0.456912	1.87424e-07	6.20597e-06	0.337422	0.570713	0.0847726	0.0070922
	JS-Erz-9s	93	mantle x	39.09	8.85	3.08	0.0509	26.59	22.26	<0.027	0.3085	100.23	0.999993	0.489851	0.0535646	0.456052	0.000526039	6.57343e-06	0.338458	0.570176	0.0846564	0.00670894
	JS-Erz-9s	93	mantle x'	38.83	8.99	3.02	0.0936	26.7	22.2	<0.026	0.3122	100.16	0.999995	0.490736	0.0556282	0.45363	1.60524e-07	5.32961e-06	0.341599	0.569166	0.0824951	0.00673904
	JS-Erz-9s	93	rim x	39.19	8.82	3.05	0.0682	26.48	22.42	0.028	0.3115	100.37	0.999994	0.504703	0.0579833	0.437307	2.08143e-07	5.84214e-06	0.338595	0.570389	0.0842275	0.00678874
	JS-Erz-9s	93	rim x'	38.33	8.93	3.1	0.0396	26.75	21.71	<0.026	0.2975	99.17	0.999994	0.469003	0.0464898	0.484501	1.67717e-07	6.34862e-06	0.339058	0.569958	0.0845597	0.00642391
	JS-Erz-9s	93	mantle y	38.85	8.78	3.02	0.0715	27.07	22.32	<0.027	0.3357	100.46	0.999995	0.488819	0.067441	0.44321	0.000526039	4.80793e-06	0.333466	0.576878	0.0824112	0.00724421
	JS-Erz-9s	93	mantle y'	39.09	8.93	3.22	0.0842	26.67	22.19	<0.026	0.3232	100.51	0.999993	0.4752	0.051272	0.472995	0.000526039	7.16041e-06	0.33838	0.567069	0.0875866	0.00696372
	JS-Erz-9s	93	rim y	38.44	8.6	2.93	0.0503	27.25	22.07	<0.027	0.3083	99.64	0.999996	0.496488	0.0656215	0.43736	0.000526039	4.25209e-06	0.328455	0.584233	0.0806238	0.0066883
	JS-Erz-9s	93	rim y'	39.11	8.97	3.29	0.1008	26.53	22.45	<0.027	0.3266	100.77	0.999996	0.518523	0.0576203	0.423326	0.000526039	4.30248e-06	0.339712	0.563742	0.0895119	0.00703427
	JS-Erz-9s	94	core	39.15	9.18	3.88	0.0326	25.12	22.18	<0.027	0.4154	99.96	0.99999	0.463995	0.0496117	0.485857	0.000526039	1.01121e-05	0.348998	0.535908	0.106115	0.00897899
	JS-Erz-9s	94	mantle x	39.51	9.49	3.98	0.0401	24.88	22.55	<0.026	0.3897	100.86	0.999994	0.514409	0.046737	0.438322	0.000526039	6.39785e-06	0.357715	0.526219	0.107715	0.00835003
	JS-Erz-9s	94	mantle x'	39.12	9.17	3.82	<0.023	25.53	22.24	<0.027	0.4163	100.32	0.999992	0.467592	0.0533901	0.478484	0.000526039	8.30897e-06	0.346383	0.540881	0.103799	0.00893731
	JS-Erz-9s	94	rim x	39.6	9.1	4.3	<0.023	24.94	22.47	<0.026	0.4014	100.83	0.999992	0.509708	0.0466197	0.443138	0.000526039	7.95231e-06	0.344423	0.529959	0.116987	0.00863153
	JS-Erz-9s	94	rim x'	38.75	8.57	4	<0.024	25.88	22.04	<0.027	0.4767	99.71	0.999991	0.447287	0.0685499	0.483627	0.000526039	9.28962e-06	0.326795	0.553446	0.109429	0.0103294
	JS-Erz-9s	94	mantle y	39.18	9.42	4.04	0.0443	24.87	22.45	<0.026	0.381	100.38	0.999995	0.534909	0.0477289	0.416831	0.000526039	4.74466e-06	0.355557	0.526683	0.109594	0.00816551
	JS-Erz-9s	94	mantle y'	39.51	9.2	3.89	0.0616	25.21	22.37	0.0329	0.4241	100.71	0.999989	0.460305	0.0505316	0.489152	5.85953e-07	1.12477e-05	0.348868	0.536025	0.105966	0.00914022
	JS-Erz-9s	94	rim y	39.38	9.41	3.99	0.0644	24.5	22.37	<0.026	0.3824	100.12	0.999992	0.506491	0.0432574	0.449717	0.000526039	8.11772e-06	0.358599	0.523719	0.109409	0.00827278
	JS-Erz-9s	94	rim y'	38.93	8.46	3.71	0.0549	26.36	22.25	<0.027	0.5297	100.3	0.999989	0.418851	0.0884016	0.492211	0.000526039	1.05344e-05	0.322559	0.564103	0.101852	0.0114854
	JS-Erz-9s	107	core	38.98	8.82	3.16	0.0942	26.57	22.19	<0.026	0.3382	100.16	0.999993	0.471567	0.0573745	0.470525	0.000526039	7.3316e-06	0.336728	0.569282	0.0866444	0.00734558
	JS-Erz-9s	107	mantle x	39.2	8.77	3.09	0.0574	26.83	22.19	<0.026	0.3575	100.51	0.999989	0.433493	0.0585934	0.507376	0.000526039	1.1064e-05	0.334096	0.573476	0.0846934	0.00773433
	JS-Erz-9s	107	mantle x'	38.58	8.85	3.11	0.0783	26.7	22.04	<0.027	0.3269	99.7	0.999995	0.482375	0.0579241	0.459169	0.000526039	5.49164e-06	0.33704	0.570667	0.0852113	0.00708164
	JS-Erz-9s	107	rim x	39.32	8.63	3.12	0.0617	27.02	22.33	<0.026	0.366	100.85	0.99999	0.442693	0.0648877	0.491884	0.000526039	9.96678e-06	0.329015	0.577745	0.0853125	0.00792786
	JS-Erz-9s	107	rim x'	38.5	8.89	3.21	0.0607	26.7	21.82	<0.026	0.3401	99.54	0.999992	0.449943	0.0524935	0.49703	0.000526039	7.61172e-06	0.33697	0.568133	0.0875694	0.00732757
	JS-Erz-9s	107	mantle y	38.92	8.76	3.26	0.0834	26.86	22.13	<0.027	0.3452	100.36	0.999993	0.466533	0.0577073	0.475226	0.000526039	7.06805e-06	0.332234	0.571462	0.0888609	0.00744376
	JS-Erz-9s	107	mantle y'	38.85	8.78	3.06	0.0417	26.76	22.12	<0.027	0.3705	100	0.999991	0.439856	0.0647618	0.494847	0.000526039	8.80893e-06	0.335091	0.572897	0.0839805	0.0080322
	JS-Erz-9s	107	rim y	38.91	8.62	3.41	0.0967	26.81	22.17	<0.027	0.3427	100.36	0.999994	0.488363	0.0588991	0.452206	0.000526039	5.9402e-06	0.327823	0.571737	0.0930464	0.00739387
	JS-Erz-9s	107	rim y'	39.04	8.36	3.82	0.0458	27.02	22.16	<0.027	0.3252	100.77	0.999995	0.516696	0.0531833	0.429589	0.000526039	5.11077e-06	0.316041	0.573113	0.103856	0.00699
	JS-Erz-9s	110	core	38.93	8.24	4.58	0.1062	26.06	22.13	0.036	0.3418	100.42	0.999996	0.562426	0.0492223	0.388348	1.98466e-07	4.07932e-06	0.312614	0.555002	0.125012	0.00737125
	JS-Erz-9s	110	mantle x	39.29	8.04	4.4	0.0871	26.36	22.2	<0.026	0.3249	100.72	0.999994	0.548107	0.0483912	0.403496	5.50037e-08	5.71117e-06	0.307171	0.565048	0.120722	0.0070589
	JS-Erz-9s	110	mantle x'	38.57	8.25	4.72	0.1004	25.69	21.99	<0.027	0.3601	99.69	0.999996	0.566594	0.0510934	0.381783	0.000526039	3.64797e-06	0.314035	0.548858	0.129318	0.00778886
	JS-Erz-9s	110	rim x	39.4	7.94	4.38	0.0984	26.43	22.42	<0.026	0.3277	101.02	0.999996	0.571237	0.0547365	0.373496	0.000526039	4.41882e-06	0.304083	0.568027	0.120756	0.00713406
	JS-Erz-9s	110	rim x'	38.32	8.46	4.69	0.0976	25.8	21.7	<0.027	0.3489	99.41	0.999996	0.541407	0.0435147	0.414548	0.000526039	4.19848e-06	0.319092	0.546175	0.127245	0.00748789
	JS-Erz-9s	110	mantle y	38.95	8.03	4.32	0.0714	26.24	22.12	<0.027	0.35	100.1	0.999995	0.54119	0.0555092	0.402769	0.000526039	5.22587e-06	0.308318	0.564775	0.119279	0.00762848
	JS-Erz-9s	110	mantle y'	39.06	8.1	4.65	0.103	25.85	22.42	0.0336	0.2778	100.49	0.999998	0.652119	0.044462	0.303417	1.13277e-07	1.93528e-06	0.310432	0.555518	0.128003	0.00604737
	JS-Erz-9s	110	rim y	38.7	8.42	3.85	0.0418	26.7	22.01	<0.027	0.3527	100.09	0.999995	0.504369	0.0565649	0.438535	0.000526039	5.21147e-06	0.319295	0.568259	0.104836	0.0076109
	JS-Erz-9s	110	rim y'	38.99	8.14	4.81	0.1172	25.5	22.02	<0.026	0.323	99.92	0.999995	0.572424	0.0417392	0.385832	5.48204e-08	5.05044e-06	0.312098	0.54847	0.132395	0.00703766
	JS-Erz-9s	112	core	38.8	9.15	2.81	0.0239	26.9	22.27	<0.026	0.294	100.27	0.999996	0.498116	0.0561825	0.445697	1.7645e-07	4.41376e-06	0.346282	0.570961	0.0764369	0.00632011
	JS-Erz-9s	112	mantle x	39.2	9.16	2.89	0.0292	26.68	22.45	<0.027	0.2785	100.68	0.999995	0.516366	0.0508148	0.432288	0.000526039	4.62767e-06	0.347412	0.567947	0.0786311	0.00601002
	JS-Erz-9s	112	mantle x'	39.18	9.27	2.83	0.0513	26.66	22.06	<0.026	0.3061	100.37	0.999988	0.425171	0.0440878	0.530203	0.000526039	1.2054e-05	0.350764	0.5657	0.0769524	0.00658408
	JS-Erz-9s	112	rim x	39.46	8.94	2.89	0.1035	26.67	22.29	<0.027	0.3157	100.68	0.999988	0.442669	0.0511105	0.505683	0.000526039	1.18682e-05	0.341821	0.572059	0.0792702	0.00684989
	JS-Erz-9s	112	rim x'	38.77	9.18	2.88	0.0255	26.72	21.94	<0.026	0.2952	99.8	0.999992	0.452304	0.0456497	0.501512	0.000526039	8.04611e-06	0.347539	0.567802	0.0783118	0.00634737
	JS-Erz-9s	112	mantle y	38.88	9.18	2.91	0.0463	26.95	22.25	<0.027	0.2933	100.52	0.999995	0.495761	0.0525081	0.451201	0.000526039	4.60804e-06	0.345703	0.56919	0.0788389	0.00626752
	JS-Erz-9s	112	mantle y'	39.09	9.16	2.73	0.0331	26.83	22.2	<0.026	0.3001	100.35	0.999992	0.452155	0.0512752	0.496035	0.000526039	8.41682e-06	0.347752	0.571272	0.0745065	0.00646942
	JS-Erz-9s	112	rim y	38.86	9.14	2.99	<0.023	26.73	22.32	<0.027	0.2886	100.34	0.999996	0.521706	0.0530228	0.424741	0.000526039	3.72552e-06	0.345387	0.566984	0.0814233	0.00620604
	JS-Erz-9s	112	rim y'	39.2	9.11	2.78	<0.023	26.48	22.45	<0.027	0.3182	100.33	0.999993	0.477946	0.0597162	0.461805	0.000526039	6.78353e-06	0.348326	0.568338	0.0764166	0.00691949
	JS-Erz-9s	119	core	39.23	9.17	4.16	0.0596	24.87	22.21	<0.026	0.5515	100.27	0.999984	0.413437	0.0604863	0.525535	0.000526039	1.57553e-05	0.347064	0.527996	0.113083	0.0118571
	JS-Erz-9s	119	mantle x	39.16	9.18	4.14	0.0364	24.97	22.3	<0.026	0.5352	100.32	0.999989	0.43783	0.0637519	0.497881	0.000526039	1.12326e-05	0.346826	0.529121	0.112565	0.0114889
	JS-Erz-9s	119	mantle x'	38.99	9.59	4.22	0.0664	24.51	22.29	<0.027	0.4633	100.13	0.999993	0.488822	0.0514081	0.459237	0.000526039	6.74121e-06	0.360059	0.516255	0.113807	0.00987976
	JS-Erz-9s	119	rim x	39.19	8.83	4.07	0.0499	25.09	22.21	<0.026	0.6412	100.11	0.999979	0.378734	0.0775289	0.543715	4.64791e-07	2.13824e-05	0.33712	0.537384	0.111593	0.0139031
	JS-Erz-9s	119	rim x'	38.88	9.54	4.36	0.0434	23.96	22.19	<0.026	0.476	99.46	0.999992	0.489745	0.0498583	0.459863	0.000526039	7.79891e-06	0.361609	0.509367	0.11877	0.0102536
	JS-Erz-9s	119	mantle y	39.12	9.03	4.11	0.0509	25.02	22.21	<0.027	0.6087	100.16	0.999983	0.396206	0.0715317	0.531719	0.000526039	1.67757e-05	0.342597	0.532189	0.112092	0.0131218
	JS-Erz-9s	119	mantle y'	39.29	9.41	4.24	0.0677	24.87	22.31	<0.027	0.492	100.68	0.99999	0.452639	0.052987	0.493838	0.000526039	1.0298e-05	0.352505	0.522886	0.114138	0.0104709
	JS-Erz-9s	119	rim y	39.09	8.94	4.25	0.0374	25.24	22.2	<0.027	0.6719	100.43	0.999982	0.379856	0.0787392	0.540861	0.000526039	1.77391e-05	0.336973	0.533499	0.115136	0.0143921
	JS-Erz-9s	119	rim y'	39.4	9.5	4.16	0.0647	24.44	22.43	<0.026	0.4949	100.49	0.999989	0.461206	0.0539667	0.484291	0.000526039	1.06009e-05	0.358697	0.517618	0.113062	0.0106225
	JS-Erz-9s	120	core	38.91	8.24	4.66	0.1065	25.93	22.14	<0.027	0.3343	100.34	0.999996	0.575914	0.0476801	0.375876	0.000526039	3.67353e-06	0.313159	0.552428	0.12719	0.00722291
	JS-Erz-9s	120	mantle x	38.99	8.1	4.61	0.1083	26.01	22.21	<0.027	0.308	100.35	0.999997	0.598818	0.0465454	0.354108	0.000526039	3.20255e-06	0.309222	0.557467	0.126629	0.00668226
	JS-Erz-9s	120	mantle x'	38.89	8.32	4.54	0.1255	26.33	22	<0.026	0.3335	100.55	0.999995	0.544106	0.0451653	0.410198	0.000526039	4.5795e-06	0.31338	0.556572	0.122914	0.00713427
	JS-Erz-9s	120	rim x	39.45	7.9	4.67	0.1105	25.82	22.37	<0.026	0.344	100.68	0.999994	0.569877	0.0520226	0.377569	0.000526039	5.53022e-06	0.304484	0.558617	0.129355	0.00754429
	JS-Erz-9s	120	rim x'	38.3	8.4	4.55	0.1089	25.75	21.92	0.0341	0.3389	99.39	0.999997	0.580612	0.049435	0.36995	2.54034e-07	2.72205e-06	0.319329	0.549042	0.124311	0.00731727
	JS-Erz-9s	120	mantle y	38.95	8.13	4.48	0.1011	26.42	22.16	<0.027	0.3508	100.61	0.999996	0.55167	0.0541559	0.393644	0.000526039	4.18493e-06	0.308305	0.562184	0.121961	0.00754999
	JS-Erz-9s	120	mantle y'	38.74	8.36	4.58	0.0762	25.8	22.1	<0.027	0.3286	99.99	0.999997	0.582834	0.0469443	0.369693	0.000526039	3.18886e-06	0.317665	0.550035	0.125211	0.00708867
	JS-Erz-9s	120	rim y	38.8	8.09	4.36	0.0932	26.21	22.14	<0.026	0.3259	100.03	0.999997	0.574778	0.0529651	0.371727	0.000526039	3.49508e-06	0.309847	0.563162	0.119903	0.00708747
	JS-Erz-9s	120	rim y'	38.77	8.35	4.43	0.0438	25.98	22.12	<0.026	0.3511	100.05	0.999996	0.558417	0.05222	0.388834	0.000526039	3.77322e-06	0.317439	0.554028	0.120945	0.00758806
	JS-Erz-9s	123	core	38.6	6.22	9.14	0.1822	23.33	21.78	<0.027	0.4887	99.75	0.999994	0.661169	0.0599913	0.278308	0.000526039	5.85519e-06	0.237823	0.500323	0.251238	0.0106159
	JS-Erz-9s	123	mantle x	39.19	6.32	8.99	0.2112	23.26	22.2	<0.026	0.4699	100.65	0.999995	0.682583	0.0588565	0.258029	0.000526039	5.24273e-06	0.242026	0.500008	0.247737	0.0102286
	JS-Erz-9s	123	mantle x'	38.53	6.44	9.2	0.2161	23.29	21.57	<0.027	0.4643	99.7	0.999993	0.647283	0.0484993	0.303685	0.000526039	6.92851e-06	0.244135	0.495324	0.250533	0.0100082
	JS-Erz-9s	123	rim x	39.11	6.21	8.93	0.1942	23.37	22.07	<0.026	0.4641	100.37	0.999994	0.672619	0.0586459	0.268203	0.000526039	6.16063e-06	0.238935	0.504083	0.246833	0.0101489
	JS-Erz-9s	123	rim x'	38.52	6.45	9.15	0.2142	23.14	21.69	<0.027	0.4669	99.62	0.999994	0.664075	0.0513251	0.284068	0.000526039	5.61872e-06	0.245498	0.494126	0.250276	0.0101
	JS-Erz-9s	123	mantle y	38.72	6.49	8.98	0.2205	23.29	21.84	<0.026	0.4751	100.01	0.999994	0.661031	0.0539641	0.284474	0.000526039	5.58973e-06	0.246852	0.497179	0.245694	0.0102745
	JS-Erz-9s	123	mantle y'	38.88	6.41	9.12	0.206	23.2	22.09	<0.026	0.4308	100.36	0.999996	0.709052	0.0520812	0.238337	0.000526039	3.51485e-06	0.244377	0.496246	0.250037	0.00933895
	JS-Erz-9s	123	rim y	38.77	6.31	9.06	0.1967	23.32	21.92	<0.027	0.5186	100.09	0.999994	0.652187	0.0640577	0.283224	0.000526039	6.12509e-06	0.240922	0.499278	0.24856	0.0112408
	JS-Erz-9s	123	rim y'	38.9	6.37	9.23	0.2083	23.09	21.99	0.031	0.4754	100.3	0.999995	0.67872	0.055566	0.265708	4.77159e-08	5.32535e-06	0.242892	0.493936	0.252874	0.010298
	JS-Erz-9s	124	core	39.12	8.33	3.83	0.1351	26.66	22.16	<0.027	0.348	100.57	0.999993	0.498783	0.0551664	0.445517	0.000526039	6.8723e-06	0.317463	0.570131	0.104875	0.0075316
	JS-Erz-9s	124	mantle x	39	8.38	3.97	0.1476	26.47	22.11	<0.027	0.3172	100.39	0.999995	0.532371	0.0484088	0.418689	0.000526039	5.14032e-06	0.319004	0.565416	0.108721	0.00685958
	JS-Erz-9s	124	mantle x'	38.98	8.52	3.95	0.1624	26.31	22	<0.027	0.3584	100.28	0.999992	0.484742	0.0496964	0.465027	0.000526039	7.8696e-06	0.323614	0.560721	0.107927	0.00773752
	JS-Erz-9s	124	rim x	39.3	8.19	3.92	0.1703	26.5	22.35	<0.027	0.3689	100.79	0.999993	0.509554	0.0623602	0.427553	0.000526039	6.67894e-06	0.314022	0.570061	0.107877	0.00804018
	JS-Erz-9s	124	rim x'	38.79	8.58	3.85	0.1616	26.54	22.04	<0.027	0.3458	100.32	0.999995	0.506133	0.0524754	0.440861	0.000526039	5.2969e-06	0.32469	0.563171	0.104707	0.00743187
	JS-Erz-9s	124	mantle y	39.02	8.36	3.97	0.13	26.53	22.16	<0.027	0.3672	100.54	0.999994	0.502803	0.0575326	0.439132	0.000526039	6.18347e-06	0.317706	0.565846	0.108509	0.00793849
	JS-Erz-9s	124	mantle y'	39.19	8.38	3.98	0.1347	26.56	22.08	0.0264	0.3817	100.73	0.99999	0.467035	0.0540235	0.478932	1.38862e-07	9.62555e-06	0.317941	0.565303	0.108533	0.00822319
	JS-Erz-9s	124	rim y	39.03	8.51	3.98	0.1527	26.33	22.19	<0.027	0.3441	100.53	0.999995	0.523215	0.0521757	0.424078	0.000526039	5.22013e-06	0.323037	0.561029	0.108511	0.00742269
	JS-Erz-9s	124	rim y'	39.41	8.35	3.93	0.1365	26.17	22.12	<0.027	0.3776	100.49	0.999987	0.460156	0.0514064	0.487899	0.000526039	1.3006e-05	0.320207	0.563309	0.108251	0.00823246
	JS-Erz-9s	135	core	39.29	9.7	4.8	0.0877	23.49	22.17	<0.027	0.4594	100.01	0.999989	0.485958	0.0372632	0.476241	0.000526039	1.11324e-05	0.364883	0.495505	0.129795	0.00981739
	JS-Erz-9s	135	mantle x	39.49	9.74	4.85	0.1009	23.48	22.33	<0.026	0.4762	100.45	0.999989	0.489462	0.0391711	0.47083	0.000526039	1.08867e-05	0.3652	0.494016	0.130642	0.0101426
	JS-Erz-9s	135	mantle x'	38.94	9.55	4.45	0.0641	24.07	22.05	<0.026	0.5368	99.67	0.999987	0.436078	0.0498631	0.51352	0.000526039	1.29519e-05	0.359655	0.508427	0.120434	0.0114833
	JS-Erz-9s	135	rim x	39.71	9.5	5.03	0.0779	23.26	22.42	<0.027	0.5272	100.54	0.999985	0.476586	0.0434968	0.479377	0.000526039	1.47395e-05	0.358986	0.492998	0.136693	0.011324
	JS-Erz-9s	135	rim x'	38.86	9.12	4.4	0.0281	24.91	22.08	<0.027	0.6415	100.06	0.999986	0.398804	0.0701024	0.530553	0.000526039	1.44035e-05	0.342737	0.524949	0.118627	0.0136865
	JS-Erz-9s	135	mantle y	39.25	9.59	4.74	0.0663	23.69	22.09	<0.026	0.4873	99.94	0.999986	0.458166	0.0396971	0.501597	0.000526039	1.39644e-05	0.361019	0.500331	0.128226	0.0104236
	JS-Erz-9s	135	mantle y'	39.23	9.59	4.79	0.0977	23.84	22.15	<0.026	0.5246	100.23	0.999987	0.452893	0.0442734	0.502294	0.000526039	1.30179e-05	0.358916	0.500932	0.128985	0.0111666
	JS-Erz-9s	135	rim y	38.98	9.57	4.68	0.0864	23.8	22.11	<0.026	0.5428	99.78	0.999988	0.454277	0.0491208	0.496065	0.000526039	1.15149e-05	0.359686	0.50211	0.126599	0.0116049
	JS-Erz-9s	135	rim y'	39.41	9.57	4.85	0.0744	23.65	22.43	0.0268	0.4903	100.5	0.999992	0.506322	0.0456728	0.447996	8.11355e-07	8.46182e-06	0.359721	0.498753	0.131049	0.0104773
	JS-Erz-9s	157	core	39.2	8.17	6.22	0.0369	24.38	22.17	<0.027	0.3902	100.58	0.999995	0.603892	0.0399893	0.355588	0.000526039	4.63554e-06	0.307863	0.515368	0.168422	0.00834658
	JS-Erz-9s	157	mantle x	39.09	8.33	5.64	0.03	24.45	22.11	<0.027	0.3806	100.03	0.999995	0.584043	0.0405256	0.3749	0.000526039	5.18233e-06	0.316574	0.521249	0.153964	0.00821362
	JS-Erz-9s	157	mantle x'	38.97	7.72	7	<0.023	24.11	22.13	<0.026	0.3391	100.32	0.999997	0.681056	0.0357537	0.283187	6.22692e-08	2.55503e-06	0.291667	0.510913	0.190146	0.00727513
	JS-Erz-9s	157	rim x	39.52	8.4	5.48	0.0504	24.64	22.48	<0.027	0.3608	100.93	0.999996	0.611241	0.0416517	0.346577	0.000526039	4.02388e-06	0.318442	0.524533	0.149244	0.0077808
	JS-Erz-9s	157	rim x'	38.55	7.64	6.95	<0.024	24.09	21.88	0.0358	0.3887	99.54	0.999997	0.645238	0.0422834	0.312475	1.59172e-07	3.22145e-06	0.289712	0.512504	0.189414	0.0083691
	JS-Erz-9s	157	mantle y	39.12	8.16	6.32	0.0323	24.46	22.22	0.0338	0.36	100.7	0.999997	0.639005	0.0380104	0.322981	1.74393e-07	3.09349e-06	0.306448	0.515314	0.170561	0.0076777
	JS-Erz-9s	157	mantle y'	38.89	8.35	5.69	0.0266	24.74	21.99	<0.026	0.4015	100.11	0.999995	0.56629	0.0425011	0.390678	0.000526039	5.12385e-06	0.314619	0.522774	0.154018	0.00858948
	JS-Erz-9s	157	rim y	39.14	7.96	6.15	<0.023	24.23	22.06	<0.026	0.377	99.96	0.999994	0.602284	0.0393401	0.35837	7.62503e-08	5.60532e-06	0.303905	0.519025	0.168892	0.00817757
	JS-Erz-9s	157	rim y'	38.64	8.55	5.35	<0.024	24.65	21.91	<0.026	0.354	99.49	0.999996	0.587373	0.0380215	0.374076	0.000526039	3.85984e-06	0.323451	0.523408	0.145528	0.0076135
	JS-Erz-9s	159	core	38.95	9.22	4.3	<0.024	25.15	22.16	<0.026	0.3663	100.18	0.999995	0.529782	0.0423749	0.427312	0.000526039	4.94165e-06	0.346201	0.529756	0.116224	0.00781957
	JS-Erz-9s	159	mantle x	39.37	9.02	4.22	0.0719	24.64	22.23	<0.027	0.3758	99.92	0.99999	0.505481	0.0418061	0.452177	0.000526039	9.50575e-06	0.34575	0.529814	0.11626	0.00817686
	JS-Erz-9s	159	mantle x'	38.82	9.2	4.34	0.0475	25.28	22.06	0.0305	0.3506	100.13	0.999996	0.535645	0.0399867	0.424363	3.68702e-07	4.49675e-06	0.344449	0.531258	0.116837	0.00745596
	JS-Erz-9s	159	rim x	39.25	9.16	4.24	0.0623	25.2	22.44	<0.026	0.3603	100.74	0.999996	0.551973	0.0456628	0.401834	0.000526039	4.23862e-06	0.345	0.532456	0.114834	0.00771097
	JS-Erz-9s	159	rim x'	38.61	8.96	4.34	<0.023	24.92	22.14	<0.026	0.3526	99.35	0.999997	0.57187	0.0463434	0.381258	0.000526039	3.29301e-06	0.341329	0.532353	0.118687	0.00763106
	JS-Erz-9s	159	mantle y	38.91	9.17	4.26	0.0503	25.07	22.16	0.0354	0.3274	99.98	0.999996	0.559819	0.0388642	0.401312	4.34117e-07	4.01549e-06	0.346202	0.531206	0.115566	0.00702654
	JS-Erz-9s	159	mantle y'	39.34	9.12	4.22	0.0309	25.14	22.4	<0.026	0.3514	100.61	0.999995	0.544567	0.0430117	0.41189	0.000526039	5.10297e-06	0.344816	0.532973	0.114661	0.00754962
	JS-Erz-9s	159	rim y	38.56	9.18	4.33	<0.023	24.88	21.88	<0.027	0.3717	99.23	0.999994	0.517318	0.0409816	0.441169	0.000526039	5.54105e-06	0.347016	0.527412	0.117585	0.00798662
	JS-Erz-9s	159	rim y'	39.34	9.08	4.26	<0.023	24.97	22.44	0.0356	0.3543	100.5	0.999995	0.554009	0.0441052	0.401881	4.67083e-07	4.87906e-06	0.344557	0.531554	0.116246	0.0076438
	omphacite-bearing garnets
	JS-Erz-3s	20	core	38.63	6.22	8.71	0.0879	24.11	22.09	<0.026	0.3976	100.26	0.999998	0.723425	0.0578888	0.218158	0.000526039	2.13298e-06	0.237069	0.515749	0.238561	0.00862069
	JS-Erz-3s	42	core	39.08	7.17	8.72	0.0513	22.63	22.16	0.0316	0.393	100.23	0.999997	0.71308	0.0371853	0.249732	8.05181e-08	3.39601e-06	0.271941	0.481715	0.237866	0.00847739
	JS-Erz-3s	52	core	38.84	6.52	10.44	0.1874	21.66	21.97	<0.026	0.4268	100.05	0.999996	0.739276	0.03893	0.221264	0.000526039	4.08572e-06	0.246881	0.460051	0.283897	0.00917128
	JS-Erz-3s	66	core	38.65	5.14	8.94	0.1232	25.5	21.93	<0.027	0.5148	100.81	0.999995	0.641509	0.109403	0.248556	0.000526039	5.06277e-06	0.196537	0.546655	0.24563	0.0111786
	JS-Erz-3s	102	core	39.31	6.05	10.28	0.1464	22.38	22.2	<0.026	0.4452	100.83	0.999995	0.725556	0.0498592	0.224053	0.000526039	5.32723e-06	0.230385	0.478351	0.281619	0.00964404
	JS-Erz-3s	105	core	38.82	5.15	9.09	0.1148	25.31	22.05	<0.026	0.4472	101.01	0.999996	0.685149	0.092504	0.222343	3.92833e-09	3.83949e-06	0.196954	0.543373	0.249942	0.00973106
	JS-Erz-3s	128	core	39.76	7.08	13.62	0.0846	17.29	22.27	0.0349	0.4325	100.56	0.99999	0.802639	0.0182034	0.179147	1.46143e-07	1.04605e-05	0.264035	0.361825	0.364974	0.0091658
	JS-Erz-3s	141	core	40.04	8.49	13.75	0.5687	15.35	22.32	0.0336	0.3202	100.87	0.99999	0.840287	0.00700373	0.1527	3.11276e-07	9.63337e-06	0.312609	0.316914	0.363772	0.00670585
	JS-Erz-5s	32	core	39.31	5.83	10.53	0.0846	22.87	22.23	<0.027	0.4628	101.33	0.999995	0.722394	0.0570326	0.220042	0.000526039	4.91923e-06	0.22022	0.484152	0.285705	0.00992238
	JS-Erz-5s	47	core	40.02	6.91	12.39	0.0562	18.75	22.44	<0.026	0.4268	101.01	0.999991	0.781191	0.0231788	0.195095	0.000526039	9.04451e-06	0.259919	0.395915	0.335044	0.00912231
	JS-Erz-5s	62	core	39.68	5.22	16.12	0.0803	17.16	22.22	<0.026	0.3414	100.84	0.999991	0.874129	0.0203939	0.105468	4.02722e-09	8.6449e-06	0.196147	0.361516	0.43505	0.00728688
	JS-Erz-5s	85	core	39.52	6.2	12.14	0.0889	20.32	22.23	0.0401	0.4144	100.96	0.999994	0.779728	0.0320469	0.188219	5.09978e-08	5.9635e-06	0.233599	0.429097	0.328436	0.00886811
	JS-Erz-5s	96	core	39.07	6.1	8.19	0.0535	25.11	22.08	<0.027	0.5463	101.15	0.999993	0.600342	0.0854607	0.313664	0.000526039	6.90158e-06	0.231092	0.534017	0.223129	0.011762
	JS-Erz-5s	110	core	39.25	3.53	19.6	0.1439	15.45	22.24	0.0481	0.3426	100.62	0.999989	0.916782	0.0326416	0.0505659	2.37183e-09	1.08384e-05	0.133373	0.32728	0.531996	0.0073505
	JS-Erz-5s	135	core	38.97	5.27	7.85	0.057	25.12	21.12	<0.027	0.5567	98.97	0.999933	0.464198	0.0765395	0.459196	5.75543e-09	6.73929e-05	0.208083	0.556636	0.222789	0.0124918
	JS-Erz-5s	195	core	39.25	5.37	13.54	0.1178	19.71	22.11	0.032	0.4305	100.56	0.999993	0.805563	0.0389364	0.155494	1.54364e-08	6.77984e-06	0.203172	0.418823	0.368737	0.00926835
	JS-Erz-5s	200	core	38.89	2.73	14.48	0.1186	22.64	22	<0.026	0.3402	101.19	0.999994	0.806115	0.117803	0.0755502	0.000526039	5.71798e-06	0.10494	0.487768	0.399873	0.00741929
	JS-Erz-5s	201	core	39	5.82	7.75	0.161	26	21.75	0.0365	0.5226	101.04	0.999988	0.551359	0.0847418	0.363887	2.76319e-08	1.20242e-05	0.221515	0.555113	0.212064	0.0113079
	JS-Erz-5s	231	core	39.52	7.27	10.59	0.0678	20.35	22.36	0.0266	0.4263	100.61	0.999995	0.753278	0.0288368	0.21788	8.47175e-08	4.84787e-06	0.274009	0.430181	0.286676	0.00913364
	JS-Erz-5s	249	core	39.37	6.78	9.86	0.0646	21.96	22.22	<0.026	0.4789	100.76	0.999994	0.697751	0.0436126	0.25863	3.95853e-08	6.10896e-06	0.256376	0.465639	0.267697	0.0102883
	JS-Erz-5s	373	core	38.53	5.94	7.36	0.0878	25.73	21.61	<0.027	0.5144	99.79	0.999991	0.557473	0.0865494	0.355442	0.000526039	9.4698e-06	0.228845	0.5561	0.203787	0.011268
	JS-Erz-5s	421	core	38.37	3.08	10.23	0.0834	27.08	21.68	<0.027	0.5805	101.11	0.999989	0.55833	0.276702	0.164431	0.000526039	1.08012e-05	0.118774	0.585254	0.283267	0.0127056
	JS-Erz-5s	493	core	39.78	6.19	15.31	0.0859	16.67	22.48	0.0314	0.4737	101.02	0.99999	0.839639	0.0242335	0.136118	6.99604e-08	9.84122e-06	0.230869	0.348714	0.410378	0.0100392
	JS-Erz-5s	554	core	39.1	6.16	10.72	0.0909	21.77	22.06	0.0261	0.5166	100.44	0.999993	0.704514	0.0526933	0.242786	3.41244e-08	6.99165e-06	0.233477	0.463135	0.292262	0.0111259
	JS-Erz-5s	577	core	39	5.68	7.86	0.0854	25.79	21.99	<0.027	0.5488	100.97	0.999991	0.578024	0.102622	0.318819	0.000526039	8.49602e-06	0.217547	0.554303	0.216212	0.0119376
	JS-Erz-6s	13	core	38.79	5.38	9.4	0.0961	24.77	21.92	0.0392	0.5174	100.9	0.999994	0.650819	0.0905339	0.258641	2.32265e-08	5.87627e-06	0.204416	0.527743	0.256677	0.0111635
	JS-Erz-6s	34	core	38.67	4.3	11.95	0.1113	23.05	21.59	0.0425	0.5058	100.23	0.999988	0.699908	0.0919068	0.208173	5.51594e-09	1.1829e-05	0.16486	0.495241	0.328892	0.0110072
	JS-Erz-6s	40	core	38.77	5.2	8.52	0.1116	25.89	21.62	<0.026	0.5234	100.64	0.999988	0.578113	0.0980719	0.323277	0.000526039	1.17906e-05	0.198751	0.555675	0.234195	0.0113785
	JS-Erz-6s	50	core	39.29	5.86	11.06	0.072	21.5	22.12	<0.027	0.4249	100.33	0.999994	0.751383	0.0435689	0.204516	0.000526039	6.09667e-06	0.224325	0.461905	0.304525	0.00924481
	JS-Erz-6s	73	core	39.4	7.31	10.44	0.1127	20.72	22.16	0.0618	0.446	100.65	0.999994	0.720086	0.0295383	0.250369	4.16733e-07	6.28426e-06	0.273732	0.435589	0.28118	0.00949954
	JS-Erz-6s	74	core	40.3	11.88	5.35	0.0278	19.68	22.64	<0.026	0.3533	100.25	0.999988	0.583245	0.0136448	0.403097	1.36337e-06	1.24515e-05	0.440583	0.409399	0.142581	0.00743755
	JS-Erz-6s	76	core	38.71	5.16	7.67	0.1149	26.79	21.76	<0.027	0.5304	100.74	0.999991	0.56117	0.122292	0.316002	0.000526039	9.23304e-06	0.198382	0.578005	0.212029	0.0115834
	JS-Erz-6s	109	core	38.88	5.8	7.85	0.1224	25.7	21.78	<0.026	0.5658	100.72	0.999989	0.550331	0.0945559	0.355101	1.2733e-08	1.14907e-05	0.221448	0.550631	0.215637	0.0122842
	JS-Erz-6s	118	core	38.85	5.67	7.83	0.0984	25.87	21.82	<0.026	0.5486	100.7	0.99999	0.563922	0.0993096	0.336233	0.000526039	9.79723e-06	0.216965	0.555629	0.215469	0.0119372
	JS-Erz-6s	156	core	35.78	4.22	11.71	0.0629	25.09	20.31	<0.027	0.7047	97.9	0.999996	0.598396	0.165574	0.236026	4.90706e-09	4.14174e-06	0.155635	0.519088	0.310507	0.0147701
	JS-Erz-6s	223	core	39.13	5.68	11.06	0.0604	21.89	22.04	0.0362	0.452	100.35	0.999994	0.737397	0.0511345	0.211462	2.5945e-08	6.31994e-06	0.216977	0.469366	0.303835	0.00982161
	JS-Erz-6s	233	core	39.17	6.72	9.23	0.096	22.67	22.15	0.0617	0.4651	100.56	0.999995	0.687365	0.0479623	0.264667	2.36845e-07	5.22034e-06	0.255116	0.48307	0.251783	0.0100313
	JS-Erz-6s	238	core	38.91	6.59	7.29	0.0558	25.14	22.15	<0.027	0.5522	100.69	0.999994	0.586009	0.0870847	0.326374	0.000526039	5.55571e-06	0.251127	0.537178	0.199737	0.0119576
	JS-Erz-6s	241	core	39.53	6.76	13.33	0.0743	17.72	22.37	0.0709	0.4023	100.26	0.999994	0.830113	0.0207511	0.14913	3.84375e-07	5.6848e-06	0.255019	0.374852	0.3615	0.0086286
	JS-Erz-6s	253	core	39.64	6.83	11.84	0.0805	19.63	22.25	<0.027	0.4291	100.7	0.999993	0.764236	0.0265469	0.208684	0.000526039	7.40216e-06	0.256777	0.414039	0.320015	0.00916943
	JS-Erz-6s	260	core	39.02	6.5	7.17	0.0969	25.47	21.68	<0.027	0.5281	100.47	0.999984	0.514461	0.0677272	0.417271	0.000526039	1.55252e-05	0.247845	0.54443	0.196286	0.011439
	JS-Erz-8s	53	core	38.67	4.99	11.17	0.0906	23.31	22.1	0.0376	0.5362	100.9	0.999996	0.71872	0.0957207	0.185555	1.80673e-08	3.82987e-06	0.189206	0.495303	0.303951	0.0115406
	JS-Erz-8s	70	core	38.8	5.2	9.42	0.0738	24.56	21.86	<0.027	0.5542	100.47	0.999992	0.629901	0.100252	0.269312	0.000526039	8.46103e-06	0.199547	0.528576	0.259794	0.0120827
	JS-Erz-8s	89	core	38.74	4.57	10.29	0.1408	24.77	21.73	0.0397	0.5931	100.87	0.999988	0.619664	0.124426	0.255899	9.35859e-09	1.15807e-05	0.174404	0.5305	0.282227	0.0128691
	JS-Erz-8s	138	mantle	38.65	5.84	9.14	0.1151	23.72	21.52	<0.026	0.58	99.57	0.999985	0.581265	0.0732351	0.344959	0.000526039	1.5279e-05	0.22414	0.510901	0.252303	0.0126566
	JS-Erz-8s	204	core	39.03	5.87	8.79	0.1497	24.74	21.84	0.1267	0.5451	101.08	0.99999	0.594382	0.0776627	0.327945	3.61577e-07	1.04109e-05	0.222447	0.526281	0.23952	0.0117522
	JS-Erz-8s	224	core	39.29	6.3	11.93	0.0999	20.44	22.32	<0.026	0.3908	100.8	0.999997	0.804125	0.0318398	0.163506	0.000526039	3.23847e-06	0.237285	0.431563	0.3228	0.00835229
	JS-Erz-8s	232	core	38.77	5.44	7.82	0.1294	26.15	21.91	<0.027	0.568	100.78	0.999992	0.568875	0.119788	0.310803	0.000526039	8.06072e-06	0.208656	0.563139	0.215823	0.0123827
	JS-Erz-13s	120	core	39.23	6.73	9.68	0.1445	22.19	22.12	<0.027	0.4754	100.58	0.999994	0.689347	0.0446629	0.265458	0.000526039	6.16954e-06	0.254721	0.471675	0.263372	0.0102321
	JS-Erz-13s	154	core	39.35	5.59	11.64	0.1388	21.68	21.94	0.042	0.415	100.79	0.999991	0.743198	0.0413931	0.215401	2.16236e-08	8.507e-06	0.212167	0.461472	0.317418	0.00894299
	JS-Erz-14s	97	core	39.29	5.91	13.65	0.049	18.52	22.28	<0.027	0.3553	100.07	0.999996	0.852058	0.0241528	0.123259	0.000526039	3.93701e-06	0.224695	0.394761	0.372876	0.00766802
	JS-Erz-14s	220	core	39.28	6.94	9.9	0.1158	21.5	21.97	0.0485	0.4571	100.21	0.999991	0.683738	0.0351551	0.281098	1.7377e-07	8.65871e-06	0.263132	0.457237	0.269785	0.00984665
